# Supplementary material
Source: Royal Society of Chemistry journal article supplement (doi:10.1039/d5em01016k)
Supplement: d5em01016k1.xlsx [file d5em01016k1.xlsx]

## Sheet: Nontarget - Level 2
tags	checked	predicted_name	formula	annotated_source_predicted_compositions	annotated_source_mzcloud	annotated_source_mzvault	annotated_source_chemspider	annotated_source_masslist	annotated_delta_mass_ppm	calc_mw	rt_min	area_max	num_chemspider_results	num_mzcloud_results	num_mzvault_results	mzcloud_best_match	mzcloud_best_match_confidence	mzVault Best Match	mzVault Library Match: GNPS	mzVault Library Match: MassBank	mzVault Library Match: MassBankEU	match_cr_list	MS2	ref_ion	Area: BAS-A.raw (F7)	Area: BAS-B.raw (F8)	Area: BAS-C.raw (F9)	Area: CMT-A-F.raw (F10)	Area: CMT-B-F.raw (F11)	Area: CMT-C-F.raw (F12)	Area: GRI-A.raw (F13)	Area: GRI-B.raw (F14)	Area: GRI-C.raw (F15)	Area: JER-A.raw (F16)	Area: JER-B.raw (F17)	Area: JER-C.raw (F18)	Area: KIR-A-F.raw (F19)	Area: KIR-B-F.raw (F20)	Area: KIR-C-F.raw (F21)	Area: KIT-A-F.raw (F22)	Area: KIT-B-F.raw (F23)	Area: KIT-C-F.raw (F24)	Area: THU-A.raw (F32)	Area: THU-B.raw (F33)	Area: THU-C.raw (F34)	Area: UNA-A-F.raw (F35)	Area: UNA-B-F.raw (F36)	Area: UNA-C-F.raw (F37)	Area: WIN-A.raw (F41)
	TRUE	3-Phenyl-2,3-dihydro-1,3-benzothiazol-2-imine	C13 H10 N2 S	Not the top hit	Full match	No results	Partial match	No results	-0.23	226.05642	13.709	3423987.657	61	1	0	52.7	7.6		No matches found	No matches found	No matches found	No matches found	DDA for preferred ion	[M+H]+1	1.1899e+06	1.9996e+06	1.92016e+06	2.60324e+06	1.3638e+06	1.5266e+06	532020	255551	687659	1.19947e+06	1.13649e+06	474372	2.07182e+06	1.3328e+06	2.07673e+06	3.03999e+06	3.42399e+06	2.70801e+06	1.10559e+06	226046	218341	488624	167801	1.19935e+06	705835
	TRUE	4-Methoxychalcone	C16 H14 O2	Full match	Full match	No results	Partial match	No results	0.01	238.09938	12.3	7266361.17	327	1	0	58.4	64.5		No matches found	No matches found	No matches found	No matches found	DDA for preferred ion	[M+H]+1	171611	272264	237371	286551	259006	264664	274719	503196	296636	273889	233576	282385	263710	267005	502917	262427	264669	260362	287456	288382	241469	287753	440720	261735	267338
	TRUE	7-methyl-3-nitroimidazo[1,2-a]pyridine	C8 H7 N3 O2	Full match	Full match	No results	Partial match	No results	-0.35	177.05376	6.598	1146172.776	321	1	0	54.1	7.7		No matches found	No matches found	No matches found	No matches found	DDA for preferred ion	[M+H]+1	101864	102767	101510	102314	105971	94305.7	98337.8	100250	98534.5	106816	102157	101434	103030	99110.5	107136	106212	108587	109186	109636	105518	102073	103563	100787	99798.4	98248
	TRUE	acridine-9(10H)-thione	C13 H9 N S	No match	Full match	Invalid mass	No match	Full match	-0.15	211.04554	15.942	4209097.16	5	1	1	51.1	7.6	54	Single match found	No matches found	No matches found	Single match found	DDA for preferred ion	[M+H]+1	2.93026e+06	1.73244e+06	2.64706e+06	594601	647197	291514	696659	840226	714849	650739	1.51899e+06	1.56215e+06	2.83338e+06	3.67874e+06	4.2091e+06	2.20132e+06	1.63475e+06	2.40971e+06	1.06289e+06	1.18991e+06	1.09641e+06	3.09711e+06	2.10551e+06	2.64407e+06	876057
	TRUE	Alpha-pyrrolidinovalerophenone	C15 H21 N O	Full match	No results	Full match	Partial match	No results	-1.56	231.16195	7.559	2686558.932	323	0	2			66.8	Multiple matches found	No matches found	No matches found	No matches found	DDA for preferred ion	[M+H]+1	582769	23258.2	1.76255e+06	28829.8	23792.2	420637	49552.2	2.06943e+06	23085.8	1.37363e+06	41583.3	102298	24013.2	24921.8	1.90798e+06	267880	24294	27900.5	21141.6	1.21841e+06	22553.1	346872	543166	24344	23795.3
	TRUE	Betaine	C5 H11 N O2	Full match	Full match	Full match	Partial match	No results	-0.93	117.07887	2.401	111155751.2	221	1	18	57.5	7.9	72.4	Multiple matches found	Multiple matches found	No matches found	No matches found	DDA for preferred ion	[M+H]+1	5.13346e+06	8.27805e+06	3.8153e+06	3.21294e+06	3.52956e+06	3.63188e+06	3.9379e+06	1.07157e+07	4.37755e+06	1.84137e+06	1.07569e+07	1.17406e+07	3.3449e+07	3.31615e+06	9.50825e+06	3.99349e+06	3.53302e+06	3.83661e+06	3.58513e+06	6.65994e+06	1.11156e+08	5.71053e+06	3.84236e+06	3.93594e+06	1.38162e+07
	TRUE	Betaine	C5 H11 N O2	Full match	Full match	Full match	Partial match	No results	-1.06	117.07885	0.9	49112854.86	221	1	18	53.5	7.7	67.6	Multiple matches found	Multiple matches found	No matches found	No matches found	DDA for preferred ion	[M+H]+1	1.05624e+07	1.79468e+07	3.41721e+06	16949458	4.22329e+06	1.92577e+07	3.13483e+06	2.35699e+07	1.3277e+07	6.90227e+06	3.7183e+06	4.89829e+06	3.29388e+06	3.13261e+06	5.30507e+06	4.5966e+06	1.5299e+07	5.39924e+06	4.91129e+07	3.67678e+06	2.04168e+07	1.29371e+07	3.43753e+06	2.8089e+06	3.18136e+06
	TRUE	Chalcone	C15 H12 O	Full match	Full match	Full match	Full match	No results	-0.2	208.08877	15.017	1130478.137	105	1	9	52.8	44.9	65.9	No matches found	Multiple matches found	No matches found	No matches found	DDA for preferred ion	[M+H]+1	77172.7	57957	74332.5	75755.4	79771.9	79761.7	79396.4	76697.5	58692.9	76512.7	56053.3	63727.2	75942.5	61629.4	76235.8	76371.6	63640.7	74753.9	77118.2	63675.9	67116.9	83097.7	83762.8	80797.1	76038.2
	TRUE	DEET	C12 H17 N O	Full match	Full match	Full match	Full match	No results	-0.55	191.13091	10.977	167222615.9	610	1	17	93	80	91.1	Multiple matches found	Multiple matches found	Multiple matches found	No matches found	DDA for preferred ion	[M+H]+1	1.0127e+08	1.13808e+08	1.67223e+08	48318.5	116208	73658.6	289516	277609	66799.6	116967	87794.5	215277	305753	104055	183324	783731	355475	282362	743194	280000	89135.2	34617.9	51570	69698.8	269563
	TRUE	Dipropylene glycol dimethyl ether	C8 H18 O3	Full match	Full match	No results	Partial match	Full match	-0.75	162.12547	15.184	36852349.46	82	1	0	54	63.2		No matches found	No matches found	No matches found	Multiple matches found	DDA for preferred ion	[M+Na]+1	2.85576e+06	1.80702e+06	2.86752e+06	3.01599e+06	2.05334e+06	2.81439e+06	3.68523e+07	1.8786e+06	1.11438e+06	2.42933e+06	1.8877e+06	1.86288e+06	2.25962e+06	1.47137e+06	1.94962e+06	2.96199e+06	1.72154e+06	2.33534e+06	2.59859e+06	1.17756e+07	8.72882e+06	2.75104e+06	1.63873e+07	2.51769e+06	2.52509e+06
	TRUE	Leucomalachite green	C23 H26 N2	Full match	Not the top hit	Full match	Full match	No results	-0.38	330.20947	8.686	45070508.45	25	2	3	62.3	8.1	82.1	No matches found	Multiple matches found	No matches found	No matches found	DDA for preferred ion	[M+H]+1	6.79718e+06	5.60791e+06	3.40849e+06	7.77189e+06	7.83907e+06	6.83491e+06	2.0973e+06	2.00616e+06	3.37493e+06	268343	168141	146850	2.50398e+06	4.06135e+06	3.06834e+06	2.02506e+06	3.73093e+06	1.46627e+06	582748	459758	493505	4.50705e+07	3.725e+07	2.68655e+07	151429
	TRUE	Leucomalachite green	C23 H26 N2	Full match	Not the top hit	Full match	Full match	No results	0.51	330.20977	14.119	9268258.91	25	2	3	63.7	8.2	78.7	No matches found	Multiple matches found	No matches found	No matches found	DDA for preferred ion	[M+H]+1	556069	202657	162907	3.94896e+06	2.77591e+06	3.22323e+06	169511	164517	310097	162113	144610	160541	166832	118624	169425	167646	164796	173331	170002	132893	108398	9.26826e+06	4.99506e+06	5.7756e+06	164625
	TRUE	Massbank: Desipramine|3-(10,11-Dihydro-5H-dibenzo[b,f]azepin-5-yl)-N-methylpropan-1-amine	C18 H22 N2	Full match	No results	Full match	Partial match	No results	-0.4	266.17819	9.469	84302578.1	110	0	11			69.3	No matches found	Multiple matches found	No matches found	No matches found	DDA for preferred ion	[M+H]+1	88767.6	161064	162560	8.43026e+07	6.51681e+07	7.37713e+07	149751	155858	239382	149756	142810	148314	493615	261497	146211	149011	341730	155834	151018	168458	166507	1.41063e+06	151530	273938	220000
	TRUE	Massbank: Desipramine|3-(10,11-Dihydro-5H-dibenzo[b,f]azepin-5-yl)-N-methylpropan-1-amine	C18 H22 N2	Full match	No results	Full match	Partial match	No results	-0.47	266.17817	9.264	76124051.98	110	0	8			58.3	No matches found	Multiple matches found	No matches found	No matches found	DDA for preferred ion	[M+H]+1	175193	192746	41384.8	5.90167e+07	7.61241e+07	5.93587e+07	176698	173409	391426	197078	176969	191767	149195	177662	182459	194851	182760	196074	200922	682902	187941	551832	265708	364884	185075
	TRUE	Massbank: Dextromethorphan	C18 H25 N O	Full match	No results	Full match	Partial match	No results	-0.13	271.19358	12.644	439344.9994	94	0	9			70.7	Single match found	Multiple matches found	No matches found	No matches found	DDA for preferred ion	[M+H]+1	51507.1	55181.8	65812	280784	439345	355880	41412.5	64795.4	57286.8	59007.7	49306.1	45636.2	75041	61518.1	56864.5	57174.4	61776.2	59461.3	56838.6	57874.9	42375.3	55899.5	66216.7	56884	59194.2
	TRUE	Massbank: Dextromethorphan	C18 H25 N O	Full match	No results	Full match	Partial match	No results	0.19	271.19367	12.697	1329196.471	94	0	9			70.8	Single match found	Multiple matches found	No matches found	No matches found	DDA for preferred ion	[M+H]+1	81758.8	87851.4	105928	1.3292e+06	893053	607289	543399	103437	99708.2	98247.5	86674.9	75713	104761	96206.6	96337.7	97866.9	105338	96884.5	95683.8	98605.6	76194	90735.8	102665	94299	96856.2
	TRUE	Massbank: Lauramidopropyl betaine|3-(Dodecanoylamino)propyl(carboxymethyl)dimethylammonium|carboxymethyl-[3-(dodecanoylamino)propyl]-dimethylazanium	C19 H38 N2 O3	Full match	No results	Full match	Partial match	No results	-0.58	342.28804	15.339	8397418	12	0	13			75.5	Single match found	Multiple matches found	No matches found	No matches found	DDA for preferred ion	[M+H]+1	139922	78667.5	100222	133271	133923	8397418	155947	154812	81636.7	413409	100679	49114.7	147399	114111	148986	579703	175116	67912.5	118365	130676	521669	98476.5	404739	124731	84139
	TRUE	Massbank:AU211801 Nordeprenyl|Desmethylselegiline|1-phenyl-N-prop-2-ynylpropan-2-amine	C12 H15 N	Full match	No results	Full match	Partial match	Full match	-0.54	173.12036	14.124	183605173.9	224	0	1			74.7	No matches found	Single match found	No matches found	Multiple matches found	DDA for preferred ion	[M+H]+1	1.26918e+07	8.36864e+06	5.39101e+06	8.70704e+07	5.58086e+07	7.8478e+07	5.34651e+06	3.27136e+06	2.00392e+07	3.54003e+06	2.90851e+06	3.75041e+06	3.84841e+06	3.92857e+06	7.92074e+06	2.14556e+06	3.90113e+06	2.24777e+06	4.74535e+06	948603	4.14075e+06	1.83605e+08	1.01318e+08	1.22777e+08	3.5317e+06
	TRUE	Massbank:AU211801 Nordeprenyl|Desmethylselegiline|1-phenyl-N-prop-2-ynylpropan-2-amine	C12 H15 N	Full match	No results	Full match	Partial match	Full match	-0.77	173.12032	18.908	36080958.56	224	0	2			75.8	No matches found	Multiple matches found	No matches found	Multiple matches found	DDA for preferred ion	[M+H]+1	9.81046e+06	8.75476e+06	9.81916e+06	7.12038e+06	7.60581e+06	7.87446e+06	5.46989e+06	4.48954e+06	9.07441e+06	3.28688e+06	4302602	2.13265e+06	1.4376e+07	1.81199e+07	1.89719e+07	5.35074e+06	5.52541e+06	3.63385e+06	3.51419e+06	6.85242e+06	6.9825e+06	3.21159e+07	3.18663e+07	3.6081e+07	3.6719e+06
	TRUE	Massbank:AU211801 Nordeprenyl|Desmethylselegiline|1-phenyl-N-prop-2-ynylpropan-2-amine	C12 H15 N	Full match	No results	Full match	Partial match	Full match	-0.81	173.12031	7.536	17914939.83	224	0	1			72.7	No matches found	Single match found	No matches found	Multiple matches found	DDA for preferred ion	[M+H]+1	1.81605e+06	2.68835e+06	4.90995e+06	1.33362e+06	960061	1.46488e+06	1.61637e+06	2.5009e+06	1.03652e+06	6.63829e+06	6.294e+06	1.31119e+06	1.08904e+06	1.02345e+06	1.79149e+07	1.8484e+06	930832	1.90098e+06	937452	5.9504e+06	930849	2.14795e+06	108684	898377	1.29945e+06
	TRUE	Massbank:AU211801 Nordeprenyl|Desmethylselegiline|1-phenyl-N-prop-2-ynylpropan-2-amine	C12 H15 N	Full match	No results	Full match	Partial match	Full match	-0.98	173.12028	7.756	8742326.35	224	0	1			75.9	No matches found	Single match found	No matches found	Multiple matches found	DDA for preferred ion	[M+H]+1	1.079e+06	1.73441e+06	2.11888e+06	666857	1.43295e+06	768620	671323	1.43241e+06	2.70088e+06	1.08631e+06	3.0674e+06	623919	823945	501875	2.22497e+06	791713	521355	4.33544e+06	467390	1.59603e+06	1.74535e+06	672670	872483	542779	4.46002e+06
	TRUE	Massbank:AU211801 Nordeprenyl|Desmethylselegiline|1-phenyl-N-prop-2-ynylpropan-2-amine	C12 H15 N	Full match	No results	Full match	Partial match	Full match	-0.38	173.12038	14.972	21344501.03	224	0	1			70.2	No matches found	Single match found	No matches found	Multiple matches found	DDA for preferred ion	[M+H]+1	2.77431e+06	4.4215e+06	2.20875e+06	7.78465e+06	7.65637e+06	9.87652e+06	2.28828e+06	1.89384e+06	2.38721e+06	2.01524e+06	1.19758e+06	1.36142e+06	1.47326e+06	2.74569e+06	2.07484e+06	1.89735e+06	1.69189e+06	1.6545e+06	1.64731e+06	1.79925e+06	1.9695e+06	2.13445e+07	9.09381e+06	1.48319e+07	1.95106e+06
	TRUE	Massbank:AU230102 Diphenylphosphate|Diphenyl phosphate|diphenyl hydrogen phosphate	C12 H11 O4 P	Full match	No results	Full match	Partial match	No results	-0.43	250.03939	17.794	34534338.76	14	0	5			75.9	No matches found	Multiple matches found	Multiple matches found	No matches found	DDA for preferred ion	[M+H]+1	1.56859e+06	3.00103e+06	2.31777e+06	1.18947e+06	376985	117463	1.07865e+06	747100	923301	355344	489948	511162	357191	428686	305320	584936	507610	646186	894057	1.71611e+06	372676	551855	2.51826e+06	2.57695e+06	2.09871e+06
	TRUE	Massbank:AU252101 4-Hydroxy-1-(2-hydroxyethyl)-2,2,6,6-tetramethylpiperidine|1-Piperidineethanol, 4-hydroxy-2,2,6,6-tetramethyl-|1-(2-hydroxyethyl)-2,2,6,6-tetramethylpiperidin-4-ol	C11 H23 N O2	Full match	No results	Full match	Partial match	No results	-0.19	201.17284	1.87	4181409.204	121	0	4			80	No matches found	Multiple matches found	No matches found	No matches found	DDA for preferred ion	[M+H]+1	295801	293342	300928	160710	76742.3	100752	224347	187970	256499	230095	279513	237168	196274	201803	208823	252261	209323	300493	284555	132132	139869	118266	176545	176956	279927
	TRUE	Massbank:AU287901 N-Cyclohexyl-2-benzothiazol-amine|N-cyclohexyl-1,3-benzothiazol-2-amine	C13 H16 N2 S	Full match	No results	Full match	Partial match	No results	-1.76	232.10301	11.409	4397375.306	81	0	5			85.3	No matches found	Multiple matches found	Single match found	No matches found	DDA for preferred ion	[M+H]+1	3.29364e+06	3.81366e+06	3.16587e+06	1.28113e+06	1.76974e+06	488495	142788	59305	288251	1.18977e+06	577624	836493	3.8366e+06	3.05041e+06	3.89837e+06	4.37444e+06	4.39738e+06	2.51895e+06	1.21289e+06	1.14412e+06	226558	828212	466821	1.28111e+06	754397
	TRUE	Massbank:BML00471 Hydrocinchonine	C19 H24 N2 O	Full match	No results	Full match	Partial match	No results	-0.34	296.18876	7.617	3750220.058	179	0	4			75.3	Multiple matches found	Multiple matches found	No matches found	No matches found	DDA for preferred ion	[M+H]+1	127967	97906.6	117773	2.69716e+06	3.75022e+06	3.30875e+06	89405.7	98527	32892.6	104812	91754.4	96742	84812.8	84270.1	538211	169863	88856.6	96896.2	80876.9	90881.7	81379.2	241887	137181	334302	84517.6
	TRUE	Massbank:EA066002 Galaxolidone|1,3,4,6,7,8-Hexahydro-4,6,6,7,8,8-hexamethylcyclopenta[g]-2-benzopyran-1-on	C18 H24 O2	Full match	No results	Full match	Partial match	No results	-0.68	272.17744	19.099	4775284.655	172	0	8			61.1	No matches found	Multiple matches found	No matches found	No matches found	DDA for preferred ion	[M+H]+1	246068	175240	69732.6	266604	79003.6	347528	214179	94889.5	200740	190598	196196	193498	255661	2.11063e+06	268021	242669	197388	82301.5	1.13591e+06	201826	591548	4.77528e+06	2.87933e+06	2.81194e+06	181777
	TRUE	Massbank:EA066002 Galaxolidone|1,3,4,6,7,8-Hexahydro-4,6,6,7,8,8-hexamethylcyclopenta[g]-2-benzopyran-1-on	C18 H24 O2	Not the top hit	No results	Full match	Partial match	No results	-0.78	272.17742	19.599	4266436.201	173	0	5			59.2	No matches found	Multiple matches found	No matches found	No matches found	DDA for preferred ion	[M+H]+1	274125	265132	280163	262412	302174	263926	265419	259956	274066	266081	269843	267043	259145	489171	76314.3	271623	292833	262908	268863	255975	76451.8	4.26644e+06	2.21106e+06	1.91526e+06	107591
	TRUE	Massbank:EA282402 Dextromethorphan|DXM|(14alpha)-3-Methoxy-17-methylmorphinan	C18 H25 N O	Full match	No results	Full match	Partial match	No results	0.05	271.19363	13.717	872786.6603	94	0	11			73.4	Multiple matches found	Multiple matches found	No matches found	No matches found	DDA for preferred ion	[M+H]+1	70684.8	83411.6	91730.8	267025	191838	135486	93706.4	90919.1	93515.1	93721.6	84186.4	72786.7	322805	80734.2	92649.9	91745.4	91353.1	90227.4	96837.4	67512.6	55298.8	872787	634242	237542	94143.1
	TRUE	Massbank:FIO00342 Praziquantel	C19 H24 N2 O2	Full match	No results	Full match	Partial match	No results	-0.35	312.18367	7.58	3553444.131	138	0	5			74.3	No matches found	Multiple matches found	No matches found	No matches found	DDA for preferred ion	[M+H]+1	113295	113966	737958	3.18445e+06	3.55344e+06	3.48265e+06	126078	536868	116615	831187	128531	130744	116147	120542	722001	143763	119199	134949	108495	304315	111794	258212	190688	117747	115093
	TRUE	Massbank:FIO00377 N,N-Diethyl-3-methoxybenzamide	C12 H17 N O2	Full match	No results	Full match	Partial match	No results	-0.22	207.12588	8.548	8585464.283	879	0	7			58.7	No matches found	Multiple matches found	No matches found	No matches found	DDA for preferred ion	[M+H]+1	647110	195637	262085	8.44619e+06	8.58546e+06	6.33917e+06	345222	111187	790655	133435	294536	61620.4	160315	594891	557802	73561	180176	274872	463051	70335.6	178392	378715	189015	331231	357735
	TRUE	Massbank:FIO00405 N,N-Diethyl-4-hydroxybenzamide	C11 H15 N O2	Full match	No results	Full match	Partial match	No results	-0.65	193.11015	8.109	10767380.71	991	0	6			65.5	No matches found	Multiple matches found	No matches found	No matches found	DDA for preferred ion	[M+H]+1	370550	399360	391091	310483	649817	785086	4.32999e+06	9.09018e+06	397640	9.41965e+06	536202	330113	6.89604e+06	1.53347e+06	412970	6.07164e+06	1.07674e+07	512359	7.82704e+06	415100	2.34763e+06	2.98286e+06	5.20331e+06	6.50438e+06	405841
	TRUE	Massbank:LU030801 Lauryldiethanolamine|2-[dodecyl(2-hydroxyethyl)amino]ethanol	C16 H35 N O2	Full match	No results	Full match	Partial match	No results	-0.47	273.26665	13.096	5434893.644	12	0	4			73.5	Multiple matches found	Multiple matches found	No matches found	No matches found	DDA for preferred ion	[M+H]+1	1.40281e+06	624369	3.09422e+06	2.75164e+06	389046	497198	635769	515106	2.23245e+06	2.0669e+06	2.6228e+06	1.43534e+06	548250	433116	975151	552506	542128	578497	515950	379565	294979	573569	466261	439427	545574
	TRUE	Massbank:LU030801 Lauryldiethanolamine|2-[dodecyl(2-hydroxyethyl)amino]ethanol	C16 H35 N O2	Full match	No results	Full match	Partial match	No results	-0.21	273.26672	14.765	2510086.099	12	0	5			77.9	Multiple matches found	Multiple matches found	No matches found	No matches found	DDA for preferred ion	[M+H]+1	486757	229825	301734	293772	263037	264074	208069	223936	217730	429129	306490	201269	292629	164873	262395	345755	196391	310570	220642	181807	263185	298564	281924	1.06918e+06	325739
	TRUE	Massbank:LU030801 Lauryldiethanolamine|2-[dodecyl(2-hydroxyethyl)amino]ethanol	C16 H35 N O2	Full match	No results	Full match	Partial match	No results	-1.08	273.26648	14.449	2678553.436	12	0	4			71.3	Multiple matches found	Multiple matches found	No matches found	No matches found	DDA for preferred ion	[M+H]+1	176044	188646	382254	228106	136393	192555	309872	208735	264720	328486	226157	2.67855e+06	160905	150045	709194	306799	207042	275247	295045	184270	201077	181123	224464	220953	288246
	TRUE	Massbank:LU030801 Lauryldiethanolamine|2-[dodecyl(2-hydroxyethyl)amino]ethanol	C16 H35 N O2	Full match	No results	Full match	Partial match	No results	-0.56	273.26663	13.446	3812736.037	12	0	6			79.9	Multiple matches found	Multiple matches found	No matches found	No matches found	DDA for preferred ion	[M+H]+1	139912	208419	225905	153925	115137	124034	222972	754773	204956	206112	199015	125343	264887	116155	226733	225754	201203	139204	286249	119766	130548	223602	189101	113619	258612
	TRUE	Massbank:LU082301 Dibutyl phthalate|dibutyl benzene-1,2-dicarboxylate	C16 H22 O4	Full match	No results	Full match	Partial match	Full match	-1.09	278.15151	9.166	18453763.25	329	0	2			50.6	No matches found	Multiple matches found	No matches found	Multiple matches found	DDA for preferred ion	[M+Na]+1	1.15093e+06	1.28744e+06	1.0832e+06	1.04144e+06	1.02028e+06	2.59871e+06	965881	895907	4.65194e+06	1.26973e+06	1.14986e+06	1.15041e+06	693666	933239	1.2066e+06	2.02275e+06	955022	2.84155e+06	4.90335e+06	3.93689e+06	2.23864e+06	854999	1.26488e+06	2.30567e+06	1.53698e+06
	TRUE	Massbank:LU082501 Triphenylphosphine oxide|diphenylphosphorylbenzene	C18 H15 O P	Full match	No results	Full match	Partial match	No results	-1.23	278.08571	25.255	38156417.79	8	0	4			52.5	No matches found	Multiple matches found	No matches found	No matches found	DDA for preferred ion	[M+H]+1	123525	125547	128227	105898	119326	68727.8	127657	119031	120078	102264	3.81564e+07	120279	118970	137220	120861	135778	1.86869e+06	126483	2.10182e+06	127263	130442	126151	128064	124761	188619
	TRUE	Massbank:LU082501 Triphenylphosphine oxide|diphenylphosphorylbenzene	C18 H15 O P	Full match	No results	Full match	Partial match	No results	-1.01	278.08577	10.662	12465556.38	17	0	3			52.6	No matches found	Multiple matches found	No matches found	No matches found	DDA for preferred ion	[M+H]+1	207814	177931	1.16113e+07	162040	136287	163972	180258	6.17799e+06	271252	211765	161318	159530	196381	146878	210879	216750	121599	208302	185936	2.17143e+06	934258	209513	150286	122273	299056
	TRUE	Massbank:LU105104 Cinchophen|2-phenylquinoline-4-carboxylic acid	C16 H11 N O2	Full match	No results	Full match	Partial match	No results	-0.35	249.07889	18.007	25935833.15	125	0	1			50.7	No matches found	Single match found	No matches found	No matches found	DDA for preferred ion	[M+H]+1	2.09309e+07	2.51197e+07	2.26956e+07	45884.3	292706	392164	227793	200177	3.61259e+06	3.23436e+06	1.93585e+06	1.07143e+06	643714	1.0978e+06	626447	2.0672e+06	1.58538e+06	1.38972e+06	2.47938e+06	5.02069e+06	1.92e+06	261784	304678	304190	1.52033e+06
	TRUE	Massbank:LU111601 4-(Dimethylamino)phenylthiocyanate|Thiocyanic acid, 4-(dimethylamino)phenyl ester|[4-(dimethylamino)phenyl] thiocyanate	C9 H10 N2 S	Full match	No results	Full match	Partial match	No results	-1.56	178.05619	7.698	15135450.26	93	0	3			79.3	No matches found	Multiple matches found	No matches found	No matches found	DDA for preferred ion	[M+H]+1	3.18911e+06	4.42442e+06	2.55341e+06	2.31245e+06	816573	1.07825e+06	1.30667e+06	9.17111e+06	6.37004e+06	2.06261e+06	1.38159e+07	1.06958e+06	2.52849e+06	836730	2.87813e+06	1.1462e+06	1.12767e+06	1.51355e+07	934355	1.35093e+06	3.96547e+06	1.2425e+06	3.57488e+06	831935	9.63913e+06
	TRUE	Massbank:LU111601 4-(Dimethylamino)phenylthiocyanate|Thiocyanic acid, 4-(dimethylamino)phenyl ester|[4-(dimethylamino)phenyl] thiocyanate	C9 H10 N2 S	Full match	No results	Full match	Partial match	No results	-1.5	178.0562	7.578	16834404.26	93	0	4			79.2	No matches found	Multiple matches found	No matches found	No matches found	DDA for preferred ion	[M+H]+1	6.15828e+06	630035	1.35045e+07	888405	566007	3.48314e+06	1.00797e+06	6.94369e+06	711801	1.08136e+07	552687	1.6124e+06	638158	573934	1.23983e+07	2.01982e+06	677312	719868	615684	4.76751e+06	517194	2.46352e+06	1.71556e+06	587859	5.65266e+06
	TRUE	Massbank:LU111601 4-(Dimethylamino)phenylthiocyanate|Thiocyanic acid, 4-(dimethylamino)phenyl ester|[4-(dimethylamino)phenyl] thiocyanate	C9 H10 N2 S	Full match	No results	Full match	Partial match	No results	-1.18	178.05626	9.159	10507207.58	93	0	3			70.2	No matches found	Multiple matches found	No matches found	No matches found	DDA for preferred ion	[M+H]+1	510195	406272	560020	493680	570795	688438	487164	663676	2.43155e+06	653297	564523	793616	440535	587013	679800	643996	511333	1.88378e+06	3.57252e+06	1.41358e+06	751701	502537	548628	621235	986760
	TRUE	Massbank:LU111601 4-(Dimethylamino)phenylthiocyanate|Thiocyanic acid, 4-(dimethylamino)phenyl ester|[4-(dimethylamino)phenyl] thiocyanate	C9 H10 N2 S	Full match	No results	Full match	Partial match	No results	-1.14	178.05627	8.096	9039517.436	93	0	3			72.1	No matches found	Multiple matches found	No matches found	No matches found	DDA for preferred ion	[M+H]+1	710038	680983	839743	417683	706846	6.82776e+06	903698	1.02868e+06	787418	825038	1.0526e+06	2.79766e+06	3.74717e+06	980955	833778	7.9098e+06	742115	764869	836337	955932	740412	629920	970749	1.03888e+06	928160
	TRUE	Massbank:LU111601 4-(Dimethylamino)phenylthiocyanate|Thiocyanic acid, 4-(dimethylamino)phenyl ester|[4-(dimethylamino)phenyl] thiocyanate	C9 H10 N2 S	Full match	No results	Full match	Partial match	No results	-1.23	178.05625	7.876	15543176.37	93	0	3			74.3	No matches found	Multiple matches found	No matches found	No matches found	DDA for preferred ion	[M+H]+1	1.01152e+06	1.1116e+06	1.29244e+06	679829	2.4138e+06	708147	7.76054e+06	1.37792e+06	1.04636e+06	1.21118e+06	1.64326e+06	741015	802224	591130	1.31446e+06	737651	706720	1.16425e+06	3.12683e+06	627767	755709	758806	819184	8.54639e+06	1.55622e+06
	TRUE	Massbank:LU111601 4-(Dimethylamino)phenylthiocyanate|Thiocyanic acid, 4-(dimethylamino)phenyl ester|[4-(dimethylamino)phenyl] thiocyanate	C9 H10 N2 S	Unused	No results	Full match	Invalid mass	No results	-2.46	178.05603	7.502	10640302.54	6	0	3			72.4	No matches found	Multiple matches found	No matches found	No matches found	DDA for preferred ion	[M+H]+1	246050	223794	944464	194181	151832	986544	172363	201069	316101	62021.9	973064	247095	196066	177014	1.71876e+06	27219.6	327156	408136	192104	53225.6	135041	705861	51265.7	159096	116602
	TRUE	Massbank:LU111601 4-(Dimethylamino)phenylthiocyanate|Thiocyanic acid, 4-(dimethylamino)phenyl ester|[4-(dimethylamino)phenyl] thiocyanate	C9 H10 N2 S	Full match	No results	Full match	Partial match	No results	-1.1	178.05627	9.79	6286260.754	93	0	3			67.6	No matches found	Multiple matches found	No matches found	No matches found	DDA for preferred ion	[M+H]+1	2.10907e+06	6.28626e+06	704282	655303	1.03781e+06	534879	678331	909729	1.58961e+06	552126	1.63037e+06	794759	1.0358e+06	693030	665700	1.408e+06	6.06456e+06	635519	625495	957812	764881	805474	534531	2.04207e+06	865316
	TRUE	Massbank:LU111601 4-(Dimethylamino)phenylthiocyanate|Thiocyanic acid, 4-(dimethylamino)phenyl ester|[4-(dimethylamino)phenyl] thiocyanate	C9 H10 N2 S	Full match	No results	Full match	Partial match	No results	-0.23	178.05643	13.991	6168820.543	93	0	3			72.3	No matches found	Multiple matches found	No matches found	No matches found	DDA for preferred ion	[M+H]+1	318399	295847	356464	349685	278385	478114	449675	451292	466438	333375	358732	478520	489465	307118	366632	392948	479673	4.58941e+06	405415	399815	319481	402497	393038	331615	515616
	TRUE	Massbank:LU111601 4-(Dimethylamino)phenylthiocyanate|Thiocyanic acid, 4-(dimethylamino)phenyl ester|[4-(dimethylamino)phenyl] thiocyanate	C9 H10 N2 S	Full match	No results	Full match	Partial match	No results	-0.8	178.05633	10.433	6665082.638	93	0	3			78.3	No matches found	Multiple matches found	No matches found	No matches found	DDA for preferred ion	[M+H]+1	336078	459458	495848	448147	682304	412669	335828	445539	6.66508e+06	447294	582179	516093	555966	422398	544821	1.86881e+06	489036	399889	514124	476567	537853	3.59039e+06	1.52305e+06	475571	716215
	TRUE	Massbank:LU111601 4-(Dimethylamino)phenylthiocyanate|Thiocyanic acid, 4-(dimethylamino)phenyl ester|[4-(dimethylamino)phenyl] thiocyanate	C9 H10 N2 S	Full match	No results	Full match	Partial match	No results	-0.8	178.05633	8.762	7815130.217	93	0	3			69.8	No matches found	Multiple matches found	No matches found	No matches found	DDA for preferred ion	[M+H]+1	714548	577673	711241	606920	932597	691694	740983	6.06593e+06	789804	770905	857194	1.32311e+06	755648	706540	7.81513e+06	692315	1.50821e+06	703345	508872	1.15087e+06	995604	599444	783416	4.00264e+06	1.10187e+06
	TRUE	Massbank:LU111601 4-(Dimethylamino)phenylthiocyanate|Thiocyanic acid, 4-(dimethylamino)phenyl ester|[4-(dimethylamino)phenyl] thiocyanate	C9 H10 N2 S	Full match	No results	Full match	Partial match	No results	-1.05	178.05628	8.937	9921861.865	93	0	3			78.7	No matches found	Multiple matches found	No matches found	No matches found	DDA for preferred ion	[M+H]+1	993120	2.2936e+06	1.00707e+06	864638	1.36901e+06	3.92072e+06	864844	1.19257e+06	995162	3.16543e+06	1.17764e+06	4.02878e+06	838378	674026	2.43153e+06	959647	1.01975e+06	881583	969650	1.42366e+06	1.17145e+06	857000	5.68284e+06	1.25722e+06	9.92186e+06
	TRUE	Massbank:LU111601 4-(Dimethylamino)phenylthiocyanate|Thiocyanic acid, 4-(dimethylamino)phenyl ester|[4-(dimethylamino)phenyl] thiocyanate	C9 H10 N2 S	Full match	No results	Full match	Partial match	No results	-0.88	178.05631	12.12	6874821.554	93	0	3			79.8	No matches found	Multiple matches found	No matches found	No matches found	DDA for preferred ion	[M+H]+1	360965	503328	501399	348573	672363	764332	505132	453211	2.75361e+06	439724	488667	447636	640090	526215	556738	565022	545830	694198	585362	6.87482e+06	554932	5.8075e+06	361608	592490	625190
	TRUE	Massbank:LU111601 4-(Dimethylamino)phenylthiocyanate|Thiocyanic acid, 4-(dimethylamino)phenyl ester|[4-(dimethylamino)phenyl] thiocyanate	C9 H10 N2 S	Full match	No results	Full match	Partial match	No results	-0.57	178.05637	13.245	4940438.11	93	0	3			79	No matches found	Multiple matches found	No matches found	No matches found	DDA for preferred ion	[M+H]+1	204666	205033	376420	256903	283517	320204	329414	299294	2.43335e+06	219905	282259	231114	290187	198471	346958	257348	4.94044e+06	331400	250275	256343	1.09474e+06	304703	1.64869e+06	196349	271867
	TRUE	Massbank:LU111601 4-(Dimethylamino)phenylthiocyanate|Thiocyanic acid, 4-(dimethylamino)phenyl ester|[4-(dimethylamino)phenyl] thiocyanate	C9 H10 N2 S	Full match	No results	Full match	Partial match	No results	-0.99	178.05629	7.664	14948297.53	93	0	3			72.4	No matches found	Multiple matches found	No matches found	No matches found	DDA for preferred ion	[M+H]+1	6.61967e+06	6.16515e+06	2.22546e+06	2.57481e+06	679851	663802	833743	937102	998682	1.72205e+06	1.18703e+07	687597	972830	544754	2.79487e+06	1.01891e+06	913753	107652	584250	1.28439e+06	3.51691e+06	885239	2.87281e+06	556941	1.49483e+07
	TRUE	Massbank:LU111601 4-(Dimethylamino)phenylthiocyanate|Thiocyanic acid, 4-(dimethylamino)phenyl ester|[4-(dimethylamino)phenyl] thiocyanate	C9 H10 N2 S	Full match	No results	Full match	Partial match	No results	-1.24	178.05625	11.411	5399880.375	93	0	3			77.6	No matches found	Multiple matches found	No matches found	No matches found	DDA for preferred ion	[M+H]+1	407617	593127	330035	642878	491765	4.13737e+06	552382	3.15667e+06	3.09713e+06	482044	413774	323955	403591	286068	2.59379e+06	552647	432653	523970	434121	562453	505458	5.39988e+06	297607	501943	711856
	TRUE	Massbank:LU111601 4-(Dimethylamino)phenylthiocyanate|Thiocyanic acid, 4-(dimethylamino)phenyl ester|[4-(dimethylamino)phenyl] thiocyanate	C9 H10 N2 S	Full match	No results	Full match	Partial match	No results	-0.71	178.05634	8.879	5658485.701	93	0	1			53.4	No matches found	Single match found	No matches found	No matches found	DDA for preferred ion	[M+H]+1	527797	2.2936e+06	572091	438262	646425	3.46553e+06	449272	730921	426055	430670	551139	366478	838378	674026	2.43153e+06	448310	369138	364297	317936	741473	664808	451112	5.65849e+06	598781	404917
	TRUE	Massbank:LU118901 Diisobutyl phthalate	C16 H22 O4	Full match	No results	Full match	Partial match	Full match	-1.52	278.15139	7.511	33549331.72	329	0	5			55.6	No matches found	Multiple matches found	No matches found	Multiple matches found	DDA for preferred ion	[M+Na]+1	829426	739547	8.94881e+06	880893	837159	5.62787e+06	2.61307e+06	1.23132e+06	1.01326e+06	6.47649e+06	3.67029e+06	3.79933e+06	1.0229e+06	910942	1.15495e+06	855918	1.03974e+06	2.46201e+06	930366	2.03731e+06	745661	1.36915e+06	364579	942385	736557
	TRUE	Massbank:PR300049 Sempervirine	C19 H16 N2	Full match	No results	Full match	Partial match	No results	0.39	272.13145	16.014	25374216.66	53	0	3			61.8	No matches found	Multiple matches found	No matches found	No matches found	DDA for preferred ion	[M+H]+1	613617	98755.9	155397	2.53742e+07	2.49871e+07	2.1125e+07	147272	149375	3.96514e+06	152003	147309	129072	147647	118236	146773	210107	120521	149396	131668	113282	143856	915136	562595	547105	135883
	TRUE	Massbank:PR300851 Harmine	C13 H12 N2 O	Full match	No results	Full match	Partial match	No results	-0.65	212.09483	9.473	592537.9847	331	0	10			61.9	No matches found	Multiple matches found	No matches found	No matches found	DDA for preferred ion	[M+H]+1	113299	487276	586167	395376	206436	385035	60618.7	63114.4	66073	59663.3	58487.2	59217.7	98716.4	69821.2	101100	592538	65925.1	64331.5	81225.1	161082	67329.8	97104.9	47438.2	69710.6	59404
	TRUE	Massbank:UF419401 Triphenylphosphine oxid|diphenylphosphorylbenzene	C18 H15 O P	Not the top hit	No results	Full match	Partial match	No results	-1.43	278.08565	7.553	48475577.45	8	0	6			59.3	No matches found	Multiple matches found	No matches found	No matches found	DDA for preferred ion	[M+H]+1	7.82488e+06	141290	2.13691e+07	1.45351e+06	1.05167e+06	1.9799e+06	1.31478e+06	1.90651e+07	1.13207e+06	2.21902e+07	1.9834e+07	1.89922e+06	1.03828e+06	914872	9.69072e+06	1.44561e+06	1.05238e+06	1.23601e+06	1.11454e+06	5.18353e+06	8.06473e+06	1.03144e+06	2.0063e+06	980081	9.30446e+06
	TRUE	Massbank:UF419401 Triphenylphosphine oxid|diphenylphosphorylbenzene	C18 H15 O P	Full match	No results	Full match	Partial match	No results	-0.22	278.08599	13.984	15068495.57	17	0	2			54.2	No matches found	Multiple matches found	No matches found	No matches found	DDA for preferred ion	[M+H]+1	229392	240730	216969	233121	240852	217240	6.0196e+06	285803	315249	241945	329223	329850	281847	227232	261149	248972	247341	7.35136e+06	245182	241795	221030	241489	303645	272079	274570
	TRUE	Massbank:UF419401 Triphenylphosphine oxid|diphenylphosphorylbenzene	C18 H15 O P	Full match	No results	Full match	Partial match	No results	-1.59	278.08561	8.539	16755245.24	8	0	6			57.1	No matches found	Multiple matches found	No matches found	No matches found	DDA for preferred ion	[M+H]+1	224728	258963	247261	229195	263721	220938	85340.4	238469	239444	275304	272406	210949	221413	231913	216895	232629	246593	122539	215186	2.04433e+06	195538	227396	245434	189957	367176
	TRUE	Massbank:UF419401 Triphenylphosphine oxid|diphenylphosphorylbenzene	C18 H15 O P	Full match	No results	Full match	Partial match	No results	-0.81	278.08583	14.745	10129047.3	8	0	1			51.6	No matches found	Single match found	No matches found	No matches found	DDA for preferred ion	[M+H]+1	8.1335e+06	125604	195411	173450	199268	96110.8	145507	175919	179791	231759	164632	130278	50953.8	2.01656e+06	175252	173661	167073	86840	156797	166360	166293	180417	189028	2.76776e+06	177687
	TRUE	Massbank:UF419401 Triphenylphosphine oxid|diphenylphosphorylbenzene	C18 H15 O P	Full match	No results	Full match	Partial match	No results	-1.09	278.08575	12.123	9705143.541	8	0	9			61.2	No matches found	Multiple matches found	Single match found	No matches found	DDA for preferred ion	[M+H]+1	140891	143140	148318	176305	154347	151782	299697	191726	4.81944e+06	179027	158581	172932	216365	208640	1.0233e+06	215343	160516	215981	209900	9.70514e+06	177859	9.35147e+06	161367	153235	178858
	TRUE	Massbank:UF419401 Triphenylphosphine oxid|diphenylphosphorylbenzene	C18 H15 O P	Full match	No results	Full match	Partial match	No results	-1.04	278.08576	8.762	12502511.23	8	0	1			51.1	No matches found	Single match found	No matches found	No matches found	DDA for preferred ion	[M+H]+1	443163	163984	1.56609e+06	138911	115359	140698	164588	1.09443e+07	200587	1.9366e+06	214432	1.79338e+06	1.85846e+06	166243	1.14498e+07	157074	1.33961e+06	160197	210011	234399	224340	149017	229905	3.75056e+06	1.8857e+06
	TRUE	Massbank:UF419401 Triphenylphosphine oxid|diphenylphosphorylbenzene	C18 H15 O P	Not the top hit	No results	Full match	Partial match	No results	-1.16	278.08573	12.515	5680045.735	8	0	6			55.9	No matches found	Multiple matches found	No matches found	No matches found	DDA for preferred ion	[M+H]+1	133439	147990	5.68005e+06	139691	162762	105552	415122	192804	170251	145559	128000	160717	130348	189927	216401	165618	180616	103914	219944	140607	157138	94565.7	116922	129683	250443
	TRUE	Massbank:UF419401 Triphenylphosphine oxid|diphenylphosphorylbenzene	C18 H15 O P	Not the top hit	No results	Full match	Partial match	No results	-0.9	278.0858	8.53	16755267.98	8	0	1			51.9	No matches found	Single match found	No matches found	No matches found	DDA for preferred ion	[M+H]+1	153639	188131	167694	171281	203321	169933	85340.4	157707	152734	203071	200118	118185	127300	233627	151303	173518	182303	122539	156941	2.06625e+06	139079	159163	166793	133681	288927
	TRUE	MassbankEU:SM818501 Di(2-ethylhexyl)phthalate (DEHP)|DEHP|Bis(2-ethylhexyl) benzene-1,2-dicarboxylate	C24 H38 O4	Not the top hit	No results	Full match	Partial match	Full match	-0.36	390.27687	20.516	251190624	163	0	6			72.6	No matches found	Multiple matches found	Single match found	Multiple matches found	DDA for preferred ion	[M+H]+1	1.79693e+08	2.1924e+08	251190624	9.83457e+06	7.54445e+06	8.24988e+06	1.99518e+07	2.256e+07	2.78763e+07	1.42857e+07	1.41204e+07	1.29203e+07	1.55815e+07	1.60724e+07	1.67631e+07	2.61897e+07	2.50978e+07	1.71906e+08	1.59183e+07	1.42975e+07	1.38801e+07	8.7827e+06	9.18267e+06	1.02762e+07	1.87615e+07
	TRUE	MassbankEU:SM826601 Cyclohexylamine	C6 H13 N	Full match	No results	Full match	Partial match	Full match	-1.39	99.10466	25.255	34328039.53	91	0	1			50.3	No matches found	No matches found	Single match found	Single match found	DDA for preferred ion	[M+H]+1	2.65273e+06	2.35317e+06	2.26383e+06	2.23154e+06	2.53227e+06	2.21056e+06	2.26073e+06	822107	2.33787e+06	700323	3.4328e+07	1.1226e+06	1.9433e+06	5.18566e+06	1.80078e+06	2.17466e+06	1.98616e+06	2.4225e+06	2.31019e+06	2.51696e+06	2.2939e+06	1.63431e+06	2.2456e+06	2.22458e+06	2.16102e+06
	TRUE	MassbankEU:SM826601 Cyclohexylamine	C6 H13 N	Full match	No results	Full match	Partial match	Full match	-0.78	99.10472	8.293	10641098.12	91	0	1			50.4	No matches found	No matches found	Single match found	Single match found	DDA for preferred ion	[M+H]+1	820599	847654	6.95174e+06	8.22549e+06	8.90627e+06	200432	6.96299e+06	830058	697294	577405	671209	647015	718141	5.73071e+06	916457	945943	721300	489642	594734	679697	581130	1.06411e+07	588202	745505	3.84431e+06
	TRUE	MassbankEU:SM826601 Cyclohexylamine	C6 H13 N	Full match	No results	Full match	Partial match	Full match	-0.83	99.10472	9.832	9165968.218	91	0	1			50.9	No matches found	No matches found	Single match found	Single match found	DDA for preferred ion	[M+H]+1	1.5475e+06	9.07764e+06	822205	941064	589813	814157	969702	1.35773e+06	1.35948e+06	993898	5.23657e+06	1.15983e+06	1.18156e+06	963417	888350	3.03241e+06	7.70774e+06	2.74205e+06	954326	1.18546e+06	1.05087e+06	1.33125e+06	1.80405e+06	2.03031e+06	1.24362e+06
	TRUE	MassbankEU:SM826601 Cyclohexylamine	C6 H13 N	Full match	No results	Full match	Partial match	Full match	-2.05	99.1046	7.853	19451092.42	91	0	1			53.5	No matches found	No matches found	Single match found	Single match found	DDA for preferred ion	[M+H]+1	335197	559377	425097	336901	3.25265e+06	283007	7.65429e+06	712719	572435	417938	547626	247812	359501	251134	386685	426404	8.28906e+06	408604	3.49683e+06	258374	352835	291040	403914	60236.3	499908
	TRUE	MassbankEU:SM826601 Cyclohexylamine	C6 H13 N	Full match	No results	Full match	Partial match	Full match	-0.93	99.10471	6.783	21341121.7	91	0	1			54.8	No matches found	No matches found	Single match found	Single match found	DDA for preferred ion	[M+H]+1	209023	135425	3.65564e+06	122509	151593	265786	49615.9	2.43146e+06	232188	118422	132806	250853	198274	28203.6	137095	227672	94362.4	2.76769e+06	222332	182876	113021	44129.6	2.13411e+07	67731.9	119721
	TRUE	MassbankEU:SM826601 Cyclohexylamine	C6 H13 N	Full match	No results	Full match	Partial match	Full match	-1.12	99.10469	8.405	6962994.864	91	0	1			53.3	No matches found	No matches found	Single match found	Single match found	DDA for preferred ion	[M+H]+1	983015	443920	488942	499551	571049	574249	6.96299e+06	517641	405953	501726	446139	297145	327009	828876	368733	377282	341233	1.41971e+06	490202	312727	393315	440421	345465	307145	3.84431e+06
	TRUE	N,N'-Dicyclohexylurea	C13 H24 N2 O	Full match	Full match	No results	Full match	Full match	-0.06	224.18885	11.165	1372040.337	69	1	0	77.7	58.7		No matches found	No matches found	No matches found	Single match found	DDA for preferred ion	[M+H]+1	42956.7	56647.3	52435.4	43321.5	48747.4	34299.3	48722.8	44713.3	45123.7	61529.2	60738	51362.3	55688.7	65830.8	63399.3	62444.3	63861.7	54918.6	67793.2	61482.9	61298	64706.7	66315.4	67971.1	629058
	TRUE	N,N'-Dicyclohexylurea	C13 H24 N2 O	Full match	Full match	No results	Full match	Full match	-0.3	224.1888	12.038	2838221.638	69	1	0	52.5	44.9		No matches found	No matches found	No matches found	Single match found	DDA for preferred ion	[M+H]+1	25361.5	134922	107530	2.01349e+06	2.83822e+06	2.37179e+06	131753	111659	121611	121950	123039	122361	130072	126347	107037	217205	131301	134947	126078	1.12348e+06	115725	108605	84795.2	128716	128065
	TRUE	N,N'-Diphenylguanidine	C13 H13 N3	Full match	Full match	Full match	Full match	Full match	-0.34	211.11088	6.27	82469184.98	94	2	13	91.7	78	92.2	Single match found	Multiple matches found	No matches found	Single match found	DDA for preferred ion	[M+H]+1	943401	922367	721248	7.16229e+07	8.24692e+07	6.31712e+07	2.6701e+06	1.12134e+06	856463	513393	1.12666e+06	387598	343121	544356	402658	1.70628e+06	6.25795e+07	1.43995e+06	490236	400370	498632	372773	251122	397352	484289
	TRUE	Neocuproine	C14 H12 N2	Full match	Full match	Full match	Full match	No results	0.99	208.10025	7.222	1070097.082	163	1	7	58.7	7.9	76	No matches found	Multiple matches found	No matches found	No matches found	DDA for preferred ion	[M+H]+1	66482.4	638629	742137	237776	136139	169874	113379	49701.3	97588.9	72022.3	66428.4	98643.5	531717	715440	686690	201228	766429	301826	305609	248206	170990	1.0701e+06	430542	983831	40118
	TRUE	Octrizole	C20 H25 N3 O	Full match	Full match	Full match	Not the top hit	No results	-0.24	323.19968	21.063	724923233.3	94	4	9	92.3	9.6	87.1	Single match found	Multiple matches found	No matches found	No matches found	DDA for preferred ion	[M+H]+1	311669	321778	306161	321293	316769	298362	314334	316565	317601	321700	310688	336875	323512	318060	339168	264744	303478	322006	308543	314813	319305	324639	315078	344903	326374
	TRUE	Stearoyl Ethanolamide	C20 H41 N O2	Full match	No results	Full match	Partial match	No results	0.06	327.31375	20.062	6042398.082	37	0	2			68.4	Multiple matches found	No matches found	No matches found	No matches found	DDA for preferred ion	[M+H]+1	445532	616615	138396	5.73001e+06	5.84511e+06	6.0424e+06	600288	552162	256177	467476	560474	507888	421799	388161	398566	1.94528e+06	567495	115807	501384	372815	380677	670406	529628	454138	431750
	TRUE	Triphenylphosphine oxide	C18 H15 O P	Full match	Full match	Full match	Full match	No results	-0.83	278.08582	7.285	3417466.542	8	3	13	84.9	52.9	83.8	No matches found	Multiple matches found	Multiple matches found	No matches found	DDA for preferred ion	[M+H]+1	134411	165358	135112	161080	129500	142374	94267.6	121696	190006	164285	99120.2	177751	119415	102527	148753	139191	107779	108488	141202	123666	115848	127187	157399	106455	109787
	TRUE	Triphenylphosphine oxide	C18 H15 O P	Not the top hit	Full match	Full match	Full match	No results	-1.41	278.08566	6.887	58692624.4	8	2	12	85.6	53.4	88.3	No matches found	Multiple matches found	Multiple matches found	No matches found	DDA for preferred ion	[M+H]+1	2.73233e+06	7.29071e+06	44557.5	3.09752e+06	185413	30313.7	226357	1.26874e+07	163329	3.40276e+06	174293	175392	269618	31604.6	189982	141367	1.43425e+07	253585	9.23111e+06	177333	2.17476e+06	146989	78808.5	5.59813e+06	183316
	TRUE	Triphenylphosphine oxide	C18 H15 O P	Full match	Full match	Full match	Full match	No results	-1.09	278.08575	9.812	18203436.86	8	2	12	77.8	48.8	79.6	No matches found	Multiple matches found	Multiple matches found	No matches found	DDA for preferred ion	[M+H]+1	1.61439e+06	1.47535e+07	197980	187105	674663	132446	205944	260486	434020	162237	1.0048e+06	205058	171894	129829	191560	313972	7.3063e+06	1.21174e+06	133659	154927	222349	562712	1.46486e+06	1.52495e+06	177675
	TRUE	Triphenylphosphine oxide	C18 H15 O P	Full match	Full match	Full match	Full match	No results	-1.38	278.08567	7.658	19030059.59	8	2	12	72.6	45.7	79.8	No matches found	Multiple matches found	Multiple matches found	No matches found	DDA for preferred ion	[M+H]+1	6.03056e+06	4.12375e+06	70930.4	427850	253390	282704	184835	257438	246126	56858	1.90301e+07	261287	230974	172489	513602	67487.5	224530	222427	225387	345145	1.06708e+07	288385	1.60962e+06	189482	1.30214e+07
	TRUE	Triphenylphosphine oxide	C18 H15 O P	Not the top hit	Full match	Full match	Partial match	No results	-0.36	278.08595	10.421	14480878.57	17	2	12	79.3	49.7	84.6	No matches found	Multiple matches found	Multiple matches found	No matches found	DDA for preferred ion	[M+H]+1	134643	104914	231062	168205	184700	216703	190879	194188	1.44809e+07	202665	219140	198074	130124	144057	158327	1.1169e+06	198295	139477	182660	123793	285254	4.10259e+06	1.05214e+06	157067	407595
	TRUE	Triphenylphosphine oxide	C18 H15 O P	Not the top hit	Full match	Full match	Full match	No results	-0.9	278.0858	8.88	5868515.72	8	2	12	72.7	45.8	75.1	No matches found	Multiple matches found	Multiple matches found	No matches found	DDA for preferred ion	[M+H]+1	218443	229244	261563	219838	359711	2.98912e+06	259993	391950	290834	1.93705e+06	326376	449517	1.85846e+06	216649	310211	223113	283417	238414	270971	225462	280142	201655	3.70034e+06	306413	5.86852e+06
	TRUE	Triphenylphosphine oxide	C18 H15 O P	Full match	Full match	Full match	Full match	No results	-0.27	278.08598	8.673	3476871.373	8	2	12	79.8	49.9	81.4	No matches found	Multiple matches found	Multiple matches found	No matches found	DDA for preferred ion	[M+H]+1	89027.2	91015.5	1.56609e+06	98931.8	121050	116961	147061	2.2674e+06	168194	121733	140000	141490	982285	157195	75558.8	94047.3	376371	104565	75562.9	221952	708905	92938.4	69165.3	160121	1.09565e+06
	TRUE	Triphenylphosphine oxide	C18 H15 O P	Not the top hit	Full match	Full match	Full match	No results	-1	278.08577	7.825	32918294.17	8	1	12	55.2	41.8	65.8	No matches found	Multiple matches found	Multiple matches found	No matches found	DDA for preferred ion	[M+H]+1	128995	215944	58743.7	165334	3.08344e+06	988617	7.27692e+06	1.06546e+07	9.42052e+06	171356	211423	127051	165193	126940	116754	210128	145011	141086	4.53533e+06	146690	1.71592e+06	736908	162314	7.70683e+06	265821
	TRUE	Triphenylphosphine oxide	C18 H15 O P	Not the top hit	Full match	Full match	Full match	No results	-1.25	278.0857	11.423	10571027.95	8	1	12	69.1	44.1	74	No matches found	Multiple matches found	Multiple matches found	No matches found	DDA for preferred ion	[M+H]+1	164279	178376	118446	329830	2.19837e+06	4.6385e+06	190296	1.0571e+07	8.44897e+06	180726	191224	145455	139027	123045	3.21569e+06	116449	108978	137920	609220	129378	181623	5.17524e+06	129432	109010	174612
	TRUE	Triphenylphosphine oxide	C18 H15 O P	Full match	Full match	Full match	Full match	No results	-0.72	278.08585	9.687	4494548.334	8	1	12	59.8	42.5	73.6	No matches found	Multiple matches found	Multiple matches found	No matches found	DDA for preferred ion	[M+H]+1	220063	235433	292361	231312	265795	202070	266764	96209.7	810999	189258	208151	2.19387e+06	230505	242329	217799	313972	188992	241042	307650	173287	246940	523593	209873	331526	377315
	TRUE	Tris(2-ethylhexyl) phosphate	C24 H51 O4 P	Not the top hit	Full match	No results	Full match	No results	-0.24	434.35239	22.058	80097409.41	9	1	0	66.9	8.3		No matches found	No matches found	No matches found	No matches found	DDA for preferred ion	[M+H]+1	452044	122482	477055	6.75392e+07	8.00974e+07	6.90502e+07	2.80689e+06	2.75294e+06	4.02709e+06	440922	454143	450193	454089	457916	445600	2.55548e+07	1.57587e+07	1.60702e+07	424330	471578	464122	428477	423025	509835	489332
	TRUE	Uric acid	C5 H4 N4 O3	Full match	Full match	Full match	Full match	No results	-0.21	168.0283	1.913	2567230.969	15	1	8	60.2	46.3	71	Multiple matches found	Multiple matches found	No matches found	No matches found	DDA for preferred ion	[M+H]+1	142664	142973	144896	145133	145931	144471	131063	150751	139433	2.16211e+06	769991	2.56723e+06	138094	141354	139008	142305	144952	146629	141722	481229	142780	142839	140334	142800	135042
	TRUE	UROCANATE - 20.0 eV	C6 H6 N2 O2	Full match	No results	Full match	Partial match	No results	-0.22	138.0429	8.386	299397.0721	188	0	1			50.3	Single match found	No matches found	No matches found	No matches found	DDA for preferred ion	[M+H]+1	69610.7	116557	70393.1	45969.4	49147.4	229973	216973	47450.8	46999.7	48648.6	45579.2	54525.7	50770.2	53937.3	62486.5	53037.9	51382.9	44592.2	67391.3	38122.9	48918.1	47494.2	44958.8	45630.8	54745.3
	TRUE	UROCANATE - 20.0 eV	C6 H6 N2 O2	Full match	No results	Full match	Partial match	No results	-0.44	138.04287	9.033	396085.8572	188	0	2			51.6	Multiple matches found	No matches found	No matches found	No matches found	DDA for preferred ion	[M+H]+1	93376.1	70303	61876.9	38166	67912.9	396086	63690.3	62732.6	56887.8	61577.9	107886	63369.2	46935.6	59309.9	43033.7	58797.9	65866.2	122044	49612.6	75108.6	67986.4	60250.4	67154.9	63306.7	50331.5
	TRUE	UROCANATE - 20.0 eV	C6 H6 N2 O2	Full match	No results	Full match	Partial match	No results	0.63	138.04301	10.478	535717.0826	188	0	2			50.7	Multiple matches found	No matches found	No matches found	No matches found	DDA for preferred ion	[M+H]+1	36122.8	49202.3	437567	51669.7	56650	48763.7	34142.7	48349.7	42014.4	50747.1	56711.1	64243.1	50168.1	50219.1	49839.4	52066.6	535717	47207.7	64269.6	50872.5	29784.6	54196	50348	48037.4	52555.8
[truncated: 72 more columns]

## Sheet: Nontarget - Level 3
tags	checked	predicted_name	formula	annotated_source_predicted_compositions	annotated_source_mzcloud	annotated_source_mzvault	annotated_source_chemspider	annotated_source_masslist	annotated_delta_mass_ppm	calc_mw	rt_min	area_max	num_chemspider_results	num_mzcloud_results	num_mzvault_results	mzcloud_best_match	mzcloud_best_match_confidence	mzVault Best Match	mzVault Library Match: GNPS	mzVault Library Match: MassBank	mzVault Library Match: MassBankEU	match_cr_list	MS2	ref_ion	Area: BAS-A.raw (F7)	Area: BAS-B.raw (F8)	Area: BAS-C.raw (F9)	Area: CMT-A-F.raw (F10)	Area: CMT-B-F.raw (F11)	Area: CMT-C-F.raw (F12)	Area: GRI-A.raw (F13)	Area: GRI-B.raw (F14)	Area: GRI-C.raw (F15)	Area: JER-A.raw (F16)	Area: JER-B.raw (F17)	Area: JER-C.raw (F18)	Area: KIR-A-F.raw (F19)	Area: KIR-B-F.raw (F20)	Area: KIR-C-F.raw (F21)	Area: KIT-A-F.raw (F22)	Area: KIT-B-F.raw (F23)	Area: KIT-C-F.raw (F24)	Area: THU-A.raw (F32)	Area: THU-B.raw (F33)	Area: THU-C.raw (F34)	Area: UNA-A-F.raw (F35)	Area: UNA-B-F.raw (F36)	Area: UNA-C-F.raw (F37)	Area: WIN-A.raw (F41)
	TRUE	Dimethylaminopropyl Methacrylamide	C9 H18 N2 O	Full match	No results	No results	Full match	No results	-1.96	170.14158	7.567	224924213.1	256	0	0				No matches found	No matches found	No matches found	No matches found	DDA for preferred ion	[M+H]+1	5.47644e+06	4.02453e+06	167689379	4.11252e+06	2.60659e+06	2.43853e+07	7.80332e+06	1.36529e+08	4.84012e+06	1.38901e+08	5.61457e+06	8.91487e+06	3.39856e+06	2.99597e+06	173173950	2.15626e+07	4.71752e+06	4.48233e+06	3.41187e+06	5.38738e+07	177376	3.27611e+07	4.63161e+07	62762.3	5.3418e+07
	TRUE	Dimethylaminopropyl Methacrylamide	C9 H18 N2 O	Full match	No results	No results	Full match	No results	-1.82	170.1416	9.147	120651475.1	256	0	0				No matches found	No matches found	No matches found	No matches found	DDA for preferred ion	[M+H]+1	6.39489e+06	3.50872e+06	6.48437e+06	4.79244e+06	5.46319e+06	5.83294e+06	5.00924e+06	168006	154693	8.0878e+06	5.73864e+06	7.11471e+06	5.53606e+06	5.63444e+06	5.96314e+06	4.96333e+06	5.26888e+06	1.79474e+07	3.49659e+07	8.56189e+06	6.32112e+06	4.85504e+06	6.89558e+06	6.57177e+06	8.0717e+06
	TRUE	TEMPO	C9 H19 N O	Full match	No results	No results	Full match	No results	-1.5	157.14643	6.921	111935956.4	247	0	0				No matches found	No matches found	No matches found	No matches found	DDA for preferred ion	[M+ACN+H]+1	4.76838e+07	2.10738e+07	1.06296e+06	4.17861e+07	8.08453e+06	1.63058e+06	2.01009e+06	370527	1.42462e+07	2.74425e+06	973844	5.61252e+06	5.59183e+06	3.07259e+06	830407	6.90034e+06	4.66545e+07	2.11986e+06	2.18767e+06	877106	9.78947e+06	2.07353e+06	1.68097e+06	1.04214e+07	1.02049e+06
	TRUE	Cyclobutane	C4 H8	Full match	No results	No results	Full match	No results	-2.44	56.06246	11.888	95183687.25	8	0	0				No matches found	No matches found	No matches found	No matches found	No MS2	[M+NH4]+1	3.49716e+06	2.80658e+07	2.35174e+07	3.42803e+06	2.32701e+07	1.04734e+07	3.00636e+06	4.57456e+06	5.41763e+06	4.64493e+06	3.44447e+06	3.05761e+06	3.34676e+07	3.64799e+06	3.63334e+06	1.38575e+07	5.04556e+06	9.51837e+07	4.82528e+06	4.36548e+06	2.53148e+07	3.4975e+06	3.20421e+06	5.17091e+07	4.97783e+06
	TRUE	Cyclobutane	C4 H8	Full match	No results	No results	Full match	No results	-1.71	56.0625	12.675	107632528.5	8	0	0				No matches found	No matches found	No matches found	No matches found	No MS2	[M+NH4]+1	2.97671e+07	4.80662e+06	4.9683e+06	5.38545e+06	6.02636e+07	24954871	1.07633e+08	2.78782e+07	5.85833e+06	6.27354e+06	4.76015e+06	4.80386e+06	2.8443e+07	4.75216e+06	4.73753e+06	4.59909e+06	5.17583e+06	5.27768e+06	5.92003e+06	5.52382e+06	4.37207e+06	4.39113e+06	5.41394e+06	4.76253e+06	5.84838e+06
	TRUE	Cyclobutane	C4 H8	Full match	No results	No results	Full match	No results	-2.43	56.06246	9.82	79434458.73	8	0	0				No matches found	No matches found	No matches found	No matches found	No MS2	[M+NH4]+1	1.18394e+07	7.94345e+07	4.52448e+06	4.79566e+06	4.52606e+06	4.51033e+06	5.69747e+06	8.46882e+06	9.34758e+06	5.35153e+06	3.75689e+07	6.73771e+06	6.28089e+06	5.4473e+06	4.43992e+06	6.32468e+06	4.84458e+07	2.20372e+07	5.01374e+06	5.5912e+06	7.72561e+06	4.54635e+06	2.88305e+07	1.40103e+07	7.88399e+06
	TRUE	Dimethylaminopropyl Methacrylamide	C9 H18 N2 O	Full match	No results	No results	Full match	No results	-1.43	170.14167	9.813	82474956.72	256	0	0				No matches found	No matches found	No matches found	No matches found	DDA for preferred ion	[M+H]+1	1.83743e+07	7.23429e+07	7.76904e+06	7.3759e+06	6.11382e+06	5.70476e+06	7.54197e+06	9.04661e+06	1.09713e+07	5.99581e+06	2.25114e+07	7.6012e+06	7.48558e+06	6.93537e+06	7.01222e+06	4.26175e+06	4.68369e+07	2.28252e+07	5.88356e+06	9.88976e+06	6.40532e+06	4.60801e+06	3.65004e+06	2.03947e+07	8.56493e+06
	TRUE	Cyclobutane	C4 H8	Full match	No results	No results	Full match	No results	-2.02	56.06249	12.115	80849040.17	8	0	0				No matches found	No matches found	No matches found	No matches found	No MS2	[M+NH4]+1	3.82689e+06	5.03877e+06	3.7181e+06	6.13334e+06	5.29378e+06	5.60093e+06	5.48759e+06	4.31938e+06	2.73849e+07	4.38657e+06	4.0792e+06	3.86897e+06	5.35828e+06	4.91774e+06	4.36654e+06	5.05861e+06	6.11447e+06	5.61077e+06	5.97588e+06	8.0849e+07	4.90437e+06	6.5611e+07	3.87073e+06	6.52969e+06	6.47848e+06
	TRUE	Cyclobutane	C4 H8	Full match	No results	No results	Full match	No results	-1.57	56.06251	10.65	66677265.72	8	0	0				No matches found	No matches found	No matches found	No matches found	No MS2	[M+NH4]+1	2.91437e+06	4.59702e+06	833702	4.11522e+06	6.36739e+06	4.94304e+06	4.41326e+06	3.81532e+07	4.405e+06	4.76204e+06	3.29126e+06	4.76037e+06	5.37277e+06	4.76261e+06	4.37738e+06	4.81307e+06	4.23889e+06	4.83543e+07	5.76166e+06	5.67916e+07	2.27136e+07	4.6973e+06	4.53086e+06	4.60694e+06	6.23056e+06
	TRUE	Cyclobutane	C4 H8	Full match	No results	No results	Full match	No results	-1.55	56.06251	10.463	91757783.8	8	0	0				No matches found	No matches found	No matches found	No matches found	No MS2	[M+NH4]+1	4.37007e+06	4.1715e+06	3.27958e+06	4.36784e+06	2.48043e+07	5.24139e+06	5.30383e+06	6.69665e+06	9.17578e+07	6.58712e+06	7.50935e+06	6.70359e+06	5.08705e+06	5.12604e+06	6.04474e+06	6.43325e+06	4.28141e+06	5.69258e+06	5.06189e+06	5.67916e+07	4.2165e+06	6.25431e+06	9.60542e+06	5.93997e+06	9.5648e+06
	TRUE	Cyclobutane	C4 H8	Full match	No results	No results	Full match	No results	-1.87	56.0625	14.746	59906956.67	8	0	0				No matches found	No matches found	No matches found	No matches found	No MS2	[M+NH4]+1	5.9907e+07	3.89086e+06	4.2651e+06	3.74986e+06	4.23165e+06	4.82689e+06	5.69033e+06	4.36712e+06	4.25207e+06	3.95208e+06	3.79445e+06	3.64665e+06	4.56938e+06	9.01121e+06	4.47072e+06	4.80821e+06	3.65578e+06	3.89558e+06	4.49636e+06	3.40081e+06	4.08129e+06	4.42656e+06	4.73805e+06	2.50205e+07	5.8147e+06
	TRUE	Cyclobutane	C4 H8	Full match	No results	No results	Full match	No results	-1.94	56.06249	13.444	69253399.82	8	0	0				No matches found	No matches found	No matches found	No matches found	No MS2	[M+NH4]+1	3.19849e+06	3.34802e+06	3.48052e+06	4.64408e+06	3.12713e+06	3.68193e+06	5.98625e+06	2.86945e+07	5.40818e+06	4.7486e+06	4.45799e+06	3.44245e+06	3.44778e+06	2.52777e+06	4.68479e+06	3.16593e+06	5.77891e+06	3.73785e+06	3.6191e+06	6.92534e+07	3.12703e+06	4.69565e+06	4.10097e+06	2.69283e+06	5.35101e+06
	TRUE	Dimethylaminopropyl Methacrylamide	C9 H18 N2 O	Full match	No results	No results	Full match	No results	-1.32	170.14169	12.15	65029149.08	256	0	0				No matches found	No matches found	No matches found	No matches found	DDA for preferred ion	[M+H]+1	1.34061e+06	2.31353e+06	2.55853e+06	2.62784e+06	2.29503e+06	2.54307e+06	3.91619e+06	2.18821e+06	3.05015e+07	1.88711e+06	1.67807e+06	1.82039e+06	2.21998e+06	2.13376e+06	2.513e+06	2.06959e+06	1.99908e+06	2.7381e+06	1.86543e+06	4.07127e+06	2.51622e+06	6.50291e+07	229753	2.60136e+06	2.94837e+06
	TRUE	Dimethylaminopropyl Methacrylamide	C9 H18 N2 O	Full match	No results	No results	Full match	No results	-1.52	170.14165	11.607	62087651.64	256	0	0				No matches found	No matches found	No matches found	No matches found	DDA for preferred ion	[M+H]+1	5.04083e+07	1.93603e+06	2.1113e+06	1.67507e+06	2.55585e+06	2.32153e+06	2.13757e+06	2.72267e+06	2.07087e+06	2.13216e+06	2.18214e+06	1.99936e+06	1.89664e+06	1.60722e+06	2.72527e+06	1.4258e+06	2.51196e+06	2.19804e+06	2.29183e+06	1.69038e+06	1.69552e+06	2.64266e+06	588566	2.0599e+06	2.93981e+06
	TRUE	Dimethylaminopropyl Methacrylamide	C9 H18 N2 O	Full match	No results	No results	Full match	No results	-0.42	170.14184	10.443	70257927.19	256	0	0				No matches found	No matches found	No matches found	No matches found	DDA for preferred ion	[M+H]+1	3.85167e+06	4.00594e+06	4.59868e+06	3.58736e+06	6.5137e+06	3.44595e+06	4.32734e+06	3.96934e+06	7.02579e+07	3.68754e+06	4.6656e+06	4.30732e+06	4.06558e+06	4.25618e+06	4.08403e+06	2.91597e+07	3.8751e+06	4.31259e+06	4.25203e+06	5.10731e+06	3.99498e+06	5.67544e+06	1.69254e+07	3.46408e+06	6.00262e+06
	TRUE	Dimethylaminopropyl Methacrylamide	C9 H18 N2 O	Full match	No results	No results	Full match	No results	-1.61	170.14164	8.742	39080226.77	256	0	0				No matches found	No matches found	No matches found	No matches found	DDA for preferred ion	[M+H]+1	2.58321e+06	2.1747e+06	2.52205e+06	2.14804e+06	7.00519e+06	2.22015e+06	2.38981e+06	705992	3.17527e+06	3.07189e+06	4.03647e+06	8.88045e+06	2.59538e+06	2.62759e+06	3.90802e+07	2.51958e+06	3.33071e+06	3.12039e+06	1.87449e+06	3.58702e+06	3.32494e+06	2.09233e+06	1.88899e+06	2.32667e+06	8.97184e+06
	TRUE	Dimethylaminopropyl Methacrylamide	C9 H18 N2 O	Full match	No results	No results	Full match	No results	-1.72	170.14162	11.471	48130562.26	256	0	0				No matches found	No matches found	No matches found	No matches found	DDA for preferred ion	[M+H]+1	598769	4.14011e+06	3.07181e+06	3.28435e+06	3.92108e+06	1.93406e+06	4.23327e+06	4.81306e+07	7.62025e+06	6.31421e+06	1.05048e+07	2.62488e+06	3.50118e+06	2.93301e+06	5.31562e+06	3.18767e+06	3.57405e+06	5.91084e+06	3.63292e+06	3.72476e+06	3.90637e+06	5.72124e+06	373872	3.01215e+06	3.98676e+06
	TRUE	Dimethylaminopropyl Methacrylamide	C9 H18 N2 O	Full match	No results	No results	Full match	No results	-1.04	170.14174	9.395	66918556.66	256	0	0				No matches found	No matches found	No matches found	No matches found	DDA for preferred ion	[M+H]+1	4.19073e+06	4.19919e+06	3.70808e+06	1.50345e+07	2.94287e+06	3.01812e+06	2.90483e+06	1.00821e+07	3.00601e+06	3.46615e+06	2.95294e+06	2.6938e+06	1.38255e+06	3.21388e+06	3.42356e+06	2.91245e+06	2.69127e+06	3.56561e+06	3.00208e+06	5.60048e+06	2.81246e+06	2.83891e+06	2.77911e+06	3.03174e+06	4.18903e+06
	TRUE	Dimethylaminopropyl Methacrylamide	C9 H18 N2 O	Full match	No results	No results	Full match	No results	-1.05	170.14173	12.089	67906950.3	256	0	0				No matches found	No matches found	No matches found	No matches found	DDA for preferred ion	[M+H]+1	1.52967e+06	1.83849e+06	2.76985e+06	2.62784e+06	3.30933e+06	2.31801e+06	2.31841e+06	223735	5.89511e+06	2.43911e+06	2.14129e+06	2.03403e+06	3.46086e+06	2.68432e+06	2.53361e+06	2.72313e+06	2.41565e+06	3.66594e+06	2.626e+06	6.7907e+07	2.02553e+06	399533	115329	2.5707e+06	2.2721e+06
	TRUE	2,6-Dimethylquinoline	C11 H11 N	Full match	No results	No results	Full match	No results	-1.63	157.08889	7.746	49099408.64	131	0	0				No matches found	No matches found	No matches found	No matches found	DDA for preferred ion	[M+H]+1	2.98561e+06	7.96064e+06	3.49881e+06	1.95423e+06	4.40865e+06	3.20063e+06	1.82782e+06	1.62471e+07	1.16379e+07	2.85849e+06	4.55296e+06	1.95233e+06	1.24357e+07	1.70383e+06	3.6313e+06	1.94213e+06	2.03966e+06	4.90994e+07	1.69659e+06	2.22609e+06	7.83136e+06	1.68309e+06	2.34746e+06	1.41029e+06	1.19092e+07
	TRUE	Dimethylaminopropyl Methacrylamide	C9 H18 N2 O	Full match	No results	No results	Full match	No results	-1.56	170.14165	11.376	48930757.63	256	0	0				No matches found	No matches found	No matches found	No matches found	DDA for preferred ion	[M+H]+1	2.24377e+06	3.56389e+06	2.6352e+06	5.44107e+06	2.4303e+06	221302	1.49008e+06	297096	2.95933e+06	2.57616e+06	1.05048e+07	2.44905e+06	2.49007e+06	1.55069e+06	2.80895e+07	2.02697e+06	2.7805e+06	2.04296e+06	2.32596e+06	2.40773e+06	2.7161e+06	4.86854e+07	413890	1.74559e+06	2.98503e+06
	TRUE	Dimethylaminopropyl Methacrylamide	C9 H18 N2 O	Full match	No results	No results	Full match	No results	-0.57	170.14182	8.302	99421653.28	256	0	0				No matches found	No matches found	No matches found	No matches found	DDA for preferred ion	[M+H]+1	4.71978e+06	5.70023e+06	5.92068e+07	6.00229e+07	9.94217e+07	5.08857e+06	185909	202852	4.03818e+06	4.22982e+06	3.83535e+06	3.83178e+06	3.89871e+06	7.93493e+07	4.21403e+06	4.98191e+06	4.05172e+06	2.9936e+06	3.88172e+06	3.99817e+06	3.17147e+06	1.16591e+07	788215	4.06468e+06	4.43512e+06
	TRUE	Cyclobutane	C4 H8	Full match	No results	No results	Full match	No results	-1.26	56.06253	13.242	63981231.37	8	0	0				No matches found	No matches found	No matches found	No matches found	No MS2	[M+NH4]+1	2.8806e+06	4.45095e+06	5.82338e+06	4.64486e+06	3.75773e+06	3.54241e+06	5.83256e+06	3.87949e+06	2.85406e+07	4.47472e+06	4.57871e+06	3.30547e+06	4.94283e+06	2.68426e+06	4.17737e+07	3.37954e+06	3.76882e+07	3.46962e+06	4.64219e+06	4.32148e+06	1.17425e+07	4.97947e+06	3.49836e+06	3.54423e+06	5.38808e+06
	TRUE	CYCLURON	C11 H22 N2 O	Full match	No results	No results	Full match	No results	-1.83	198.17285	9.174	42548345.6	135	0	0				No matches found	No matches found	No matches found	No matches found	DDA for preferred ion	[M+H]+1	1.8391e+06	1.83715e+06	1.92479e+06	1.49142e+06	1.85528e+06	2.16073e+06	1.73755e+06	53196.2	1.28102e+07	1.90669e+06	1.73348e+06	2.01023e+06	1.59145e+06	1.58307e+06	1.74226e+06	2.76281e+06	1.51327e+06	5.92738e+06	2.13448e+06	3.51419e+06	1.92838e+06	1.44216e+06	1.95029e+06	1.86014e+06	2.31622e+06
	TRUE	Dimethylaminopropyl Methacrylamide	C9 H18 N2 O	Full match	No results	No results	Full match	No results	-0.47	170.14183	8.272	99421653.28	256	0	0				No matches found	No matches found	No matches found	No matches found	DDA for preferred ion	[M+H]+1	6.17122e+06	1.0849e+07	9.33165e+06	6.91777e+06	9.94217e+07	8.14881e+06	5.80643e+06	5.82571e+06	5.84097e+06	4.75134e+06	6.08282e+06	5.94972e+06	5.71982e+06	6.18292e+07	6.25709e+06	7.41534e+06	6.15278e+06	4.68224e+06	6.09767e+06	5.68652e+06	5.01234e+06	6.87618e+07	139799	6.08248e+06	6.47698e+06
	TRUE	Dimethylaminopropyl Methacrylamide	C9 H18 N2 O	Full match	No results	No results	Full match	No results	-0.91	170.14176	13.675	46836989.15	256	0	0				No matches found	No matches found	No matches found	No matches found	DDA for preferred ion	[M+H]+1	2.75869e+06	2.89497e+06	2.30302e+06	2.56874e+06	2.6952e+06	4.6837e+07	3.32097e+06	2.6467e+06	2.46585e+06	2.76981e+06	2.23241e+06	1.9916e+06	2.84484e+07	1.88142e+06	2.91424e+06	2.74598e+06	2.61033e+06	2.91848e+06	3.00413e+06	2.31198e+06	2.3516e+06	2.74376e+06	2.21086e+07	3.26284e+06	3.51861e+06
	TRUE	Dimethylaminopropyl Methacrylamide	C9 H18 N2 O	Full match	No results	No results	Full match	No results	-1.24	170.1417	7.85	77183018.42	256	0	0				No matches found	No matches found	No matches found	No matches found	DDA for preferred ion	[M+H]+1	4.73559e+06	6.6597e+06	5.98468e+06	4.48556e+06	427144	3.53685e+06	1.35994e+07	9.48356e+06	6.61858e+06	5.16115e+06	8.34373e+06	3.6305e+06	4.12234e+06	2.86195e+06	7.25492e+06	4.31935e+06	3.93847e+06	5.55024e+06	172244	3.94427e+06	3.89035e+06	3.83235e+06	4.85683e+06	7.7183e+07	9.66144e+06
	TRUE	TEMPO	C9 H19 N O	Full match	No results	No results	Full match	No results	-1.67	157.1464	11.413	26517513.17	247	0	0				No matches found	No matches found	No matches found	No matches found	DDA for preferred ion	[M+ACN+H]+1	1.02184e+06	1.31006e+06	1.03763e+06	1.84144e+06	885663	2.65175e+07	1.31994e+06	1.83558e+07	1.1555e+07	7.03788e+06	1.32219e+06	969513	1.10719e+06	956533	9.52166e+06	1.07746e+06	1.15289e+06	2.63563e+06	1.13193e+06	1.25248e+06	992619	1.9021e+07	844980	1.00124e+06	1.60043e+06
	TRUE	2,6-Dimethylquinoline	C11 H11 N	Full match	No results	No results	Full match	No results	-1.51	157.08891	7.58	31748347.4	131	0	0				No matches found	No matches found	No matches found	No matches found	DDA for preferred ion	[M+H]+1	1.07983e+07	1.916e+06	2.72805e+07	6.3217e+06	1.69987e+06	5.29389e+06	2.37632e+06	1.6554e+07	2.15616e+06	2.52778e+07	1.84718e+06	2.85683e+06	2.05141e+06	1.82924e+06	2.14918e+07	3.30726e+06	2.07769e+06	2.27971e+06	1.97937e+06	6.48864e+06	3.39812e+06	2.13999e+06	4.24777e+06	1.95514e+06	8.49715e+06
	TRUE	Dimethylaminopropyl Methacrylamide	C9 H18 N2 O	Full match	No results	No results	Full match	No results	-0.77	170.14178	11.437	66153489.29	256	0	0				No matches found	No matches found	No matches found	No matches found	DDA for preferred ion	[M+H]+1	2.63607e+06	2.99959e+06	2.61441e+06	2.55974e+06	2.3275e+06	6.61535e+07	3.32952e+06	236756	3.19575e+07	6.31421e+06	1.05048e+07	2.80505e+06	3.0593e+06	2.52876e+06	3.69288e+06	2.71062e+06	2.91197e+06	2.70399e+06	2.08297e+06	3.28159e+06	2.30534e+06	4.14178e+06	205401	2.50796e+06	3.79275e+06
	TRUE	CYCLURON	C11 H22 N2 O	Full match	No results	No results	Full match	No results	-1.05	198.173	7.664	59513402.58	135	0	0				No matches found	No matches found	No matches found	No matches found	DDA for preferred ion	[M+H]+1	1.98668e+07	1.79519e+07	4.42865e+06	5.06534e+06	246473	2.05695e+06	1.09151e+06	2.14013e+06	2.26665e+06	2.8339e+06	5.95134e+07	1.39655e+06	2.04623e+06	1.27604e+06	6.34352e+06	1.79965e+06	1.52934e+06	1.72188e+06	1.32005e+06	3.75312e+06	2.36107e+07	1.86303e+06	1.06941e+07	1.25157e+06	2.52221e+07
	TRUE	TEMPO	C9 H19 N O	Full match	No results	No results	Full match	No results	-1.14	157.14649	12.676	47618803.52	247	0	0				No matches found	No matches found	No matches found	No matches found	DDA for preferred ion	[M+ACN+H]+1	1.4916e+06	1.46429e+06	1.48518e+06	1.78384e+06	2.72948e+07	1.50477e+07	4.76188e+07	1.53379e+07	1.86233e+06	1.8626e+06	1.54423e+06	1.60603e+06	1.05987e+07	1.59735e+06	1.79185e+06	1.51187e+06	901139	1.8479e+06	1.58436e+06	1.98515e+06	1.32424e+06	1.66696e+06	1.35283e+06	1.69049e+06	1.96642e+06
	TRUE	N,N-Dimethylacetamide	C4 H9 N O	Full match	No results	No results	Full match	No results	-1.99	87.06824	7.575	31188685.5	91	0	0				No matches found	No matches found	No matches found	No matches found	No MS2	[M+H]+1	2.17326e+06	1.46425e+06	1.93074e+07	1.4563e+06	963360	2.82519e+06	1.74309e+06	7.1966e+06	1.33914e+06	2.3129e+07	2.54265e+07	1.44673e+06	1334969	1.09569e+06	2.50842e+07	5.24468e+06	1.16849e+06	1.35942e+06	1.25796e+06	4.06091e+06	1.05639e+06	4.03522e+06	1.64416e+07	1.11977e+06	1.23876e+06
	TRUE	CYCLURON	C11 H22 N2 O	Full match	No results	No results	Full match	No results	-1.31	198.17295	12.149	26112857.92	135	0	0				No matches found	No matches found	No matches found	No matches found	DDA for preferred ion	[M+H]+1	1.25078e+06	1.46696e+06	1.6202e+06	2.37754e+06	1.68802e+06	1.73287e+06	1.20762e+06	1.47425e+06	1.13917e+07	1.35683e+06	1.30134e+06	1.35478e+06	1.67111e+06	1.54162e+06	1.84248e+06	1.47697e+06	1.48388e+06	2.02117e+06	1.48142e+06	3.10228e+06	1.6716e+06	2.61129e+07	1.14432e+06	1.84791e+06	1.83269e+06
	TRUE	Dimethylaminopropyl Methacrylamide	C9 H18 N2 O	Full match	No results	No results	Full match	No results	-1.86	170.1416	7.885	94400542.42	256	0	0				No matches found	No matches found	No matches found	No matches found	DDA for preferred ion	[M+H]+1	4.40833e+06	4.48652e+06	5.61106e+06	3.05584e+06	3.83156e+06	3.4283e+06	2.58025e+07	5.72727e+06	4.10284e+06	3.20805e+06	5.05658e+06	3.48514e+06	2.64965e+06	2.76552e+06	4.83815e+06	2.96738e+06	286880	3.37012e+06	2.04706e+07	205813	2.41711e+06	2.38978e+06	3.14079e+06	9.44005e+07	6.57101e+06
	TRUE	TEMPO	C9 H19 N O	Full match	No results	No results	Full match	No results	-1.35	157.14645	11.613	24884125.28	247	0	0				No matches found	No matches found	No matches found	No matches found	DDA for preferred ion	[M+ACN+H]+1	1.78388e+07	1.33624e+06	1.28976e+06	1.4719e+06	1.5656e+06	1.51227e+06	1.31701e+06	1.69047e+06	1.82635e+06	1.50947e+06	1.48917e+06	973850	1.37485e+06	717774	1.72759e+06	1.35977e+06	1.78336e+06	1.36878e+06	1.35591e+06	1.53565e+06	1.10222e+06	1.60083e+06	1.28134e+06	1.30563e+06	1.74706e+06
	TRUE	CYCLURON	C11 H22 N2 O	Full match	No results	No results	Full match	No results	-0.9	198.17304	8.933	37162931.41	135	0	0				No matches found	No matches found	No matches found	No matches found	DDA for preferred ion	[M+H]+1	2.61552e+06	2.93725e+06	2.57331e+06	2.15362e+06	2.42142e+06	1.29037e+07	2.15788e+06	3.08775e+06	2.49456e+06	1.09392e+07	2.96704e+06	1.56714e+07	1.84297e+06	2.19853e+06	3.56566e+06	1.97942e+06	2.29088e+06	1.97477e+06	1.8144e+06	2.8742e+06	2.73736e+06	2.13209e+06	1.86592e+07	3.11083e+06	3.71629e+07
	TRUE	TEMPO	C9 H19 N O	Full match	No results	No results	Full match	No results	-0.79	157.14654	10.448	27985180.26	247	0	0				No matches found	No matches found	No matches found	No matches found	DDA for preferred ion	[M+ACN+H]+1	1.17428e+06	1.20284e+06	951544	1.08138e+06	1.999e+06	1.38955e+06	1.23911e+06	54532.8	2.79852e+07	2.04982e+06	1.77026e+06	1.59961e+06	1.16427e+06	1.29238e+06	1.5552e+06	1.16004e+07	1.14943e+06	1.34179e+06	1.24205e+06	1.53512e+06	1.17114e+06	1.05247e+07	5.50061e+06	1.42493e+06	2.22541e+06
	TRUE	CYCLURON	C11 H22 N2 O	Full match	No results	No results	Full match	No results	-0.34	198.17315	13.993	21853111.46	135	0	0				No matches found	No matches found	No matches found	No matches found	DDA for preferred ion	[M+H]+1	1.02354e+06	1.02048e+06	1.36026e+06	1.08896e+06	987393	1.2122e+06	1.21421e+06	1.43545e+06	1.36717e+06	1.12728e+06	1.31468e+06	1.48347e+06	1.46109e+06	998779	1.19551e+06	1.17594e+06	1.41466e+06	1.97201e+07	1.13618e+06	1.05354e+06	850512	1.18923e+06	1.03002e+06	1.03686e+06	1.21956e+06
	TRUE	CYCLURON	C11 H22 N2 O	Full match	No results	No results	Full match	No results	-0.64	198.17309	9.756	27611905.04	135	0	0				No matches found	No matches found	No matches found	No matches found	DDA for preferred ion	[M+H]+1	5.54235e+06	2.76119e+07	1.51898e+06	1.56021e+06	2.98123e+06	1.19163e+06	2.45192e+06	2.17159e+06	7.8582e+06	1.24771e+06	8.20481e+06	7.17579e+06	1.76325e+06	1.57563e+06	1.5023e+06	1.94983e+06	1.80288e+07	1.16501e+06	1.22574e+06	1.5295e+06	1.95176e+06	4.78688e+06	1.10948e+06	1.64287e+06	1.82566e+06
	TRUE	Methylcyclohexylamine	C7 H15 N	Full match	No results	No results	Full match	No results	-2.11	113.12021	7.554	23805867.74	113	0	0				No matches found	No matches found	No matches found	No matches found	DDA for preferred ion	[M+ACN+H]+1	212233	29420.6	1.35063e+07	22606.4	36672.9	118586	104771	23442.3	24274.3	1.6209e+07	37871.8	43161.4	25735.6	26709.4	1.23452e+07	35668.9	26036.5	39340.3	24048.9	2.35467e+06	28102.8	39167.9	5.37591e+06	26090.1	25502.1
	TRUE	TEMPO	C9 H19 N O	Full match	No results	No results	Full match	No results	-0.92	157.14652	10.647	22417109.41	247	0	0				No matches found	No matches found	No matches found	No matches found	DDA for preferred ion	[M+ACN+H]+1	998207	838325	129251	1.98884e+06	1.2606e+06	978336	841881	1.66474e+07	1.38519e+06	1.22457e+06	1.21076e+06	1.01062e+06	964460	1.24375e+06	1.19475e+06	1.2058e+06	1.19318e+06	1.22205e+06	990938	1.07216e+06	1.77869e+06	1.1527e+06	1.34478e+06	1.23073e+06	1.5217e+06
	TRUE	Diethylene glycol n-butyl ether	C8 H18 O3	Full match	No results	No results	Full match	Full match	-1.76	162.12531	7.542	104226692.3	82	0	0				No matches found	No matches found	No matches found	Multiple matches found	DDA for preferred ion	[M+Na]+1	1.37825e+06	1.28453e+06	7.81921e+07	1.95914e+06	1.39687e+06	8.05439e+06	7.8475e+06	111583	2.02558e+06	3.44989e+07	4.87255e+06	6.98136e+06	1.94739e+06	1.84062e+06	2.65154e+07	1.5936e+06	1.87704e+06	3.13892e+06	1.28697e+06	2.58931e+07	1.66431e+06	7.05238e+06	3.65855e+06	1.15162e+06	1.25366e+06
	TRUE	β-Piperidylethanol	C7 H15 N O	Full match	No results	No results	Full match	No results	-1.68	129.11515	10.835	982539.3618	328	0	0				No matches found	No matches found	No matches found	No matches found	DDA for other ion	[M+H]+1	43751.1	50678.9	64159.3	569365	72661.6	96156.3	90447.2	73455.1	55526.2	80215.5	42638	70784.4	329591	74641.3	62682.7	57276.2	78168.8	183676	122681	65699.9	61597.8	64005.6	54544.5	62934.4	74660.2
	TRUE	TEMPO	C9 H19 N O	Full match	No results	No results	Full match	No results	-0.79	157.14654	8.261	38235815.5	247	0	0				No matches found	No matches found	No matches found	No matches found	DDA for preferred ion	[M+ACN+H]+1	2.15635e+06	1.96003e+06	1.99698e+07	2.3565e+07	3.82358e+07	3.47161e+06	2.06683e+06	133637	2.11613e+06	2.24773e+06	2.70284e+06	2.47517e+06	1.95956e+06	2.83529e+07	2.30238e+06	2.75854e+06	2.28291e+06	2.13701e+06	2.58176e+06	2.09138e+06	1.83297e+06	2.60009e+07	2.02835e+06	2.24776e+06	2.53133e+06
	TRUE	2,6-Dimethylquinoline	C11 H11 N	Full match	No results	No results	Full match	No results	-1.22	157.08896	7.672	45873983.18	131	0	0				No matches found	No matches found	No matches found	No matches found	No MS2	[M+H]+1	8.27956e+06	1.1483e+07	5.31244e+06	6.32182e+06	2.07282e+06	2.12413e+06	3.0662e+06	2.96499e+06	6.79991e+06	4.02605e+06	3.09279e+07	2.66984e+06	1.24357e+07	2.25573e+06	5.76061e+06	2.64194e+06	2.49743e+06	4.5874e+07	2.51921e+06	3.13979e+06	1.75784e+07	2.6612e+06	3.36893e+06	2.25254e+06	2.13577e+07
	TRUE		C4 H8 O P2 S	Full match	No results	No results	No match	No results	1.95	165.97743	7.785	84354244.32	4	0	0				No matches found	No matches found	No matches found	No matches found	DDA for preferred ion	[M+H]+1	1.08136e+07	9.23025e+06	1.07051e+07	5.80946e+06	9.23079e+06	8.85421e+06	7.68553e+06	8.02732e+06	1.52554e+07	1.11784e+07	9.45503e+06	1.03826e+07	9.09899e+06	1.06691e+07	1.10366e+07	1.06648e+07	1.02694e+07	2.23239e+07	7.74766e+06	1.14507e+07	7.22118e+07	7.98654e+06	1.01051e+07	1.01855e+07	1.27059e+07
	TRUE	CYCLURON	C11 H22 N2 O	Full match	No results	No results	Full match	No results	-1.6	198.1729	7.59	53481179.14	135	0	0				No matches found	No matches found	No matches found	No matches found	DDA for preferred ion	[M+H]+1	4.77587e+06	724813	2.30911e+07	1.07853e+06	675869	831103	1.30279e+06	5.34812e+07	891404	7.78332e+06	973257	998347	940311	738520	8.91417e+06	8.53581e+06	790852	1.00004e+06	834273	1.69434e+06	739644	1.92987e+06	1.40724e+07	843696	888266
	TRUE	2,6-Dimethylquinoline	C11 H11 N	Full match	No results	No results	Full match	No results	-0.68	157.08904	8.275	20238464.33	131	0	0				No matches found	No matches found	No matches found	No matches found	DDA for preferred ion	[M+H]+1	1.25198e+06	1.24167e+06	7.37942e+06	8.84038e+06	1.21363e+07	2.38969e+06	1.4422e+06	1.4288e+06	1.40091e+06	1.53158e+06	1.73783e+06	1.95682e+06	1.41519e+06	9.61806e+06	1.4835e+06	1.82353e+06	1.47995e+06	1.45393e+06	1.34797e+06	1.47344e+06	1.53276e+06	2.02385e+07	1.36142e+06	1.50411e+06	2.08151e+06
	TRUE	CYCLURON	C11 H22 N2 O	Full match	No results	No results	Full match	No results	-0.65	198.17308	13.669	18376182.43	135	0	0				No matches found	No matches found	No matches found	No matches found	DDA for preferred ion	[M+H]+1	1.2641e+06	1.06803e+06	1.23452e+06	1.3585e+06	1.21965e+06	1.83762e+07	1.25058e+06	1.50399e+06	1.23551e+06	1.31705e+06	1.21572e+06	970418	1.17731e+07	967684	1.46365e+06	1.21663e+06	1.41079e+06	1.3072e+06	1.19358e+06	1.17838e+06	1.09806e+06	1.38486e+06	8.2489e+06	1.78972e+06	1.56305e+06
	TRUE	TEMPO	C9 H19 N O	Full match	No results	No results	Full match	No results	-1.03	157.1465	8.94	18659153.23	247	0	0				No matches found	No matches found	No matches found	No matches found	DDA for preferred ion	[M+ACN+H]+1	667681	2.93725e+06	1.60943e+06	1.45886e+06	1.79121e+06	1.29037e+07	1.38343e+06	2.00886e+06	1.63815e+06	1.09392e+07	1.91069e+06	1.56714e+07	1.84297e+06	1.40173e+06	2.31777e+06	1.22104e+06	1.8297e+06	1.52324e+06	1.8144e+06	2.20729e+06	1.82787e+06	1.41442e+06	1.86592e+07	2.03328e+06	5.36002e+06
	TRUE	4-(1-Pyrrolidinyl)piperidine	C9 H18 N2	Full match	No results	No results	Full match	No results	-1.52	154.14676	9.833	12573447.52	152	0	0				No matches found	No matches found	No matches found	No matches found	DDA for preferred ion	[M+H]+1	49630.1	6.61052e+06	41014.7	37677.1	42648.8	32804.2	37167.2	44610.5	28209.3	97791.6	31837	173501	38644.1	38515.1	32489.5	53749.6	60660	511525	33823.5	33103.5	187744	203511	48730.8	738935	48224.9
	TRUE	4-(1-Pyrrolidinyl)piperidine	C9 H18 N2	Full match	No results	No results	Full match	No results	0.03	154.147	13.964	10942032.98	152	0	0				No matches found	No matches found	No matches found	No matches found	DDA for preferred ion	[M+H]+1	41295.5	50332.9	53818.9	56322.7	35428.8	142792	115565	48381.2	155690	56945.2	49863.4	109249	57285.5	38314.3	58231.2	56385.4	96532.5	5.72541e+06	84307	47616.5	40342.4	58043.9	56396.3	142306	100455
	TRUE	Diethylamine	C4 H11 N	Full match	No results	No results	Full match	No results	-1.08	73.08907	8.241	89704620.56	10	0	0				No matches found	No matches found	No matches found	No matches found	No MS2	[M+H]+1	2.09738e+06	2.30002e+06	8.14654e+06	308217	4.88814e+07	8.97046e+07	2.40432e+06	2.30477e+06	2.44776e+06	3.04333e+06	3.20839e+06	4.15946e+06	3.29144e+06	4.24923e+07	2.42073e+06	3.19391e+06	3.82471e+06	2.71625e+06	3.878e+06	2.61684e+06	2.00695e+06	6.76524e+07	2.59569e+06	3.36814e+06	4.57163e+06
	TRUE		C2 H3 N2 O P	Full match	No results	No results	No match	No results	1.49	101.99845	7.814	4739184.077	4	0	0				No matches found	No matches found	No matches found	No matches found	No MS2	[M+H]+1	584284	502543	498615	257600	432787	394644	531230	314583	471971	1.90901e+06	399712	494867	405186	518722	496213	474955	371865	584189	329372	590302	401906	496875	436971	835054	2.95203e+06
	TRUE	2,6-Dimethylquinoline	C11 H11 N	Full match	No results	No results	Full match	No results	-0.8	157.08902	10.462	14197702.61	131	0	0				No matches found	No matches found	No matches found	No matches found	No MS2	[M+H]+1	891315	995291	793012	886926	1.658e+06	904449	1.08281e+06	872390	1.41977e+07	846087	994768	970945	1.0578e+06	1.08005e+06	838649	929064	912979	734784	1.04414e+06	1.13318e+06	641224	1.3392e+06	2.58075e+06	801141	1.25116e+06
	TRUE	β-Piperidylethanol	C7 H15 N O	Full match	No results	No results	Full match	No results	-1	129.11523	8.981	636626.36	328	0	0				No matches found	No matches found	No matches found	No matches found	DDA for other ion	[M+H]+1	135279	63240	56347.5	99258.9	26427.2	33705.5	59017.8	60659	68144.5	77593	57466.1	98832.1	59688.9	63696	64242.7	55913.5	63066.3	77099.8	126964	67319.6	167468	78206.5	37305.9	636626	65826.1
	TRUE	2,6-Dimethylquinoline	C11 H11 N	Full match	No results	No results	Full match	No results	-1.23	157.08896	6.875	17581232.39	131	0	0				No matches found	No matches found	No matches found	No matches found	DDA for preferred ion	[M+H]+1	6.66297e+06	8.25491e+06	516794	550891	831536	245766	813722	5.32136e+06	572101	1.23761e+06	452567	809411	588259	1.34303e+06	339721	3.40641e+06	9.14049e+06	1.07269e+06	1.03448e+06	421286	302533	746977	551862	1.02697e+06	319757
	TRUE	Cyclohexylamine	C6 H13 N	Full match	No results	No results	Full match	Full match	-2.13	99.10459	7.518	34438564.23	91	0	0				No matches found	No matches found	No matches found	Single match found	DDA for preferred ion	[M+H]+1	297951	286940	9.32875e+06	237540	313401	2.71878e+06	244970	282652	406545	726079	492119	1.11202e+06	227542	194234	6.60631e+06	106565	374615	338850	259679	190687	195875	947673	152804	222149	162389
	TRUE	2,6-Dimethylquinoline	C11 H11 N	Full match	No results	No results	Full match	No results	-0.84	157.08902	8.881	12631377.24	131	0	0				No matches found	No matches found	No matches found	No matches found	DDA for preferred ion	[M+H]+1	1.49476e+06	6.36175e+06	1.44564e+06	1.17362e+06	1.68293e+06	5.97265e+06	1.26969e+06	2.48683e+06	1.09091e+06	1.18397e+06	1.44198e+06	1.21521e+06	1.03213e+06	1.25629e+06	2.80764e+06	1.44394e+06	1.24026e+06	1.01381e+06	879089	1.88381e+06	4.60968e+06	1.22623e+06	1.26314e+07	1.65622e+06	541624
	TRUE	Biacetyl	C4 H6 O2	Full match	No results	No results	Full match	Full match	-1.4	86.03666	6.928	14219685.99	71	0	0				No matches found	No matches found	No matches found	Single match found	No MS2	[M+H]+1	2.41777e+06	2.07102e+06	382272	6.94602e+06	1.60973e+06	941843	1.75669e+06	1.42197e+07	3.75525e+06	1.68631e+06	539941	1.91709e+06	1.77989e+06	2.92404e+06	522406	1.5328e+06	1.11941e+07	1.86773e+06	2.07932e+06	483540	3.00177e+06	1.73533e+06	1.37154e+06	1.31914e+06	512016
	TRUE	Diethylamine	C4 H11 N	Full match	No results	No results	Full match	No results	-0.89	73.08908	7.52	171163646.6	10	0	0				No matches found	No matches found	No matches found	No matches found	No MS2	[M+H]+1	5.1485e+06	4.47487e+06	4.2239e+07	5.32655e+06	4.61874e+06	1.91681e+07	8.32544e+06	5.16336e+06	6.47417e+06	72912.9	6.49434e+06	9.40812e+06	5.62586e+06	5.32696e+06	2.72608e+07	4.71678e+06	5.74833e+06	5.82326e+06	5.57524e+06	460608	5.11855e+06	6.83534e+06	1.1224e+06	5.29104e+06	5.24895e+06
	TRUE	Methylcyclohexylamine	C7 H15 N	Full match	No results	No results	Full match	No results	-1.56	113.12027	13.477	790543.0334	113	0	0				No matches found	No matches found	No matches found	No matches found	DDA for other ion	[M+H]+1	39019.4	47517.2	51868.8	58459.2	35258.8	52181.2	53672.2	57990.8	57416.7	56170.6	50331.9	45306.8	51436.8	38305.2	50791.1	54139.9	58916.7	50140.6	54500.6	46743.5	30434.4	53720.7	55556.9	36012.3	53286.6
	TRUE	1-cyclohexene	C6 H10	Full match	No results	No results	Full match	No results	-2.19	82.07807	9.79	9165968.218	66	0	0				No matches found	No matches found	No matches found	No matches found	DDA for other ion	[M+NH4]+1	1.5475e+06	9.07764e+06	622487	744462	589813	589757	649773	952711	1.35951e+06	648847	5.64719e+06	1.9532e+06	868681	687862	668800	3.03241e+06	7.70774e+06	553702	600351	670423	1.05087e+06	1.33125e+06	1.80405e+06	1.97076e+06	840393
	TRUE	Dimethylaminopropyl Methacrylamide	C9 H18 N2 O	Full match	No results	No results	Full match	No results	-0.67	170.1418	9.693	23456971.84	256	0	0				No matches found	No matches found	No matches found	No matches found	DDA for preferred ion	[M+H]+1	229155	1.42456e+06	2.65663e+06	1.73827e+06	3.65229e+06	1.24155e+06	2.1742e+06	2.49315e+06	2.3457e+07	1.17498e+06	308275	1.39915e+07	1.71189e+06	1.54639e+06	1.60032e+06	2.05446e+06	1.75917e+06	1.98247e+06	1.89914e+06	2.51719e+06	6.57119e+06	100802	292513	2.13167e+06	3.27216e+06
	TRUE	CYCLURON	C11 H22 N2 O	Full match	No results	No results	Full match	No results	-0.24	198.17317	15.228	16926478.51	135	0	0				No matches found	No matches found	No matches found	No matches found	DDA for preferred ion	[M+H]+1	1.49559e+06	1.01755e+06	1.18537e+06	1.33269e+06	2.19275e+06	1.35801e+06	1.51642e+06	1.31963e+06	1.05265e+06	1.25331e+06	1.17056e+06	1.26029e+06	1.3507e+06	1.09229e+06	1.28471e+06	1.15146e+06	1.39768e+06	1.12519e+06	1.10156e+06	5.08312e+06	1.06452e+06	1.35457e+06	3.47518e+06	1.29958e+06	1.47803e+06
	TRUE	2,6-Dimethylquinoline	C11 H11 N	Full match	No results	No results	Full match	No results	-1.76	157.08887	7.515	8354145.985	131	0	0				No matches found	No matches found	No matches found	No matches found	No MS2	[M+H]+1	311812	355016	8.35415e+06	547622	420650	1.91715e+06	651684	373343	521800	99659.9	584183	1.19541e+06	564898	573208	59895.4	450940	495200	323066	664776	189052	513768	1.68263e+06	472495	578176	498753
	TRUE	2,6-Dimethylquinoline	C11 H11 N	Full match	No results	No results	Full match	No results	-1.31	157.08894	7.675	30927904.31	131	0	0				No matches found	No matches found	No matches found	No matches found	DDA for preferred ion	[M+H]+1	1.4727e+06	4.36046e+06	1.27226e+06	6.32182e+06	486891	579983	823797	820236	563077	944230	3.09279e+07	580800	1.24357e+07	579088	1.42817e+06	633159	608676	215812	336591	887308	7.8839e+06	329987	640502	569875	5.3635e+06
	TRUE	1-cyclohexene	C6 H10	Full match	No results	No results	Full match	No results	-1.58	82.07812	8.936	11447354.54	66	0	0				No matches found	No matches found	No matches found	No matches found	DDA for other ion	[M+NH4]+1	787227	759125	913185	675571	834291	5.9756e+06	882742	1.12437e+06	732123	3.91843e+06	813306	4.72426e+06	1.09658e+06	842950	953099	786241	713824	610782	1.75428e+06	1.06677e+06	808738	683339	7.74051e+06	773363	1.14474e+07
	TRUE	(4,5-Dihydro-thiazol-2-yl)-hexyl-amine	C9 H18 N2 S	Full match	No results	No results	Full match	No results	-1.42	186.11881	7.586	10100826.32	21	0	0				No matches found	No matches found	No matches found	No matches found	DDA for preferred ion	[M+H]+1	2.33197e+06	287958	6.58612e+06	894558	26365.3	1.46216e+06	413658	8.31408e+06	40236.2	6.54117e+06	169122	604911	66483.8	26743.9	8.70083e+06	1.25625e+06	127083	60923.7	93919.4	3.44421e+06	24582.3	1.3662e+06	2.66585e+06	40977.4	4.25919e+06
	TRUE	2,6-Dimethylquinoline	C11 H11 N	Full match	No results	No results	Full match	No results	-1.12	157.08897	13.436	7952178.886	131	0	0				No matches found	No matches found	No matches found	No matches found	No MS2	[M+H]+1	722609	670550	1.03071e+06	940142	804527	779482	1.2201e+06	6.10969e+06	1.19083e+06	962257	925560	681129	1.11448e+06	723436	985381	1.0078e+06	1.22209e+06	753665	1.15228e+06	833273	731923	971479	824388	743577	1.09446e+06
	TRUE		C H3 F3 O P2	Full match	No results	No results	No match	No results	2.15	149.96144	9.482	257771679.7	2	0	0				No matches found	No matches found	No matches found	No matches found	DDA for preferred ion	[M+H]+1	5.53861e+07	4.86238e+07	4.97489e+07	5.75694e+07	5.22185e+07	5.60219e+07	5.4467e+07	5.29162e+07	5.53378e+07	5.30448e+07	5.03864e+07	5.12298e+07	2.05032e+07	5.85476e+07	5.54386e+07	5.72221e+07	5.65919e+07	5.56497e+07	5.71874e+07	5.10293e+07	2.76248e+07	6.18812e+07	5.29951e+07	5.38849e+07	4.9394e+07
	TRUE	CYCLURON	C11 H22 N2 O	Full match	No results	No results	Full match	No results	-0.53	198.17311	12.576	22174091.32	135	0	0				No matches found	No matches found	No matches found	No matches found	DDA for preferred ion	[M+H]+1	775159	6.12313e+06	732204	950937	1.06257e+06	1.50477e+07	2.03177e+06	1.53379e+07	1.01949e+06	754113	919959	868484	1.05987e+07	1.14375e+06	1.12521e+06	618142	1.26085e+06	821282	849905	939144	772813	774318	874946	757346	936072
	TRUE	CYCLURON	C11 H22 N2 O	Full match	No results	No results	Full match	No results	-0.8	198.17305	8.095	38022210.57	135	0	0				No matches found	No matches found	No matches found	No matches found	DDA for preferred ion	[M+H]+1	1.7571e+06	1.51951e+06	2.07789e+06	1.34641e+06	1.55487e+06	6.11897e+06	1.94751e+06	1.96489e+06	1.73881e+06	1.59277e+06	2.11861e+06	9.27832e+06	1.98475e+06	2.48659e+06	2.11606e+06	3.15463e+07	1.99547e+06	1.63684e+06	2.41993e+06	1.69674e+06	1.57817e+06	1.3144e+06	1.56981e+06	2.00705e+06	2.34327e+06
	TRUE	4-(1-Pyrrolidinyl)piperidine	C9 H18 N2	Full match	No results	No results	Full match	No results	-1.15	154.14682	11.59	12968393.77	152	0	0				No matches found	No matches found	No matches found	No matches found	DDA for preferred ion	[M+H]+1	3.94338e+06	42332.9	35776.1	60244.3	52387.1	39587	52001.9	54906.3	67076.9	57141.5	41616.5	36868.4	43191.8	126995	49625.2	60027.6	51484.1	50934.5	51361	94734.5	70692.6	49013.5	41532.6	49596.9	54306.2
	TRUE	4-(1-Pyrrolidinyl)piperidine	C9 H18 N2	Full match	No results	No results	Full match	No results	-1.29	154.1468	7.597	23805867.74	152	0	0				No matches found	No matches found	No matches found	No matches found	DDA for preferred ion	[M+H]+1	178023	107582	1.35063e+07	73459.2	47605.8	619719	86421.9	1.73317e+07	54514.2	93145.5	7.88935e+06	645475	46787.3	45911	1.23452e+07	1.06638e+06	49064.4	51324	74666.4	2.35467e+06	4.33803e+06	342390	55927.8	47240.7	46061.6
	TRUE	Myristamide	C14 H29 N O	Full match	No results	No results	Full match	No results	-0.68	227.22476	25.258	7329054.209	70	0	0				No matches found	No matches found	No matches found	No matches found	DDA for preferred ion	[M+H]+1	447650	123554	126191	127679	1.31712e+06	124068	110214	1.32842e+06	118171	119734	7.32905e+06	63416	697273	120358	747264	66187.2	46482.8	124475	993091	125243	128371	124149	126031	122780	121309
	TRUE	4-(1-Pyrrolidinyl)piperidine	C9 H18 N2	Full match	No results	No results	Full match	No results	-1.25	154.14681	10.496	6779564.134	152	0	0				No matches found	No matches found	No matches found	No matches found	DDA for preferred ion	[M+H]+1	36081.8	40731.9	55308.9	46811	54386.7	46492.6	45465.8	50127	49338.2	48570.2	55067.4	52505.3	48965.3	50044	65033.1	53888.8	40840.1	47354.5	70281.8	49757.5	34342.8	54134.4	50405.3	47795.6	245643
	TRUE	CYCLURON	C11 H22 N2 O	Full match	No results	No results	Full match	No results	-0.22	198.17317	11.372	26517513.17	135	0	0				No matches found	No matches found	No matches found	No matches found	DDA for preferred ion	[M+H]+1	1.44421e+06	1.31006e+06	1.68586e+06	1.84144e+06	1.55561e+06	2.65175e+07	1.31994e+06	1.83558e+07	1.1555e+07	1.59356e+06	1.58471e+06	1.68588e+06	1.63711e+06	1.2273e+06	9.52166e+06	1.51448e+06	1.71191e+06	1.41692e+06	1.49711e+06	1.67453e+06	1.70304e+06	1.9021e+07	1.12738e+06	1.39875e+06	2.25992e+06
	TRUE	Methylcyclohexylamine	C7 H15 N	Full match	No results	No results	Full match	No results	-1.37	113.12029	7.826	1461465.565	113	0	0				No matches found	No matches found	No matches found	No matches found	DDA for other ion	[M+H]+1	50687.3	75047	53300.4	43446.3	170798	53757	51913.6	66136	43271.7	54342.7	57029.5	52545.8	53319.9	48863.6	54578	54727.4	48028.3	55009.3	42739.4	52875.6	50567.7	50073.1	55095.7	714367	56570.9
	TRUE	1,2-Divinylbenzene	C10 H10	Full match	No results	No results	Full match	Full match	-1.76	130.07802	7.546	27192724.09	81	0	0				No matches found	No matches found	No matches found	Single match found	DDA for preferred ion	[M+H]+1	2.11169e+06	1.31513e+06	2.17312e+07	1.84788e+06	1.10598e+06	2.38406e+06	2.36183e+06	4.73208e+06	1.55882e+06	1.16586e+07	2.71427e+06	2.24462e+06	1.551e+06	1.28056e+06	1.48451e+07	2.33256e+06	1.34863e+06	1.87025e+06	1.36704e+06	5.94677e+06	1.18593e+06	4.39781e+06	2.64514e+06	1.22102e+06	1.03785e+06
	TRUE	Methylcyclohexylamine	C7 H15 N	Full match	No results	No results	Full match	No results	-1.27	113.12031	9.416	1120211.892	113	0	0				No matches found	No matches found	No matches found	No matches found	DDA for preferred ion	[M+H]+1	37677.3	25196.7	35751.9	36432.5	33187.1	36673.3	93256.7	38451.4	37770.3	36071.9	36049.3	33469.7	1.12021e+06	36417.1	34836.2	37866.1	36826.2	36754.9	40375.7	40090.7	37182.6	34166.4	35049.2	34981.2	33267.2
	TRUE	4-Heptyloxyaniline	C13 H21 N O	Full match	No results	No results	Full match	No results	-1.15	207.16208	6.91	9599612.16	257	0	0				No matches found	No matches found	No matches found	No matches found	DDA for other ion	[M+NH4]+1	75438.6	990734	32651.6	1.1321e+06	37638	37692	37014.3	2.7191e+06	28819.4	41032.6	32810.5	35419.9	33488.7	2.74338e+06	33664.6	37483.6	42342.5	38794.8	35342.3	32723.3	481701	40373	29623.1	101441	32039
	TRUE	1-cyclohexene	C6 H10	Full match	No results	No results	Full match	No results	-1.19	82.07815	13.244	7091894.724	66	0	0				No matches found	No matches found	No matches found	No matches found	No MS2	[M+NH4]+1	304289	376264	512398	418047	515766	451930	637630	517445	3.8106e+06	407162	1.26981e+06	458607	487994	417929	465974	419242	7.09189e+06	449493	440738	397728	4.10755e+06	486513	482030	362759	561023
	TRUE	TAA	C9 H15 N	Full match	No results	No results	Full match	No results	-1.12	137.1203	9.779	12573447.52	154	0	0				No matches found	No matches found	No matches found	No matches found	DDA for other ion	[M+NH4]+1	579802	6.61052e+06	37657	36198.3	54165.9	31278.7	33623.8	87498.4	171532	97791.6	31442	1.13007e+06	37454.1	35155.3	31601.6	53749.6	7.94153e+06	30415.6	33551.2	82918.3	187744	783599	30506	54513.9	33860.2
	TRUE		C3 H6 O P2 S	Full match	No results	No results	No match	No results	1.78	151.96173	7.94	87657346.7	3	0	0				No matches found	No matches found	No matches found	No matches found	DDA for preferred ion	[M+H]+1	4.98967e+06	6.63672e+06	4.7823e+06	2.45115e+06	6.50857e+06	5.1094e+06	5.20649e+06	5.88954e+06	5.49456e+06	5.37077e+06	5.35951e+06	4.73684e+06	5.89508e+06	7.22585e+06	6.80769e+06	6.01195e+06	6.06827e+06	5.38938e+06	6.70886e+06	6.12505e+06	5.25797e+06	5.18311e+06	8.76573e+07	4.81458e+06	6.43769e+06
	TRUE	4-(1-Pyrrolidinyl)piperidine	C9 H18 N2	Full match	No results	No results	Full match	No results	-0.99	154.14685	11.41	7242247.689	152	0	0				No matches found	No matches found	No matches found	No matches found	DDA for preferred ion	[M+H]+1	105425	49503.9	42189.4	23864.5	53572.5	2.60561e+06	58039.7	6.35125e+06	7.24225e+06	29207	47066.5	49391	29608.2	33241.3	55386.7	58909.4	51840.2	53730.6	53501.3	57315.9	202333	59370.7	29186.6	117349	67365.4
	TRUE	Myristamide	C14 H29 N O	Full match	No results	No results	Full match	No results	-0.65	227.22477	10.465	5981893.564	70	0	0				No matches found	No matches found	No matches found	No matches found	DDA for preferred ion	[M+H]+1	290196	411794	393113	272686	367725	330014	336060	370648	5.93207e+06	337799	378722	338275	354587	359101	366766	314414	346041	302678	354307	418657	325283	391902	1.24374e+06	361156	534248
	TRUE	Methylcyclohexylamine	C7 H15 N	Full match	No results	No results	Full match	No results	-0.64	113.12038	9.605	1207639.087	113	0	0				No matches found	No matches found	No matches found	No matches found	DDA for other ion	[M+H]+1	35058.4	43540.9	51088.6	48149.3	48052.1	46339.5	26790.2	643589	49445.3	43288.7	44838	101919	53039.4	52369.3	43343.2	46924.6	50148.6	44421	44690.5	52327.8	38163.4	48198.3	44920.2	63990.2	48063.1
	TRUE	N,N-Dimethylacetamide	C4 H9 N O	Full match	No results	No results	Full match	No results	-1.09	87.06832	11.827	15404454.94	91	0	0				No matches found	No matches found	No matches found	No matches found	No MS2	[M+H]+1	1.01668e+06	739362	735628	683504	5.19481e+06	6.2068e+06	742473	1.08847e+06	1.12653e+06	949751	782843	911767	4.94468e+06	728738	796776	951734	1.43084e+06	112465	1.01902e+06	389156	4.41205e+06	1.01686e+06	678926	8.58917e+06	1.30646e+06
	TRUE	CYCLURON	C11 H22 N2 O	Full match	No results	No results	Full match	No results	-0.57	198.1731	7.548	93233071.32	135	0	0				No matches found	No matches found	No matches found	No matches found	DDA for preferred ion	[M+H]+1	689191	3.72104e+06	2.30911e+07	625428	432459	128443	1.70413e+06	125819	523481	57481.1	737912	1.99165e+06	588933	496551	32778.9	483870	535483	1.16421e+06	580813	49943.2	25444.1	3.36595e+06	582150	522303	888266
	TRUE	CYCLURON	C11 H22 N2 O	Full match	No results	No results	Full match	No results	-0.59	198.1731	8.251	38235815.5	135	0	0				No matches found	No matches found	No matches found	No matches found	DDA for preferred ion	[M+H]+1	642877	835478	4.90241e+06	2.83244e+06	3.82358e+07	2.75451e+07	713146	684018	756971	837609	941821	718450	537866	2.98535e+07	731513	967686	734519	476578	642389	701800	1.83297e+06	607425	496972	645187	758409
	TRUE		C2 H15 N8 O3 P	Full match	No results	No results	Invalid mass	No results	-0.85	230.10028	7.809	5097866.598	11	0	0				No matches found	No matches found	No matches found	No matches found	DDA for preferred ion	[M+H]+1	31999.2	33042.6	33458.2	21168.8	40837.8	34445.6	417084	200667	33102.4	34452.4	53041.5	32223.4	33228.9	30085	33786.5	33259	29275.2	436830	63735.8	32522.9	31501.4	30835	32967.5	30453.5	64425.1
	TRUE	1H-1,2,4-Triazole-3-sulfonamide	C H4 N4 O3 Si	Invalid mass	No results	No results	Invalid mass	No results	-3.29	148.00478	14.005	94916415.43	3	0	0				No matches found	No matches found	No matches found	No matches found	DDA for preferred ion	[M+H]+1	9.84293e+06	1.0509e+07	1.16489e+07	1.23183e+07	8.63295e+06	1.05103e+07	1.17276e+07	1.17419e+07	1.29467e+07	1.21427e+07	1.25936e+07	7.46332e+07	1.21971e+07	9.20955e+06	1.06922e+07	1.32097e+07	1.2313e+07	1.99769e+07	1.22777e+07	1.1393e+07	9.09324e+06	1.22155e+07	1.24854e+07	1.0759e+07	1.31746e+07
	TRUE	β-Piperidylethanol	C7 H15 N O	Full match	No results	No results	Full match	No results	-1.3	129.1152	8.83	811580.7597	328	0	0				No matches found	No matches found	No matches found	No matches found	DDA for other ion	[M+H]+1	71826.7	64746.8	65288.7	126806	218996	69718.6	213223	143614	367528	72338.3	72828.8	109287	65237	119415	170063	65702.4	69523.3	77099.8	29562.1	80857.1	133655	65325.3	67999.3	35769.6	177417
	TRUE	Mexiletine	C11 H17 N O	Full match	No results	No results	Full match	No results	-1.24	179.13079	7.592	1141490.428	482	0	0				No matches found	No matches found	No matches found	No matches found	DDA for preferred ion	[M+H]+1	35395.4	241710	496816	98832.9	42362.7	154443	58208.3	28595.7	79629.5	36078	48275.1	70461.3	49369	50048.5	359470	150155	82154.9	45671.4	39739.8	78950.3	39497.7	60116.8	91565.8	49881	368148
	TRUE	Methylcyclohexylamine	C7 H15 N	Full match	No results	No results	Full match	No results	-1.83	113.12024	9.741	1381904.926	113	0	0				No matches found	No matches found	No matches found	No matches found	DDA for other ion	[M+H]+1	58705.3	1.3819e+06	36885	38666	37502.7	33404.4	34516.9	37445.2	284509	35007.5	34242.1	37353.6	38327.5	38109.3	33954	34507.8	624138	32136.8	33888.3	34670.4	38065	33362.3	34046.9	34268.7	35219.8
	TRUE	(4,5-Dihydro-thiazol-2-yl)-hexyl-amine	C9 H18 N2 S	Full match	No results	No results	Full match	No results	-1.1	186.11886	7.686	7041937.22	21	0	0				No matches found	No matches found	No matches found	No matches found	DDA for preferred ion	[M+H]+1	689996	2.0784e+06	503128	526442	201782	61366	187558	620605	473444	329632	6.90924e+06	241575	216356	56685.8	42889.5	67057.7	127083	135844	52923.1	460804	4.37272e+06	35364.9	399344	34957.2	7.04194e+06
	TRUE	4-(1-Pyrrolidinyl)piperidine	C9 H18 N2	Full match	No results	No results	Full match	No results	-1.01	154.14684	12.524	6342800.215	152	0	0				No matches found	No matches found	No matches found	No matches found	DDA for preferred ion	[M+H]+1	46097.1	46427.5	6.3428e+06	46996.9	43681.1	39988.1	482416	3.16614e+06	45146.6	65386.5	69879.8	38758.5	1.52667e+06	31109.1	46966.7	44166.2	44412.4	43324.8	48781	42481	33866.4	41271.8	46643.1	47903.2	44447.7
	TRUE	CYCLURON	C11 H22 N2 O	Full match	No results	No results	Full match	No results	-0.64	198.17309	8.88	21664777.75	135	0	0				No matches found	No matches found	No matches found	No matches found	DDA for preferred ion	[M+H]+1	1.26403e+06	2.93725e+06	1.2233e+06	938933	1.39717e+06	9.99562e+06	971207	2.16648e+07	906732	888456	1.16571e+06	814218	717616	932242	1.7453e+06	1.01398e+06	841139	1.10765e+06	679782	1.56067e+06	1.28285e+06	958809	1.86592e+07	1.39208e+06	1.20507e+06
	TRUE	Methylcyclohexylamine	C7 H15 N	Full match	No results	No results	Full match	No results	-1.94	113.12023	11.446	1006538.297	113	0	0				No matches found	No matches found	No matches found	No matches found	DDA for other ion	[M+H]+1	45360.1	57624.3	35692.1	39095.1	52639.7	703261	64374.8	735949	286244	54779.3	52869.1	39708.3	47544.8	39474.4	1.00654e+06	57751.7	51507.1	47621.3	52946.2	57713.2	56850.1	594053	29575.4	52035.8	58458
	TRUE	Myristamide	C14 H29 N O	Full match	No results	No results	Full match	No results	-0.22	227.22486	13.985	5908517.802	70	0	0				No matches found	No matches found	No matches found	No matches found	DDA for preferred ion	[M+H]+1	247267	272076	1.62451e+06	282312	258320	255538	325990	377026	283140	229430	280455	256511	255311	280003	265867	269111	311670	2.92718e+06	296450	288404	206310	300652	255864	297168	324934
	TRUE	Myristamide	C14 H29 N O	Full match	No results	No results	Full match	No results	-1.34	227.22461	11.406	5807674.233	70	0	0				No matches found	No matches found	No matches found	No matches found	DDA for preferred ion	[M+H]+1	348254	283866	351658	509817	394867	2.23736e+06	402120	3.48229e+06	1.69134e+06	413949	403413	421919	381825	320355	1.96999e+06	322601	487181	340906	376622	378956	377628	3.25399e+06	274100	320643	499139
	TRUE	Myristamide	C14 H29 N O	Full match	No results	No results	Full match	No results	-0.75	227.22474	10.649	6125278.101	70	0	0				No matches found	No matches found	No matches found	No matches found	DDA for preferred ion	[M+H]+1	295982	372780	3.99721e+06	1.53586e+06	304504	296445	343982	4.1958e+06	519698	357826	293441	271605	363870	276897	283671	239786	269738	254867	368486	344421	270436	301614	367887	264299	371193
	TRUE	3,5-Dimethylpyrazole	C5 H8 N2	Full match	No results	No results	Full match	No results	-2.59	96.0685	7.566	9789007.149	52	0	0				No matches found	No matches found	No matches found	No matches found	DDA for other ion	[M+H]+1	953515	667573	7.31969e+06	507834	280947	1.24445e+06	872063	873371	369762	4.33865e+06	541853	1.01874e+06	391512	291910	6.71034e+06	1.7235e+06	348135	533046	345886	1.61046e+06	330985	1.89056e+06	3.79972e+06	275746	199215
	TRUE	Butyldiglycol acetate	C10 H20 O4	Full match	No results	No results	Full match	No results	-0.61	204.13603	15.181	2955243.871	77	0	0				No matches found	No matches found	No matches found	No matches found	DDA for preferred ion	[M+H]+1	208326	133028	201989	132845	124816	192478	234580	100537	59626.3	113205	131300	111140	122486	144327	129792	190261	139316	104100	67264.9	1.20653e+06	154854	132052	143898	120672	129465
	TRUE	(4,5-Dihydro-thiazol-2-yl)-hexyl-amine	C9 H18 N2 S	Full match	No results	No results	Full match	No results	-0.76	186.11893	6.89	19564041.66	21	0	0				No matches found	No matches found	No matches found	No matches found	DDA for preferred ion	[M+H]+1	5.42778e+06	5.02864e+06	51769.6	6.72697e+06	1.0345e+06	222180	360705	120578	80239.8	2.99693e+06	79841.6	850221	686393	1.16142e+06	53346.2	1.01507e+06	6.32914e+06	406354	130578	53202.1	54453.5	366884	221909	399855	62966.5
	TRUE	Cyclohexylamine	C6 H13 N	Full match	No results	No results	Full match	Full match	-1.51	99.10465	7.625	27460449.37	91	0	0				No matches found	No matches found	No matches found	Single match found	DDA for preferred ion	[M+H]+1	8.27754e+06	6.54257e+06	1.72909e+07	2.34719e+06	1.2341e+06	1.58048e+06	1.82049e+06	1.26437e+07	1.82462e+06	726079	2.27083e+07	1.44923e+06	1.60611e+06	1.3414e+06	2.74604e+07	5.4284e+06	1.57146e+06	1.62812e+06	1.32327e+06	1.85581e+06	1.05996e+07	2.48914e+06	2.49987e+06	1.36705e+06	7.67869e+06
	TRUE	CYCLURON	C11 H22 N2 O	Full match	No results	No results	Full match	No results	-0.51	198.17311	11.503	17838753.71	135	0	0				No matches found	No matches found	No matches found	No matches found	DDA for preferred ion	[M+H]+1	1.78388e+07	609046	718917	738274	628994	774885	547566	325028	1.1555e+07	7.03788e+06	701640	524934	835045	717774	854907	677474	823996	2.63563e+06	571751	763438	604093	842759	474230	724896	841486
	TRUE	Butyldiglycol acetate	C10 H20 O4	Full match	No results	No results	Full match	No results	-1.15	204.13592	14.981	6748636.165	77	0	0				No matches found	No matches found	No matches found	No matches found	DDA for preferred ion	[M+Na]+1	48813.8	39541.7	50805.4	48896.5	50953.4	2.09717e+06	51390.6	48993.9	35968.5	51430.2	39507.9	40551.8	47869.4	37504.4	48342.2	50348.8	39506.6	50427.6	51564.9	42561.1	53129.7	6.74864e+06	1.59358e+06	53658.9	49052.3
	TRUE	1,3-Dicyclohexylurea	C13 H24 N2 O	Full match	No results	No results	Full match	Full match	-1.75	224.18847	9.165	4628821.177	69	0	0				No matches found	No matches found	No matches found	Single match found	DDA for preferred ion	[M+H]+1	38823.3	39053.5	35450	36098.2	38138	38647.2	36488.5	34073.8	111030	40980.5	34557.5	39771	68068.7	36209.9	36423.5	45150.9	36053.6	59797.5	42153.9	36733.3	35999.4	35913.4	40150.9	37713	38995.7
	TRUE	tert-butyl octahydropyrrolo[3,4-c]pyrrole-2-carboxylate	C11 H20 N2 O2	Full match	No results	No results	Full match	No results	-1.57	212.15214	7.561	6507439.654	200	0	0				No matches found	No matches found	No matches found	No matches found	DDA for preferred ion	[M+H]+1	180027	55056.5	3.27266e+06	111080	82954.5	766594	200950	6.50744e+06	134601	3.43365e+06	126311	283829	105400	436972	4.12245e+06	477161	92513.7	364026	99603.9	1.49941e+06	37949.4	433141	1.07732e+06	73949.4	114103
	TRUE	Methylcyclohexylamine	C7 H15 N	Full match	No results	No results	Full match	No results	-1.08	113.12033	14.033	583651.2817	113	0	0				No matches found	No matches found	No matches found	No matches found	DDA for other ion	[M+H]+1	44053.7	53414.5	59925.2	58338.6	40493.1	58702.8	60804.3	59225	58945.4	59291.3	51619.1	58945.2	57606.1	39969.6	59419.6	57831.4	58000	583651	60091.2	44675.2	38222.6	58796.6	55034.9	42796.3	60134.7
	TRUE	Dimethylaminopropyl Methacrylamide	C9 H18 N2 O	Full match	No results	No results	Full match	No results	-0.54	170.14182	7.515	221842497.3	256	0	0				No matches found	No matches found	No matches found	No matches found	DDA for preferred ion	[M+H]+1	2.27307e+06	1.97131e+06	4.82047e+07	1.88516e+06	1.37723e+06	2.43853e+07	2.21685e+06	2.17065e+06	2.84281e+06	2.77563e+06	6.2358e+06	8.84353e+06	1.80095e+06	1.65043e+06	2.375e+07	1.33119e+06	2.86978e+06	3.09409e+06	1.81806e+06	87938	1.48628e+06	8.1884e+06	4.63161e+07	62762.3	1.38088e+06
	TRUE	Biacetyl	C4 H6 O2	Full match	No results	No results	Full match	Full match	-1.89	86.03662	15.182	7928036.998	71	0	0				No matches found	No matches found	No matches found	Single match found	No MS2	[M+H]+1	976548	705049	885688	776026	701578	1.01064e+06	1.06003e+06	924738	557374	761343	793752	784711	711798	841749	915918	848999	688089	757033	764188	3.05037e+06	934941	942160	7.57452e+06	845942	838503
	TRUE	1,3-Dicyclohexylurea	C13 H24 N2 O	Full match	No results	No results	Full match	Full match	-1.28	224.18858	7.553	4815482.39	69	0	0				No matches found	No matches found	No matches found	Single match found	DDA for preferred ion	[M+H]+1	792573	32710.3	2.117e+06	29665.8	34786.8	42005.3	54853.1	427450	32561.5	35641	37373.1	363768	33772.2	35050.1	3.98135e+06	288406	34167.1	39239.2	31558.8	965504	31993.5	100259	299367	34237.4	1.95042e+06
	TRUE	Myristamide	C14 H29 N O	Full match	No results	No results	Full match	No results	-1.42	227.22459	8.773	5960719.959	70	0	0				No matches found	No matches found	No matches found	No matches found	DDA for preferred ion	[M+H]+1	196777	228059	200290	203627	652485	505930	263362	1.01856e+06	312384	251002	367446	282006	340965	259533	5.96072e+06	231547	248628	243100	253221	364840	313325	220930	193935	2.31392e+06	417099
	TRUE		C H3 F O2 S2	Full match	No results	No results	No match	No results	-2.97	129.95546	0.589	85833395.61	1	0	0				No matches found	No matches found	No matches found	No matches found	No MS2	[M+H]+1	1.78498e+07	1.56119e+07	1.29621e+07	9.33708e+06	1.34949e+07	4.86818e+06	2.8334e+07	3.19272e+07	5.60467e+06	3.66815e+07	1.02466e+07	9.89985e+06	8.96549e+06	1.15904e+07	2.25281e+07	1.71545e+07	5.05917e+06	8.44879e+06	4.97886e+07	8.55117e+06	5.74838e+06	6.73096e+06	1.52781e+07	5.00165e+07	3.26236e+07
	TRUE	Dimethylaminopropyl Methacrylamide	C9 H18 N2 O	Full match	No results	No results	Full match	No results	-0.66	170.1418	8.225	41520601.74	256	0	0				No matches found	No matches found	No matches found	No matches found	DDA for preferred ion	[M+H]+1	1.33214e+06	1.38166e+06	3.24213e+06	6.91777e+06	4.15206e+07	4.54594e+06	1.52326e+06	2.7152e+06	1.59864e+06	1.80366e+06	2.08856e+06	2.67522e+06	2.167e+06	1.67882e+06	2.6879e+06	2.19535e+06	2.61205e+06	1.8317e+06	2.65142e+06	1.70934e+06	1610506	1.45093e+06	1.6387e+06	2.61322e+06	2.82709e+06
	TRUE	Butyldiglycol acetate	C10 H20 O4	Full match	No results	No results	Full match	No results	-0.61	204.13603	14.717	3393024.653	77	0	0				No matches found	No matches found	No matches found	No matches found	DDA for preferred ion	[M+H]+1	3.39302e+06	278566	293659	206807	358862	316202	480196	122658	241303	407837	237115	331417	294322	1.25622e+06	389824	317390	280823	297401	263813	239453	340959	315352	472715	262884	356350
	TRUE		C2 H2 P2 S	Full match	No results	No results	Invalid mass	No results	2.6	119.93556	7.691	2451805.907	2	0	0				No matches found	No matches found	No matches found	No matches found	DDA for other ion	[M+H]+1	360223	84274.4	68049.3	66943.5	88268	36269.3	74535.6	2.45181e+06	641847	61783.2	552467	55276.9	51372.2	91671.1	329523	58538.6	66488.7	95351.3	57988.8	77607	108900	60623.8	214725	61343.1	113328
	TRUE	Butyldiglycol acetate	C10 H20 O4	Full match	No results	No results	Full match	No results	-1.38	204.13588	13.839	1926720.971	77	0	0				No matches found	No matches found	No matches found	No matches found	DDA for preferred ion	[M+H]+1	52601.8	106009	49665.3	69820.2	69419.5	222608	94887.4	111794	120296	106433	83662.8	1.92672e+06	186133	78879.6	127886	87166.6	101138	136159	88958.6	60067	77225.8	74429.2	118336	108274	147095
	TRUE		C2 H3 F P2 Si	Full match	No results	No results	No match	No results	1.77	135.94657	7.943	26992553.87	1	0	0				No matches found	No matches found	No matches found	No matches found	No MS2	[M+H]+1	2.26664e+06	2.96246e+06	2.02903e+06	998696	2.92789e+06	2.33646e+06	2.08856e+06	2.48055e+06	2.77463e+06	2.61176e+06	2.56621e+06	2.22089e+06	2.76829e+06	2.94055e+06	2.9534e+06	2.5272e+06	2.90926e+06	2.71759e+06	3.51547e+06	2.53887e+06	2.43919e+06	2.30587e+06	3.11019e+06	2.28291e+06	2.85196e+06
	TRUE		C H3 F O2 S2	Invalid mass	No results	No results	No match	No results	-3.1	129.95545	0.342	33041470.13	1	0	0				No matches found	No matches found	No matches found	No matches found	DDA for preferred ion	[M+H]+1	1.48224e+07	9.57592e+06	9.90737e+06	7.63001e+06	9.06146e+06	3.30415e+07	5.88325e+06	5.98648e+06	1.52184e+07	6.72789e+06	1.5648e+07	5.11197e+06	1.15214e+07	1.12702e+07	8.89746e+06	1.2262e+07	1.08867e+07	2.53591e+07	6.86104e+06	1.59639e+07	7.3314e+06	8.06996e+06	2.03122e+07	6.30291e+06	6.46203e+06
	TRUE	Myristamide	C14 H29 N O	Full match	No results	No results	Full match	No results	-0.99	227.22469	13.438	4991771.152	70	0	0				No matches found	No matches found	No matches found	No matches found	DDA for preferred ion	[M+H]+1	242380	235487	231930	165388	213139	231790	320234	3.3798e+06	269455	219298	223318	291427	260837	262354	206750	208987	246101	263850	238070	254370	211373	233074	249606	241290	257587
	TRUE	Mexiletine	C11 H17 N O	Full match	No results	No results	Full match	No results	-0.91	179.13085	7.505	1008003.693	482	0	0				No matches found	No matches found	No matches found	No matches found	DDA for other ion	[M+H]+1	33802	50596.8	262407	99282.4	54530.7	61428.8	58208.3	51703.4	54185.1	44984	85275.5	51212	51402.5	50861.7	134144	43333.3	37926.1	58942.6	291530	52514.2	51095.2	43190.1	91565.8	52826	50954
	TRUE	4-(1-Pyrrolidinyl)piperidine	C9 H18 N2	Full match	No results	No results	Full match	No results	-0.76	154.14688	13.387	12201329.26	152	0	0				No matches found	No matches found	No matches found	No matches found	DDA for preferred ion	[M+H]+1	43822.6	50928.7	109658	52516.7	33689.2	106919	55941.3	2.84022e+06	59444.8	55501	50571.5	46570.4	48138.4	46204	58642.3	53154.1	65721.6	53938.6	55693.4	41464.9	44871.2	51022	56148.9	36944.6	54479.5
	TRUE	(4,5-Dihydro-thiazol-2-yl)-hexyl-amine	C9 H18 N2 S	Full match	No results	No results	Full match	No results	-1.39	186.11881	7.517	10127966.26	21	0	0				No matches found	No matches found	No matches found	No matches found	DDA for preferred ion	[M+H]+1	47960.9	46455.3	3.03551e+06	43259.4	94505.5	1.54079e+06	257920	2452.7	59513.5	44716.7	383151	595330	453833	48910.7	66916.6	70910.9	503779	208128	46817.5	134415	94663.3	504075	84256.6	50509	46457.2
	TRUE		C5 H2 I O P Si	Full match	No results	No results	No match	No results	-0.99	263.86546	1.268	98875965.2	1	0	0				No matches found	No matches found	No matches found	No matches found	DDA for preferred ion	[M+H]+1	9.36273e+06	4.77185e+06	1.38843e+07	4.51068e+06	7.33929e+07	9.8876e+07	6.90914e+06	7.96663e+06	1.5169e+07	8.43566e+06	9.42291e+06	7.69455e+06	6.21611e+06	7.18478e+06	5.24232e+07	5.88157e+06	8.07095e+07	7.12892e+06	2.03884e+07	8.85024e+06	5.74015e+06	9.00684e+06	8.32192e+06	2.44239e+07	8.14256e+06
	TRUE	tert-Butyl hydroperoxide	C4 H10 O2	Full match	No results	No results	Full match	No results	-0.46	90.06804	6.93	839043.1001	34	0	0				No matches found	No matches found	No matches found	No matches found	No MS2	[M+H]+1	100594	88654.2	86852.8	311196	92567.2	92700.2	92559.3	90837.6	84301.8	100916	82305.3	91515	50003.9	109325	82795.1	87932.5	526977	97296.6	95159.5	80238.7	161237	92642.2	171195	101379	82392.3
	TRUE		C3 H4 P2 Si	Full match	No results	No results	No match	No results	-2.16	129.95547	2.075	81237988.43	1	0	0				No matches found	No matches found	No matches found	No matches found	DDA for preferred ion	[M+H]+1	8.19772e+06	4.32142e+06	8.6603e+06	7.78201e+06	2.00528e+07	9.05928e+06	8.39576e+06	6.56898e+06	1.0676e+07	9.33387e+06	1.29267e+07	1.13028e+07	2.25097e+07	6.22946e+06	4.51953e+06	6.44707e+06	3.44217e+06	5.76024e+06	1.73538e+07	5.34446e+06	3.03462e+06	7.06641e+06	2.52105e+07	6.61814e+06	4.54096e+06
	TRUE	4-Heptyloxyaniline	C13 H21 N O	Full match	No results	No results	Full match	No results	-1.75	207.16195	7.559	4815482.39	257	0	0				No matches found	No matches found	No matches found	No matches found	DDA for other ion	[M+NH4]+1	17011.3	17223.8	2.117e+06	16034.3	18085.8	22703.8	54853.1	2.88599e+06	19038.8	2.81517e+06	21828.3	363768	18253.9	18944.5	181609	288406	18173.6	21208.8	16070.9	965504	17143.9	203161	17600.9	18505.3	18088.2
	TRUE	Cyclohexylamine	C6 H13 N	Full match	No results	No results	Full match	Full match	-0.94	99.10471	11.437	9551442.601	91	0	0				No matches found	No matches found	No matches found	Single match found	DDA for preferred ion	[M+H]+1	532510	737189	354827	904202	541812	9.55144e+06	600874	89467	3.45674e+06	599612	551741	381858	459907	356203	96919.5	593360	438066	1.04415e+06	545822	474494	2.71101e+06	8.15941e+06	310876	655152	822426
	TRUE	4-(1-Pyrrolidinyl)piperidine	C9 H18 N2	Full match	No results	No results	Full match	No results	-0.48	154.14692	12.153	6026336.46	152	0	0				No matches found	No matches found	No matches found	No matches found	DDA for preferred ion	[M+H]+1	21938.3	37721	30640.1	37802.1	36834.8	38107.8	157777	29843.9	2.97536e+06	38243.3	36014.8	45650.5	38137.7	37219	36426	39609.2	37380.7	36705.5	78047.5	39306.9	36356.3	6.02634e+06	25068	40301.2	40530.7
	TRUE	4-(1-Pyrrolidinyl)piperidine	C9 H18 N2	Full match	No results	No results	Full match	No results	-0.55	154.14691	15.157	4130864.704	152	0	0				No matches found	No matches found	No matches found	No matches found	DDA for preferred ion	[M+H]+1	153558	54244.1	74205.6	83335.5	69852.6	80331.7	77941.5	75731	351271	77262.5	56318.2	43632.9	76322.3	54158.7	73187.4	72852.6	64670.2	75296.6	90827.9	61632.9	73417.2	80079.2	79063.7	73948.2	75018.6
	TRUE	Isovaleraldehyde	C5 H10 O	Full match	No results	No results	Full match	No results	-0.58	86.07311	19.191	322178969.9	97	0	0				No matches found	No matches found	No matches found	No matches found	No MS2	[M+H]+1	3.28845e+07	2.74025e+07	3.09933e+07	3.22179e+08	2.70681e+07	2.7995e+07	3.30255e+07	3.04047e+07	3.03606e+07	3.01036e+07	4.18278e+07	3.47698e+07	2.76085e+07	26522009	2.99905e+07	2.44902e+07	3.34543e+07	2.72097e+07	1.3868e+07	3.25565e+07	3.16807e+07	3.34536e+07	1.44172e+07	2.61035e+07	3.6099e+07
	TRUE		C3 H4 P2 Si	Full match	No results	No results	No match	No results	-2.39	129.95544	2.181	81237988.43	1	0	0				No matches found	No matches found	No matches found	No matches found	DDA for preferred ion	[M+H]+1	1.04518e+07	4.33132e+06	1.02551e+07	6.97941e+06	2.00528e+07	1.11878e+07	7.52025e+06	8.62517e+06	1.32384e+07	9.33387e+06	8.37213e+06	8.53866e+06	2.25097e+07	1.14273e+07	5.62131e+06	2.44866e+06	5.8676e+06	5.03293e+07	1.73538e+07	5.35501e+06	2.83118e+07	2.35049e+07	2.52105e+07	8.10948e+06	9.72495e+06
	TRUE	Mexiletine	C11 H17 N O	Full match	No results	No results	Full match	No results	-0.81	179.13087	7.649	1141490.428	482	0	0				No matches found	No matches found	No matches found	No matches found	DDA for other ion	[M+H]+1	165580	241710	57671.8	99874.9	46511.4	61240.2	87567.4	483061	61115.4	79292.5	579128	51560.1	45896.2	123929	52388.5	52287.8	77051.5	26541	114671	48914.7	84497.2	51572	82145.4	47880.3	361203
	TRUE	Butyldiglycol acetate	C10 H20 O4	Full match	No results	No results	Full match	No results	-0.72	204.13601	25.526	927740.7573	77	0	0				No matches found	No matches found	No matches found	No matches found	DDA for preferred ion	[M+H]+1	63208.9	137412	203189	50522.2	90454.4	356848	98351.3	126540	157537	475379	338082	419088	71883.5	166833	236262	51834.2	49486	171850	114345	50421.1	208303	49724.1	94451.3	50281.9	58350.1
	TRUE	Urea	C H4 N2 O	Full match	No results	No results	Full match	No results	-1.4	60.03228	3.013	142799138.2	14	0	0				No matches found	No matches found	No matches found	No matches found	No MS2	[M+H]+1	1.95309e+07	1.04551e+07	1.89136e+07	7.36661e+06	8.93249e+07	2.04477e+07	2.09941e+07	7.99487e+07	2.12426e+07	1.28744e+07	5.2225e+07	2.15391e+07	2.12001e+07	2.10837e+07	7.78132e+06	2.20872e+07	2.5897e+07	1.99467e+07	1.99853e+07	2.001e+07	2.26213e+07	1.82451e+07	1.42799e+08	9.8465e+07	1.08052e+07
	TRUE	Urea	C H4 N2 O	Full match	No results	No results	Full match	No results	-1.22	60.03229	2.027	164694425.8	14	0	0				No matches found	No matches found	No matches found	No matches found	No MS2	[M+H]+1	1.64694e+08	4.11693e+07	3.39722e+07	2.09818e+07	2.79589e+07	5.40931e+07	3.08645e+07	3.84034e+07	1.18981e+08	4.1915e+07	6.3487e+07	3.0116e+07	4.37551e+07	9.5649e+06	4.13992e+07	2.41896e+07	3.80697e+07	2.85889e+07	1.14325e+07	7.04673e+06	3.54282e+07	3.87271e+07	4.21616e+07	9.4581e+07	4.49156e+07
	TRUE	1,3-Dicyclohexylurea	C13 H24 N2 O	Full match	No results	No results	Full match	Full match	-1.38	224.18855	14.436	2966811.327	69	0	0				No matches found	No matches found	No matches found	Single match found	No MS2	[M+H]+1	47358.9	50681.9	63250	59273.4	46885.5	58398.6	60602	60916.4	108922	60599.7	47485.6	2.96681e+06	58385.4	41756.8	567890	59674.4	49589.3	55906.7	60892.8	47464.5	41649.1	65706.1	57636	55717.2	59204.6
	TRUE	CYCLURON	C11 H22 N2 O	Full match	No results	No results	Full match	No results	-0.49	198.17312	8.405	29853515.26	135	0	0				No matches found	No matches found	No matches found	No matches found	DDA for preferred ion	[M+H]+1	2.90291e+06	1.92686e+06	3.01648e+06	2.56212e+06	2.48895e+06	2.297e+06	1.40192e+07	1.57753e+06	1.89297e+06	1.73421e+06	2.08276e+06	1.52498e+06	1.47054e+06	2.98535e+07	1.81157e+06	1.87485e+06	1.75737e+06	1.09522e+06	1.54432e+06	1.56615e+06	1.83297e+06	2.32071e+06	1.47049e+06	1.61679e+06	1.40873e+06
	TRUE	4-(1-Pyrrolidinyl)piperidine	C9 H18 N2	Full match	No results	No results	Full match	No results	-1.35	154.14679	9.091	21670015.24	152	0	0				No matches found	No matches found	No matches found	No matches found	DDA for preferred ion	[M+H]+1	64052.6	44593.7	40427.2	39718.4	45617.2	46273.2	63750.5	44360.3	1.63444e+06	46389.8	40416.7	3.25355e+06	46201.4	83438.1	45558.4	42616.3	40468.7	1.15414e+06	3.44662e+06	40478.7	40600	48744.2	54163.7	63759	79498.4
	TRUE	3-Morpholinopropylamine	C7 H16 N2 O	Full match	No results	No results	Full match	No results	-1.84	144.126	7.565	1031144.501	133	0	0				No matches found	No matches found	No matches found	No matches found	DDA for other ion	[M+H]+1	292862	147077	922200	29720.6	32345.5	40604.4	69527.1	39143.1	34994.7	461805	197056	36716	32646	32829	307774	30503.5	32706.4	37930.7	30275.9	166934	31422.3	258004	465157	33095.6	31782.9
	TRUE	β-Piperidylethanol	C7 H15 N O	Full match	No results	No results	Full match	No results	-0.94	129.11524	8.76	811580.7597	328	0	0				No matches found	No matches found	No matches found	No matches found	DDA for other ion	[M+H]+1	44190.2	59582.1	56737.8	56451.9	69357.2	99627.8	213223	39584.6	367528	63836.9	65158.5	263148	56950.6	56480.6	170063	58793.9	63319.6	59300.8	75797.5	66497.5	133655	265200	159841	51726.3	58156.6
	TRUE	Methylcyclohexylamine	C7 H15 N	Full match	No results	No results	Full match	No results	-1.54	113.12028	8.984	931419.325	113	0	0				No matches found	No matches found	No matches found	No matches found	DDA for other ion	[M+H]+1	30141.9	30526.5	27414.1	29791.6	32181.3	26520.1	29741.1	30356.8	28450.4	415685	28959.2	427579	30079.3	28043.3	31607	28176.8	31344.7	27631.1	146780	29946.7	31634.3	26959.3	31169.1	31592	931419
	TRUE	Urea	C H4 N2 O	Full match	No results	No results	Full match	No results	-1.21	60.03229	1.868	74175442.04	14	0	0				No matches found	No matches found	No matches found	No matches found	No MS2	[M+H]+1	1.21164e+07	1.18207e+07	50052310	4.99083e+06	1.36788e+07	9.79557e+06	6.79386e+06	1.31626e+07	1.13871e+07	1.04147e+07	1.38769e+07	7.35785e+06	1.15413e+07	4.53156e+06	7.5576e+06	1.21515e+07	1.31716e+07	1.09932e+07	6.958e+07	1.18323e+07	1.29308e+07	9.97455e+06	7.41754e+07	8.12725e+06	1.23549e+07
	TRUE	Urea	C H4 N2 O	Full match	No results	No results	Full match	No results	-1.42	60.03228	2.865	305657722.6	14	0	0				No matches found	No matches found	No matches found	No matches found	No MS2	[M+H]+1	8.2888e+06	3.01065e+07	8.72151e+06	1.023e+07	1.7209e+07	4.77086e+07	8.21906e+07	3.40352e+07	7.85333e+06	2.1794e+07	8.76524e+06	1.18294e+07	1.56308e+07	4.06747e+07	1.33661e+07	1.2667e+07	1.20792e+07	1.2116e+07	3.05658e+08	1.23431e+07	1.53978e+07	4.07697e+07	1.38033e+07	1.55563e+07	5.85953e+07
	TRUE	Urea	C H4 N2 O	Full match	No results	No results	Full match	No results	-1.15	60.03229	0.599	194154658.8	14	0	0				No matches found	No matches found	No matches found	No matches found	No MS2	[M+H]+1	6.62488e+07	8.22186e+07	2.55213e+07	5.6723e+06	7.50649e+07	2.59723e+07	2.86279e+07	2.87017e+07	1.94155e+08	2.92781e+07	2.94187e+07	3.22725e+07	3.05672e+07	1.3082e+07	5.39624e+07	5.93572e+07	2.84945e+07	2.65061e+07	2.93855e+07	2.55964e+07	8.42566e+07	2.6842e+07	3.28797e+07	1.90474e+08	3.13139e+07
	TRUE		C2 H3 F P2 Si	Full match	No results	No results	No match	No results	2.25	135.94663	9.349	265415712.8	1	0	0				No matches found	No matches found	No matches found	No matches found	DDA for preferred ion	[M+H]+1	7.59388e+07	5.65859e+07	3.83715e+07	4.07087e+07	4.13934e+07	3.99898e+07	3.79069e+07	3.89875e+07	3.82377e+07	4.04739e+07	3.93609e+07	3.5661e+07	9.70908e+06	4.05923e+07	4.06917e+07	4.09832e+07	4.1774e+07	4.02821e+07	3.64924e+07	2.65416e+08	3.90245e+07	3.94034e+07	4.05618e+07	4.03663e+07	3.92204e+07
	TRUE	1,3-Dicyclohexylurea	C13 H24 N2 O	Full match	No results	No results	Full match	Full match	-0.25	224.18881	13.978	3229083.418	69	0	0				No matches found	No matches found	No matches found	Single match found	DDA for preferred ion	[M+H]+1	34606.3	43050.6	48242.9	46989.7	33976.9	47195.9	49862.6	48563.2	47693	49424.1	42574.7	60867.8	46055.8	31854.8	50156	46423.5	50128.1	1.07493e+06	49963.6	36520.2	30272.2	49879.2	47744.8	37277.6	47872
	TRUE	Urea	C H4 N2 O	Full match	No results	No results	Full match	No results	-1.41	60.03228	3.123	89058768.31	14	0	0				No matches found	No matches found	No matches found	No matches found	No MS2	[M+H]+1	1.33263e+07	8.14745e+06	1.39383e+07	1.21626e+07	1.59021e+07	7.69598e+06	1.36427e+07	1.70603e+07	1.50337e+07	2.7226e+07	1.37233e+07	1.3976e+07	1.60276e+07	1.0644e+07	9.51085e+06	1.43209e+07	4.10755e+07	8.90588e+07	1.63437e+07	1.33769e+07	3.13277e+07	1.4826e+07	8.22675e+07	3.63245e+07	1.39288e+07
	TRUE	Diethylamine	C4 H11 N	Full match	No results	No results	Full match	No results	-0.52	73.08911	7.528	171163646.6	10	0	0				No matches found	No matches found	No matches found	No matches found	No MS2	[M+H]+1	4.51482e+06	3.89847e+06	98514.1	3.41773e+06	4.26296e+06	1.91681e+07	6.98919e+06	4.46363e+06	5.76945e+06	713837	7.18245e+06	9.40816e+06	5.05625e+06	4.78214e+06	19698.1	4.27567e+06	5.09664e+06	3.77514e+06	3.82865e+06	1.87621e+07	4.52938e+06	1.05956e+07	784209	3.56481e+06	4.72002e+06
	TRUE	CYCLURON	C11 H22 N2 O	Full match	No results	No results	Full match	No results	-0.57	198.1731	10.472	27985180.26	135	0	0				No matches found	No matches found	No matches found	No matches found	DDA for preferred ion	[M+H]+1	1.0371e+06	1.11034e+06	1.16233e+06	1.11428e+06	1.89475e+06	1.01318e+06	1.1297e+06	1.03159e+06	2.79852e+07	2.04982e+06	1.68638e+06	1.1682e+06	1.09448e+06	1.18482e+06	1.13612e+06	1.11606e+06	1.02304e+06	1.88459e+06	1.08855e+06	1.07216e+06	1.06062e+06	1.40639e+06	5.50061e+06	1.00989e+06	1.59478e+06
	TRUE	Butyldiglycol acetate	C10 H20 O4	Full match	No results	No results	Full match	No results	-0.6	204.13604	12.674	4135726.374	77	0	0				No matches found	No matches found	No matches found	No matches found	DDA for preferred ion	[M+H]+1	220149	242897	328842	223600	1.24622e+06	1.94783e+06	4.13573e+06	331596	158160	261866	180541	420273	1.47255e+06	190313	245262	174432	316043	196063	898047	155990	195596	138107	384779	183551	193510
	TRUE		C3 H4 P2 Si	Full match	No results	No results	No match	No results	-2.52	129.95542	1.633	39718289.2	1	0	0				No matches found	No matches found	No matches found	No matches found	DDA for preferred ion	[M+H]+1	1.25661e+07	8.06351e+06	7.54943e+06	3.97183e+07	1.25801e+07	12479967	9.68257e+06	6.48086e+06	5.11894e+06	4.78837e+06	8.67925e+06	6.00999e+06	4.89331e+06	7.80008e+06	7.84237e+06	2.60102e+07	7.40637e+06	8.48313e+06	1.67455e+07	4.61876e+06	1.15556e+07	4.09577e+06	1.22842e+07	1.2403e+07	3.31275e+06
	TRUE	(4,5-Dihydro-thiazol-2-yl)-hexyl-amine	C9 H18 N2 S	Full match	No results	No results	Full match	No results	-0.72	186.11894	6.962	8622114.708	21	0	0				No matches found	No matches found	No matches found	No matches found	DDA for preferred ion	[M+H]+1	241010	1.41893e+06	40350.5	60294.5	79194.4	63946.4	27614.3	120578	2.12234e+06	126687	77438.8	711605	214461	160226	40587.6	72882.7	631320	122658	67445.4	42327	1.49694e+06	44730.8	63126.4	123525	40215.1
	TRUE	tert-butyl octahydropyrrolo[3,4-c]pyrrole-2-carboxylate	C11 H20 N2 O2	Full match	No results	No results	Full match	No results	-0.99	212.15227	12.679	3324715.935	200	0	0				No matches found	No matches found	No matches found	No matches found	DDA for preferred ion	[M+H]+1	79057.2	508855	142035	104319	1.59835e+06	841465	3.32472e+06	920743	126122	136948	128768	168822	643118	108935	129496	156950	226786	145878	149853	96130.1	118126	25606	300332	114881	166167
	TRUE	Tetralin	C10 H12	Full match	No results	No results	Full match	No results	-1.08	132.09376	10.769	4930179.937	114	0	0				No matches found	No matches found	No matches found	No matches found	DDA for preferred ion	[M+H]+1	321721	337308	440357	346249	359464	427020	416749	390859	378123	386081	303253	409131	285184	330270	348140	397370	398409	396331	362412	366849	4.93018e+06	387092	303479	328637	431512
	TRUE		C H6 F N4 P	Full match	No results	No results	No match	No results	-0.04	124.03141	7.685	3291708.503	2	0	0				No matches found	No matches found	No matches found	No matches found	DDA for preferred ion	[M+H]+1	479587	324093	121136	707155	116864	69681.5	149742	168101	300301	113569	3.29171e+06	125093	125215	141087	109783	130461	107009	504060	136912	155249	354027	144224	105830	142884	834315
	TRUE	Urea	C H4 N2 O	Full match	No results	No results	Full match	No results	-1.34	60.03228	3.369	83657746.88	14	0	0				No matches found	No matches found	No matches found	No matches found	No MS2	[M+H]+1	4.38552e+07	1.31669e+07	1.70636e+07	2.35161e+07	3.46456e+07	1.14297e+07	1.30586e+07	7.78264e+06	1.36449e+07	5.6533e+07	9.5919e+06	1.02531e+07	6.73574e+07	1.17383e+07	1.15171e+07	1.3257e+07	1.40497e+07	1.19501e+07	1.54241e+07	1.10358e+07	1.33718e+07	3.30953e+07	1.26892e+07	6.21406e+07	1.5833e+07
	TRUE	4-(1-Pyrrolidinyl)piperidine	C9 H18 N2	Full match	No results	No results	Full match	No results	-1.49	154.14677	7.649	16209030.71	152	0	0				No matches found	No matches found	No matches found	No matches found	DDA for preferred ion	[M+H]+1	212233	24342.2	1.35063e+07	22495.7	19953.3	24095.9	21482.9	22045.4	19186.4	1.6209e+07	7.88935e+06	22675.3	25525.5	45009.4	112377	73961.6	19782.2	1.28986e+07	19055.6	2.35467e+06	1.08127e+06	22680.5	5.39523e+06	19852.6	1.8888e+06
	TRUE	tert-butyl octahydropyrrolo[3,4-c]pyrrole-2-carboxylate	C11 H20 N2 O2	Full match	No results	No results	Full match	No results	-1.14	212.15224	12.533	2835911.663	200	0	0				No matches found	No matches found	No matches found	No matches found	DDA for preferred ion	[M+H]+1	80748.1	508855	2.83591e+06	97878.9	354124	102287	78582.6	116546	108847	214834	127388	112065	643118	84261.7	122941	45740.2	103515	456717	62998	110748	91588.6	71509.8	300332	97426.9	140244
	TRUE	tert-butyl octahydropyrrolo[3,4-c]pyrrole-2-carboxylate	C11 H20 N2 O2	Full match	No results	No results	Full match	No results	-1.07	212.15225	13.452	2100582.363	200	0	0				No matches found	No matches found	No matches found	No matches found	DDA for preferred ion	[M+H]+1	77773.8	95278	102837	112868	69871	102974	105796	706558	133464	39131.5	112603	89395.3	101390	88461.8	107038	103822	74037.4	108321	106988	94764.8	59358.1	249148	112227	81093.5	118835
	TRUE	Butyldiglycol acetate	C10 H20 O4	Full match	No results	No results	Full match	No results	-0.49	204.13606	13.992	2882976.012	77	0	0				No matches found	No matches found	No matches found	No matches found	DDA for other ion	[M+H]+1	177023	206296	249165	270070	153480	363583	339158	210768	343241	232507	203776	407430	353827	203139	238250	227648	279621	1.57678e+06	376519	254154	235664	240940	236179	373025	266078
	TRUE	DEET	C12 H17 N O	Full match	No results	No results	Full match	No results	-1.56	191.13072	8.744	1401437.244	610	0	0				No matches found	No matches found	No matches found	No matches found	No MS2	[M+H]+1	42616.2	80531.4	44686.7	45934.2	41501.1	45243.2	43317.3	43510.6	277901	48665.3	141305	33398.5	44691.7	44484.1	114962	46306.1	49870.5	201088	37053.1	50821.5	67650	47034.2	54052.8	39245.7	231463
	TRUE	3-Morpholinopropylamine	C7 H16 N2 O	Full match	No results	No results	Full match	No results	-1.23	144.12609	6.926	932277.5096	133	0	0				No matches found	No matches found	No matches found	No matches found	DDA for other ion	[M+H]+1	141850	440708	51258.5	728605	55936.4	55191	92962.5	219894	46339	80834.1	49735.4	151727	262675	139803	50031.3	83666.9	672954	58794.3	116852	48486.6	153858	88283.6	56066.1	62942.6	49787.9
	TRUE	Myristamide	C14 H29 N O	Full match	No results	No results	Full match	No results	-0.4	227.22482	7.489	2214517.598	70	0	0				No matches found	No matches found	No matches found	No matches found	No MS2	[M+H]+1	105064	129452	90769.9	91222	128803	107603	646215	127190	170539	144537	623838	125483	169294	62674.3	111188	131609	120868	118270	75143.4	159722	143096	98814.2	70680.6	86310.1	149276
	TRUE	1,3-Dicyclohexylurea	C13 H24 N2 O	Full match	No results	No results	Full match	Full match	-0.73	224.1887	14.757	2676442.782	69	0	0				No matches found	No matches found	No matches found	Single match found	DDA for preferred ion	[M+H]+1	1.83841e+06	29521.4	35179.8	32730.5	37060	34241.8	33804.1	34851.2	28297.3	34485.7	26146.1	25206.7	34778.3	26002.4	33993.9	34553.9	27738.8	33574.3	35452.7	28136.4	27465.5	34610.3	34879.3	386993	35406.8
	TRUE	tert-butyl octahydropyrrolo[3,4-c]pyrrole-2-carboxylate	C11 H20 N2 O2	Full match	No results	No results	Full match	No results	-1.15	212.15223	7.814	4682343.588	200	0	0				No matches found	No matches found	No matches found	No matches found	DDA for preferred ion	[M+H]+1	180883	225888	231345	210884	598870	110490	207469	2.16762e+06	347800	245329	317363	134625	169228	61095.4	225040	128033	151056	243997	402326	158039	183858	138972	209253	178761	363957
	TRUE		C3 H4 P2 Si	Full match	No results	No results	No match	No results	-2.29	129.95545	2.726	68632794.6	1	0	0				No matches found	No matches found	No matches found	No matches found	DDA for preferred ion	[M+H]+1	1.74169e+07	1.1317e+07	9.84926e+06	2.5662e+07	7.20985e+06	4.10434e+06	1.00714e+07	4.17043e+06	6.86328e+07	5.79549e+06	8.42431e+06	1.78293e+07	8.52367e+06	3.04892e+07	1.08815e+07	1.02342e+07	1.1285e+07	1.02305e+07	1.13867e+07	1.96732e+07	1.17322e+07	7.63191e+06	2.24348e+07	1.1414e+07	1.02931e+07
	TRUE		C3 H4 P2 Si	Full match	No results	No results	No match	No results	-2.15	129.95547	7.543	12239464.73	1	0	0				No matches found	No matches found	No matches found	No matches found	No MS2	[M+H]+1	1.75866e+06	1.91306e+06	2.25351e+06	8.79055e+06	2.39309e+06	1.22395e+07	1.49107e+06	1.7762e+06	1.90491e+06	997081	2.10532e+06	2.29854e+06	1.7009e+06	1.64959e+06	2.15221e+06	2.30372e+06	2.32322e+06	1.97356e+06	1.6242e+06	1.83344e+06	1.532e+06	1.56033e+06	989289	1.93737e+06	1.39258e+06
	TRUE	4-(1-Pyrrolidinyl)piperidine	C9 H18 N2	Full match	No results	No results	Full match	No results	-0.77	154.14688	8.93	3253553.741	152	0	0				No matches found	No matches found	No matches found	No matches found	DDA for preferred ion	[M+H]+1	71803.7	49839.6	35356.9	42386.7	59203.9	1.30669e+06	143097	50715.3	150811	570563	51656.2	3.25355e+06	34898.8	46192	51606	44377.5	50333.8	44506.8	33002.3	46058.5	104477	45277.2	1.70265e+06	38873.3	1.98487e+06
	TRUE	1,3-Dicyclohexylurea	C13 H24 N2 O	Full match	No results	No results	Full match	Full match	-0.17	224.18883	10.419	1854487.203	69	0	0				No matches found	No matches found	No matches found	Single match found	DDA for preferred ion	[M+H]+1	41324.9	47128.8	39724.8	47560.8	55113.3	53954.9	45289.5	47695.1	1.85449e+06	48703.5	53775.9	52229	47289.2	46487.2	47422.4	50040.4	39467.4	45946.6	52585.8	47598.8	45110.5	638821	369463	47359.5	51185.7
	TRUE	1,3-Dicyclohexylurea	C13 H24 N2 O	Full match	No results	No results	Full match	Full match	-0.36	224.18878	9.593	1534652.623	69	0	0				No matches found	No matches found	No matches found	Single match found	DDA for preferred ion	[M+H]+1	37067.1	33430	39118.6	38819.3	37573.6	35312.2	32477.3	1.53465e+06	39041.5	37663.3	34190.9	33379.2	57417.1	38194.7	37121.1	34813.3	36428.4	35203.9	35418.8	40916.9	27017.8	38795.7	35879.9	35509.6	39229.2
	TRUE	4-(1-Pyrrolidinyl)piperidine	C9 H18 N2	Full match	No results	No results	Full match	No results	-0.68	154.14689	11.745	6773679.396	152	0	0				No matches found	No matches found	No matches found	No matches found	DDA for preferred ion	[M+H]+1	40026.4	38122.2	30442.4	120104	41514.7	1.77131e+06	78994.4	40965.4	45587	45977	37145.1	52532.4	97896.2	46061.5	41745.6	85979.6	47046.4	41633.7	1.65504e+06	2.73766e+06	30020	36639.4	41096.2	81119	46820.9
	TRUE	3-Morpholinopropylamine	C7 H16 N2 O	Full match	No results	No results	Full match	No results	-1.27	144.12608	6.926	471176.3251	133	0	0				No matches found	No matches found	No matches found	No matches found	DDA for other ion	[M+H]+1	90886.7	78608.6	48579.7	254360	46869.1	52306.7	57013.8	219894	43917.3	63255.7	47136.1	40823.7	262675	114854	47416.6	58226.1	400078	55721.6	88001.4	45952.6	111978	46351.5	30103.2	55962.2	47186
	TRUE	3,5-DIMETHYLPYRAZOL-1-METHANOL	C6 H10 N2 O	Full match	No results	No results	Full match	No results	-2.28	126.07903	7.026	520323.9292	187	0	0				No matches found	No matches found	No matches found	No matches found	DDA for preferred ion	[M+H]+1	68146.3	66571	57965.1	90461	70098.6	64899.1	42949.3	520324	119009	79734.1	60501.8	98755.8	476157	86367.7	98204.7	66113.1	72983	59593.1	480860	40332.2	116946	46512.2	212974	90924.8	33514.1
	TRUE	tert-butyl octahydropyrrolo[3,4-c]pyrrole-2-carboxylate	C11 H20 N2 O2	Full match	No results	No results	Full match	No results	-0.77	212.15231	25.527	1302015.281	200	0	0				No matches found	No matches found	No matches found	No matches found	DDA for preferred ion	[M+H]+1	307832	38500	50110.9	143577	360793	45308.8	370802	67266.2	84507.1	412435	101148	341789	50115.9	47975.4	45766	43863.9	44951.4	56280.2	46035.5	45800.9	44791.6	90913.1	39877.1	45674.4	82146.6
	TRUE	4-(1-Pyrrolidinyl)piperidine	C9 H18 N2	Full match	No results	No results	Full match	No results	-1.15	154.14682	7.29	1299640.383	152	0	0				No matches found	No matches found	No matches found	No matches found	DDA for preferred ion	[M+H]+1	214948	67794	42597.7	52710.4	39614.1	75301.5	81661.6	93802.2	62495.6	50743.3	109408	62589.7	63644.4	67281	56734.8	56992.7	62072.4	49973.5	56020.7	56614.4	59877.1	55666.1	34767.5	166892	56029.2
	TRUE	Damascenone	C13 H18 O	Full match	No results	No results	Full match	No results	-1.09	190.13556	6.895	2693992.866	480	0	0				No matches found	No matches found	No matches found	No matches found	No MS2	[M+ACN+H]+1	1.07618e+06	352174	33471	1.91856e+06	47657.6	37282.2	1.78496e+06	1.11271e+06	31641.3	2.69399e+06	31957.4	33556.9	31121.4	29016.1	32554.9	997830	1.71612e+06	38712.6	53007.5	33079.2	31903	70947	25989.6	230212	31804.6
	TRUE	4-Benzylpiperidine	C12 H17 N	Full match	No results	No results	Full match	No results	-0.73	175.13597	7.489	2263469.132	272	0	0				No matches found	No matches found	No matches found	No matches found	No MS2	[M+H]+1	66229.2	87562.6	862381	42960.5	49159.6	363781	46527.9	46481.4	90832.8	57588.7	428108	488224	47207.5	49434.8	79163.6	46022.4	55177.6	356602	45745.9	45871.5	45975.4	109791	28165	83120.2	47397.2
	TRUE	tert-butyl octahydropyrrolo[3,4-c]pyrrole-2-carboxylate	C11 H20 N2 O2	Full match	No results	No results	Full match	No results	-0.6	212.15235	14.709	1757155.139	200	0	0				No matches found	No matches found	No matches found	No matches found	DDA for preferred ion	[M+H]+1	1.75716e+06	80661	92882.9	114347	95049.9	86023.5	46614.8	88976.5	90940.2	84881.1	69397.6	75186	87188.8	70220.2	92047.1	90373.9	64383.2	87516.3	114810	76191.3	87878.7	89419.2	138630	93780.5	105174
	TRUE	CYCLURON	C11 H22 N2 O	Full match	No results	No results	Full match	No results	-0.51	198.17311	12.095	19472523.09	135	0	0				No matches found	No matches found	No matches found	No matches found	DDA for preferred ion	[M+H]+1	353923	416466	390009	334380	436386	573466	315310	606033	1.13917e+07	307691	529529	436417	464893	347243	278194	365028	603582	456726	313928	1.94725e+07	532870	77690.5	1.06702e+06	610061	582507
	TRUE	tert-butyl octahydropyrrolo[3,4-c]pyrrole-2-carboxylate	C11 H20 N2 O2	Full match	No results	No results	Full match	No results	-0.93	212.15228	14.77	1538776.01	200	0	0				No matches found	No matches found	No matches found	No matches found	DDA for preferred ion	[M+H]+1	167943	65210.7	60748	57623.1	108199	56390.9	72734.6	71028.1	51698.6	173039	53869.5	899793	57274.4	84138.2	62800.6	56904.8	43924.1	217344	90086.8	52947.7	46790.3	73139.5	44416.4	66262.1	65481.8
	TRUE	tert-butyl octahydropyrrolo[3,4-c]pyrrole-2-carboxylate	C11 H20 N2 O2	Full match	No results	No results	Full match	No results	-1.19	212.15222	11.892	1842119.666	200	0	0				No matches found	No matches found	No matches found	No matches found	No MS2	[M+H]+1	40350.7	69449.8	1.378e+06	56448.2	257709	76666.1	77566.7	100685	43772.4	46488.6	61126.2	60150.7	725552	34838.2	87652.8	105346	75365.4	1.84212e+06	50245.3	72482.8	57702.8	40151.4	52250.2	1.27912e+06	90609.4
	TRUE	1,3-Dicyclohexylurea	C13 H24 N2 O	Full match	No results	No results	Full match	Full match	-0.77	224.18869	8.945	2138191.313	69	0	0				No matches found	No matches found	No matches found	Single match found	DDA for preferred ion	[M+H]+1	33643.7	33091.1	29574	35388.2	37035	649677	30360.8	31720.9	27048.4	295350	30362.8	512342	33792.5	29948.8	44906.5	29465.5	33420.4	30368.6	21225.3	30442.8	32335.5	29960.3	652365	41263.9	1.80273e+06
	TRUE	Myristamide	C14 H29 N O	Full match	No results	No results	Full match	No results	-1.18	227.22465	7.51	11872295.75	70	0	0				No matches found	No matches found	No matches found	No matches found	No MS2	[M+H]+1	367751	413623	1.28341e+06	374325	384099	982024	646215	425482	534693	30239.5	623837	786237	347046	379994	463528	399654	400238	467239	350628	478114	341387	292576	347439	363761	424044
	TRUE	Acrylamide	C3 H5 N O	Full match	No results	No results	Full match	No results	-1.58	71.037	12.298	20725300.7	29	0	0				No matches found	No matches found	No matches found	No matches found	No MS2	[M+H]+1	628495	836590	694455	1.00371e+06	748753	669447	747467	918936	958063	764871	597048	809728	693053	703561	685792	730751	739274	733959	2.07253e+07	832669	659736	864410	941656	676988	761351
	TRUE	1,3-Dicyclohexylurea	C13 H24 N2 O	Full match	No results	No results	Full match	Full match	-0.64	224.18872	12.152	1427590.614	69	0	0				No matches found	No matches found	No matches found	Single match found	No MS2	[M+H]+1	53123.5	93875.8	80869.7	200454	266870	292817	116462	78135.3	744903	95295.5	82245.4	96421.8	92350.4	90125.7	88205.6	95913.8	92006.9	99189.3	92338.3	101356	88036.9	1.42759e+06	63241.5	97589.4	98145.1
	TRUE	Methylcyclohexylamine	C7 H15 N	Full match	No results	No results	Full match	No results	-1.87	113.12024	11.9	1491280.983	113	0	0				No matches found	No matches found	No matches found	No matches found	No MS2	[M+H]+1	34367.6	46008.3	44789.8	34447.3	46535.5	47093.3	26105.8	36446.7	42733.1	40835.2	34993.5	25400.1	41702.7	41881	37450	44065.3	43921.4	1.49128e+06	40566.6	44238	40178.4	35198.1	28607.6	943760	39770.5
	TRUE	4-(1-Pyrrolidinyl)piperidine	C9 H18 N2	Full match	No results	No results	Full match	No results	-0.76	154.14688	9.674	7564849.612	152	0	0				No matches found	No matches found	No matches found	No matches found	DDA for preferred ion	[M+H]+1	66907	6.61052e+06	39710.1	76896.9	164381	59079.9	108473	74264	2.35446e+06	162791	56745	1.13007e+06	126143	68510.8	109293	115540	64663.9	57886	60494.8	61359	40961.7	783599	58369.7	43020.1	77074.6
	TRUE	1-Phenylcyclohexene	C12 H14	Full match	No results	No results	Full match	Full match	-0.83	158.10942	10.437	1136248.567	145	0	0				No matches found	No matches found	No matches found	Single match found	DDA for preferred ion	[M+ACN+H]+1	13786.6	18678	15971.9	22174.2	24367.7	19365.3	16010.7	22062.4	1.13625e+06	22446.8	24609.5	23121.1	22012.5	21889.9	21230.8	23066.1	18717.6	21974.1	20552.2	20894.7	13616.9	591923	179611	21499.5	23452.1
	TRUE		C H3 F4 N Si2	Full match	No results	No results	No match	No results	-0.61	160.97392	0.547	27565564.06	3	0	0				No matches found	No matches found	No matches found	No matches found	DDA for preferred ion	[M+H]+1	1.53365e+07	8.01565e+06	2.42296e+06	2.14777e+06	1.50998e+06	1.77626e+06	2.0615e+06	1.74828e+07	5.20606e+06	1.92402e+07	2.50373e+06	2.26651e+06	1.21403e+07	2.84937e+06	2.69018e+06	1.63979e+07	2.03773e+07	2.19002e+06	1.64162e+07	1.08671e+07	2.11634e+06	1.87693e+06	2.33579e+07	1.3405e+07	1.52661e+06
	TRUE		C2 H5 N2 O2 P	Full match	No results	No results	No match	No results	2.2	120.00913	7.664	14201286.5	1	0	0				No matches found	No matches found	No matches found	No matches found	No MS2	[M+H]+1	599623	1.42013e+07	627924	406876	476384	337704	487681	570210	526879	670405	1.9138e+06	651414	507046	474158	524793	657337	434856	566833	476405	456203	548627	574095	465980	491731	455483
	TRUE	1,3-Dicyclohexylurea	C13 H24 N2 O	Full match	No results	No results	Full match	Full match	-1.06	224.18862	8.775	1699270.732	69	0	0				No matches found	No matches found	No matches found	Single match found	DDA for preferred ion	[M+H]+1	36996	21704.8	29833.2	31309.7	30552.1	31011.3	29549.7	469912	32097.3	34572.8	35297.1	29393.5	32104.2	31061.3	1.69927e+06	30618	34949.2	33124.9	22035	35057.5	37004.9	31669.2	33766.5	577234	31750.4
	TRUE	(3R,4R)-1-Benzyl-N,4-dimethylpiperidin-3-amine	C14 H22 N2	Full match	No results	No results	Full match	No results	-0.98	218.17808	7.53	2323340.457	158	0	0				No matches found	No matches found	No matches found	No matches found	No MS2	[M+H]+1	89246.1	30230.5	627668	27474.7	30273.1	392945	37024.7	29887.4	30500.7	447746	77601.4	99958.5	31744.4	31162.1	102708	29652.8	30911.4	34350.3	32450.6	522429	30555.6	88113.6	68576.7	31551.5	29823.3
	TRUE	Cyclopentane	C5 H10	Full match	No results	No results	Full match	Full match	-0.02	70.07825	20.519	10694053.96	16	0	0				No matches found	No matches found	No matches found	Single match found	No MS2	[M+H]+1	6.16416e+06	8.5322e+06	1.06941e+07	185054	362984	210731	227332	222243	213398	1.22067e+06	153689	256190	214106	414585	655438	236540	214719	6.05458e+06	309687	229844	314923	316909	532552	211421	406856
	TRUE		C H3 F4 N Si2	Full match	No results	No results	No match	No results	-0.35	160.97396	2.37	19719501.33	3	0	0				No matches found	No matches found	No matches found	No matches found	DDA for preferred ion	[M+H]+1	1.97195e+07	5.72786e+06	6.02964e+06	6.01699e+06	5.93854e+06	4.57649e+06	4.92493e+06	3.71922e+06	4.82816e+06	1.23411e+06	5.29105e+06	1.82049e+07	5.99258e+06	5.90845e+06	3.41151e+06	6.29593e+06	3.14149e+06	6.10408e+06	4.73102e+06	1.1358e+07	1.79695e+07	6.10168e+06	6.38426e+06	6.31456e+06	3.88549e+06
	TRUE	1,3-Dicyclohexylurea	C13 H24 N2 O	Full match	No results	No results	Full match	Full match	-0.64	224.18872	11.437	1446839.071	69	0	0				No matches found	No matches found	No matches found	Single match found	DDA for preferred ion	[M+H]+1	26091.7	33146.1	20530.5	22734.9	30279	856907	30703.9	1.30905e+06	1.44684e+06	31509.7	28090.8	18933.1	27348.3	22706.1	552085	33219.4	29627.5	40609.5	30320.1	32324.3	30341	32881.2	26217.4	29556.2	33625.7
	TRUE	4-Benzylpiperidine	C12 H17 N	Full match	No results	No results	Full match	No results	-1.1	175.13591	11.43	1472671.578	272	0	0				No matches found	No matches found	No matches found	No matches found	No MS2	[M+H]+1	46096.4	142745	29750.5	49206.5	45605.7	1.47267e+06	73893.5	322138	501874	142027	96466.1	41276.8	41109.6	28265.1	404667	126932	42508.3	260187	82447.7	50077.6	70364.7	605362	73364.4	46531.8	54542.8
	TRUE	Cyclohexylamine	C6 H13 N	Full match	No results	No results	Full match	Full match	-1.35	99.10467	8.821	15501248.37	91	0	0				No matches found	No matches found	No matches found	Single match found	No MS2	[M+H]+1	374317	590748	580946	500307	1.29833e+06	2.9551e+06	522321	1.12079e+07	632908	694711	569794	333067	580584	597953	1.55012e+07	572350	426651	609270	418374	694949	2.90694e+06	523025	48955	4.61981e+06	1.14474e+07
	TRUE		C H3 O2 P S2	Full match	No results	No results	Invalid mass	No results	-0.98	141.93107	10.66	2931369.605	1	0	0				No matches found	No matches found	No matches found	No matches found	DDA for other ion	[M+H]+1	133140	141437	530040	153280	119076	203398	107679	240314	167420	221284	112186	559164	150974	207247	183923	168749	149638	2.93137e+06	183817	203228	171493	161593	182217	153807	174179
	TRUE		C H3 F4 N Si2	Full match	No results	No results	No match	No results	-0.36	160.97396	0.891	44209454	3	0	0				No matches found	No matches found	No matches found	No matches found	No MS2	[M+H]+1	1.87956e+07	1.37817e+07	1.51975e+07	4.05821e+06	3.22108e+06	1.00417e+07	3.20976e+06	1.10291e+07	1.0652e+07	6.03467e+06	44209454	4.62067e+06	2.96526e+06	3.65551e+06	4.52927e+06	4.05611e+06	4.79163e+06	3.67148e+06	8.22197e+06	2.96506e+06	7.50762e+06	1.01875e+07	3.52272e+06	3.82035e+06	5.20303e+06
	TRUE	1,3-Dicyclohexylurea	C13 H24 N2 O	Full match	No results	No results	Full match	Full match	-0.82	224.18868	9.731	2100830.158	69	0	0				No matches found	No matches found	No matches found	Single match found	DDA for preferred ion	[M+H]+1	87618.3	2.10083e+06	43941.1	43786.5	119022	37924.9	42746.3	98987	678171	38059.5	38776.8	440876	45194.5	41173.2	38450.5	37238.3	1.45416e+06	37632.7	38389.4	39672.3	39031.7	168161	37799.6	237647	39893.3
	TRUE		C H6 F N4 P	Full match	No results	No results	No match	No results	0.09	124.03142	8.79	1336654.525	2	0	0				No matches found	No matches found	No matches found	No matches found	DDA for preferred ion	[M+H]+1	183009	61683.6	113673	78015.9	91660.1	697311	74868.6	1.33665e+06	118141	116460	108885	42908.8	126668	93276.5	564598	103360	130941	105608	53311.6	572970	87679.1	70649.7	101895	804163	113429
	TRUE	Cyclohexylamine	C6 H13 N	Full match	No results	No results	Full match	Full match	-1.17	99.10468	12.655	7800910.26	91	0	0				No matches found	No matches found	No matches found	Single match found	No MS2	[M+H]+1	420085	450843	166857	527872	121339	3.52638e+06	217956	3.52068e+06	553606	570321	481256	498713	3.53092e+06	481878	652642	573477	700537	494334	562589	554233	406723	563224	686835	592959	710445
	TRUE	4-(1-Pyrrolidinyl)piperidine	C9 H18 N2	Full match	No results	No results	Full match	No results	-1.36	154.14679	8.993	3253553.741	152	0	0				No matches found	No matches found	No matches found	No matches found	DDA for preferred ion	[M+H]+1	55880.2	56762.9	51766.5	54399.6	58629.6	1.30669e+06	53558.3	71024.8	64239.6	570563	37149.6	3.25355e+06	54272.4	50966.2	57397.5	51415.8	57193.1	50639.4	52099.3	53928.5	104477	49866.2	61758.6	63835.3	79498.4
	TRUE		C3 H4 P2 Si	Full match	No results	No results	No match	No results	-1.98	129.95549	10.763	12026828.33	1	0	0				No matches found	No matches found	No matches found	No matches found	No MS2	[M+H]+1	1.15762e+06	1.3387e+06	1.2145e+06	1.59761e+06	1.8036e+06	1.71194e+06	4.83168e+06	1.61051e+06	1.56272e+06	2.0865e+06	889233	1.62387e+06	1.42402e+06	1.75011e+06	1.93756e+06	1.80155e+06	1.50153e+06	1.60526e+06	1.70529e+06	1.69052e+06	1.14351e+06	1.53971e+06	1.46664e+06	1.63267e+06	1.40125e+06
	TRUE	methylpiperazine	C5 H12 N2	Full match	No results	No results	Full match	No results	-1.77	100.09987	8.396	1220007.863	89	0	0				No matches found	No matches found	No matches found	No matches found	DDA for preferred ion	[M+H]+1	52562.2	36610.8	109585	33543.7	35774.8	38298.2	169916	32493.4	35488.9	33612.2	34036.4	37038.7	38335.9	40727.3	35086	40048.3	36596.2	34439	33551	38254.9	36723.4	30148.3	33947.8	33352.1	41337.5
	TRUE	Cadaverine	C5 H14 N2	Full match	No results	No results	Full match	No results	-0.66	102.11563	25.015	3276676.656	38	0	0				No matches found	No matches found	No matches found	No matches found	No MS2	[M+H]+1	580754	580165	1.07148e+06	684344	618446	763758	631566	465883	579616	590885	567424	1.14029e+06	597452	589814	766659	1.48051e+06	662921	555444	1.30066e+06	596242	525660	999201	633857	1.51438e+06	595641
	TRUE	tert-butyl octahydropyrrolo[3,4-c]pyrrole-2-carboxylate	C11 H20 N2 O2	Full match	No results	No results	Full match	No results	-0.61	212.15235	13.241	1558430.846	200	0	0				No matches found	No matches found	No matches found	No matches found	DDA for preferred ion	[M+H]+1	48999.5	51408.2	901072	60459.4	31470.2	34309.4	36794.2	36747.1	848948	55356.8	1.55843e+06	412335	33285.7	743073	44300.1	43824.9	985903	40159.3	769222	55684.1	26360	120921	78636.9	423208	83252.5
	TRUE	N-tert-Butyl-α-phenylnitrone	C11 H15 N O	Full match	No results	No results	Full match	No results	-0.58	177.11526	7.728	5939126.926	725	0	0				No matches found	No matches found	No matches found	No matches found	No MS2	[M+H]+1	912082	370429	809306	586932	1.85225e+06	657888	739567	311531	301692	830762	485189	784377	5.93913e+06	638388	742694	736659	679974	935236	612174	1.93277e+06	247685	677675	670722	669573	606309
	TRUE	1,3-Dicyclohexylurea	C13 H24 N2 O	Full match	No results	No results	Full match	Full match	-0.07	224.18885	13.231	776205.0903	69	0	0				No matches found	No matches found	No matches found	Single match found	No MS2	[M+H]+1	66730.5	55620.9	80781.1	78402.5	62253.9	68172.9	73110.3	74453.3	770296	77463	76692.8	60745.6	68829.1	66660.7	78942.7	73013.7	776205	69869.5	73047.7	60670.2	52377.5	77577.5	72069.9	62076.4	68455.3
	TRUE	Mexiletine	C11 H17 N O	Full match	No results	No results	Full match	No results	-0.6	179.13091	12.829	1069153.622	482	0	0				No matches found	No matches found	No matches found	No matches found	DDA for other ion	[M+H]+1	177770	105593	88048	84716.7	57569.3	86114.9	93803.9	178944	84662	92120.9	110617	55246.9	193930	82609.4	80049.2	131392	52636.7	99218.4	84137.9	218375	67894.6	79872.1	84860.9	81078.4	83937.9
	TRUE	N,N-dimethylaminopropyl acrylamide	C8 H16 N2 O	Full match	No results	No results	Full match	No results	-1.1	156.12609	7.547	1337784.822	263	0	0				No matches found	No matches found	No matches found	No matches found	No MS2	[M+H]+1	39834	40454.8	279719	36482.1	42779.7	46751.1	57624.2	857395	40043.1	622104	45960.3	56979.8	41532.1	43103.5	50079.9	226312	42017.6	47722.8	40265.5	119502	39344.6	262438	24867.8	41977.8	41155.2
	TRUE		C H3 F4 N Si2	Full match	No results	No results	No match	No results	-0.22	160.97398	0.964	44209454	3	0	0				No matches found	No matches found	No matches found	No matches found	DDA for preferred ion	[M+H]+1	1.87956e+07	1.37817e+07	1.51975e+07	3.94936e+06	5.01933e+06	4.29633e+06	8.28252e+06	1.10291e+07	3.59958e+06	3.54675e+06	44209454	7.5154e+06	3.09387e+06	2.55195e+06	1.01864e+07	4.3072e+06	4.82578e+06	2.98916e+06	8.22197e+06	6.53963e+06	7.84573e+06	2.96677e+06	3.34441e+06	2.30622e+07	5.20303e+06
	TRUE		C2 H3 N2 O P	Full match	No results	No results	No match	No results	1.6	101.99846	7.543	8852455.196	4	0	0				No matches found	No matches found	No matches found	No matches found	No MS2	[M+H]+1	544774	547212	570169	404458	477315	613995	479227	613531	542746	852001	610292	574888	452937	479602	460580	497362	436617	620917	461574	507756	471768	470075	400439	520552	476622
	TRUE	Amphetamine	C9 H13 N	Full match	No results	No results	Full match	No results	-1.64	135.10458	6.906	597945.4859	194	0	0				No matches found	No matches found	No matches found	No matches found	DDA for other ion	[M+H]+1	227801	129545	42431.7	61031	52855.6	149065	66429.2	94634	40328.6	59692.7	47929.7	78189.4	41017.2	259006	55715.8	562559	178497	64200	40812.5	41304.9	42040.8	55597.3	54236.4	118820	39241.6
	TRUE	1-Boc-3-oxopiperazine	C9 H16 N2 O3	Full match	No results	No results	Full match	No results	-2.09	200.11567	6.94	1527609.088	144	0	0				No matches found	No matches found	No matches found	No matches found	DDA for preferred ion	[M+H]+1	54511.7	241070	72722.2	483837	50088.6	49710.4	50258.8	29772.5	211883	99429.7	142999	143320	80162.7	59372.5	70731.4	47754.4	656442	70870.9	70266.3	68593.9	173862	43158.7	60683.9	37960.2	64271.7
	TRUE	4-Chloropyrazole	C2 H3 N2 O P	Full match	No results	No results	No match	No results	1.44	101.99845	8.438	5513682.144	4	0	0				No matches found	No matches found	No matches found	No matches found	No MS2	[M+H]+1	5.51368e+06	870987	488278	513683	426733	572512	250668	526444	411000	485365	336494	443209	470352	521625	450402	397349	450471	3.02014e+06	308906	433534	534701	520677	497031	490690	417839
	TRUE	4-(1-Pyrrolidinyl)piperidine	C9 H18 N2	Full match	No results	No results	Full match	No results	-0.69	154.14689	9.51	6625978.885	152	0	0				No matches found	No matches found	No matches found	No matches found	DDA for preferred ion	[M+H]+1	37091.5	32681.4	47771.5	38320.8	50291.8	33970.5	81517.9	6.62598e+06	45531	33912.7	67963.3	34813.3	145420	31235.9	33995.6	54833.5	48206.9	33753	34224.7	39304.1	37295.1	36839.5	34009.9	35199.1	772003
	TRUE	[(1E)-3,4-Dimethyl-1-pentenyl](fluoro)dimethylsilane	C9 H19 F Si	Full match	No results	No results	Full match	No results	-1.85	174.12368	14.122	23207224.21	1	0	0				No matches found	No matches found	No matches found	No matches found	DDA for preferred ion	[M+H]+1	1.00022e+06	942469	426919	1.13232e+07	7.08931e+06	1.03938e+07	157399	87701.9	983770	97945	87948.8	98035.2	168960	449885	328476	124290	354309	344954	103813	81151.6	66193.6	2.32072e+07	1.30399e+07	1.47391e+07	100529
	TRUE		C H3 O2 P S2	Full match	No results	No results	Invalid mass	No results	-0.93	141.93108	7.6	2783539.711	1	0	0				No matches found	No matches found	No matches found	No matches found	No MS2	[M+H]+1	349565	632744	534912	916538	401819	2.31222e+06	549718	467245	376814	405437	540698	1.29623e+06	391484	412741	663396	2.12311e+06	443785	535344	481044	494154	243377	2.78354e+06	319302	402554	540528
	TRUE	(3R,4R)-1-Benzyl-N,4-dimethylpiperidin-3-amine	C14 H22 N2	Full match	No results	No results	Full match	No results	-0.76	218.17813	6.941	1034203.108	158	0	0				No matches found	No matches found	No matches found	No matches found	No MS2	[M+H]+1	55134.2	586466	34558.2	101257	37574.8	37291.1	36475.4	409283	365367	38140.3	33531.3	42356.2	292858	888415	32575.8	178107	598794	39638.7	96269.8	31901.1	439851	37340.3	40944.9	98689	32184.8
	TRUE		C2 H3 N2 O P	Full match	No results	No results	No match	No results	1.47	101.99845	9.788	6490008.631	4	0	0				No matches found	No matches found	No matches found	No matches found	DDA for other ion	[M+H]+1	407750	616259	531913	622106	538745	512861	608521	607752	412976	540553	6.10265e+06	587968	556775	516237	512199	580869	878149	462455	427562	560079	581708	489470	4.43333e+06	486318	459775
	TRUE	Tetraethylene glycol dimethyl ether	C10 H22 O5	Full match	No results	No results	Full match	No results	-0.85	222.14654	10.676	2030034.037	10	0	0				No matches found	No matches found	No matches found	No matches found	DDA for preferred ion	[M+H]+1	39101.3	63995	92725.7	84765.2	52682.8	54574.9	40289.2	184322	51068.8	114484	34268.3	51881.7	63265.6	53147.7	50468.8	59806.6	196268	56412.9	53094.3	50806.7	60284.8	343449	64971.1	53950.9	1.45307e+06
	TRUE	1-(3-Aminopropyl)-2-pyrrolidone	C7 H14 N2 O	Full match	No results	No results	Full match	No results	-1.62	142.11038	11.593	719901.5299	260	0	0				No matches found	No matches found	No matches found	No matches found	No MS2	[M+H]+1	719902	14772.7	13658.2	22999.4	19999.8	21109.5	13590.4	20961.5	20405.1	21814.8	15887.9	12026.4	17204.8	15790.4	18341.9	19250.6	19151.4	18052.1	19032.5	19350.4	49044.2	18711.8	11400.1	18224.3	20087
	TRUE	1-Phenylcyclohexene	C12 H14	Full match	No results	No results	Full match	Full match	-2.11	158.10922	7.512	785886.387	145	0	0				No matches found	No matches found	No matches found	Single match found	DDA for other ion	[M+ACN+H]+1	31653	39595.1	785886	28116.3	35331.8	476596	36170.6	30731	32496.3	28745.2	42009.5	177053	98712.2	38593.7	30861.4	32121.4	32820.1	40104.7	50008.2	32042.8	29977.3	379550	73816	115753	30951.2
	TRUE	Butoxytriglycol	C10 H22 O4	Full match	No results	No results	Full match	No results	-1.77	206.15144	7.548	817153.5865	31	0	0				No matches found	No matches found	No matches found	No matches found	No MS2	[M+H]+1	33748	32548.2	412997	29075.6	34418.8	37613.9	42661.3	229835	32217	817154	36977.7	38972.5	32979.3	33824.2	654315	67270.2	33805.6	38395.7	32395.9	98646.3	31655	120090	124478	33773.5	32027
	TRUE	3,5-ditert-butyl-4-hydroxybenzonitrile	C15 H21 N O	Full match	No results	No results	Full match	No results	-1.27	231.16202	7.855	989927.4348	323	0	0				No matches found	No matches found	No matches found	No matches found	No MS2	[M+H]+1	114072	49744.5	193364	36140.7	760240	52919.5	50583.7	157403	51890	54116.7	52181.6	52204	52451.8	46439.8	51818	52286.7	48504	51711.2	141278	51253.5	50307.3	49935.5	54529.3	989927	88760.1
	TRUE	Creatinine	C4 H7 N3 O	Full match	No results	No results	Full match	No results	-0.23	113.05889	15.319	795299.3682	62	0	0				No matches found	No matches found	No matches found	No matches found	DDA for other ion	[M+H]+1	121310	187387	75848.5	101793	117784	117340	190556	96608.6	75943.1	74956.6	53816.1	66865.1	79868.5	35528.3	43559.7	87962.3	795299	75947.5	68330.5	104671	246168	76910.1	74713.6	97484.5	76948.5
	TRUE	NH2-C5-NH-Boc	C10 H22 N2 O2	Full match	No results	No results	Full match	No results	-0.96	202.16793	24.982	3473878.805	54	0	0				No matches found	No matches found	No matches found	No matches found	DDA for other ion	[M+H]+1	1.99689e+06	3.26663e+06	446248	383564	790439	411449	870001	341901	398302	1.21816e+06	922593	1.41483e+06	3.47388e+06	615847	1.20987e+06	1.65825e+06	354233	2.67545e+06	2.34912e+06	447361	2.1007e+06	1.8656e+06	1.9013e+06	1.2393e+06	1.50365e+06
	TRUE	N,N-DIETHYLNIPECOTAMIDE	C10 H20 N2 O	Full match	No results	No results	Full match	No results	-0.59	184.15745	1.891	2373934.511	175	0	0				No matches found	No matches found	No matches found	No matches found	DDA for preferred ion	[M+H]+1	124561	111632	118859	122814	126144	120561	112468	128454	120874	137340	129200	124984	114442	136154	119479	122478	126558	114729	122512	121064	123027	119452	119371	123193	100578
	TRUE		C H3 O2 P S2	Full match	No results	No results	Invalid mass	No results	-1.15	141.93104	7.733	1909093.839	1	0	0				No matches found	No matches found	No matches found	No matches found	No MS2	[M+Na]+1	368272	450929	331554	1.59961e+06	311568	385841	416235	388288	539821	351489	554998	377607	445818	351332	402229	351162	336641	1.09028e+06	378788	415847	360536	403177	1.90909e+06	317020	504963
	TRUE	Butylcyclobutane	C8 H16	Full match	No results	No results	Full match	No results	-1.03	112.12509	20.517	7669665.288	158	0	0				No matches found	No matches found	No matches found	No matches found	DDA for preferred ion	[M+H]+1	5.15956e+06	7.01121e+06	7.66967e+06	289668	356773	207946	259102	267738	753853	230407	266183	223003	200747	939015	584365	752903	141197	4.9491e+06	487768	269046	221936	405752	190152	185173	426349
	TRUE	Cyclohexylamine	C6 H13 N	Full match	No results	No results	Full match	Full match	-1.38	99.10466	10.43	14336076.54	91	0	0				No matches found	No matches found	No matches found	Single match found	DDA for preferred ion	[M+H]+1	807761	1.12198e+06	1.08812e+06	1.09684e+06	1.63935e+06	1.01469e+06	1.15647e+06	1.29877e+06	1.43361e+07	1.69361e+06	1.39649e+06	1.28244e+06	1.22855e+06	1.19875e+06	1.1374e+06	1.14185e+06	986942	999992	1.28158e+06	1.52739e+06	761868	1.11344e+06	1.49764e+06	990223	1.65364e+06
	TRUE	3,5-ditert-butyl-4-hydroxybenzonitrile	C15 H21 N O	Full match	No results	No results	Full match	No results	-0.87	231.16211	12.15	1082211.725	323	0	0				No matches found	No matches found	No matches found	No matches found	No MS2	[M+H]+1	23596.5	40572.2	32956	31911.9	42014.9	40988.2	51730.2	32260	331943	41918.5	29981.7	42828.8	41020.3	40032.2	39179.3	42603.1	40206.1	44058	41014.9	45020.3	39104.3	1.08221e+06	26962.8	43347.4	43594.2
	TRUE		C H3 F4 N Si2	Full match	No results	No results	No match	No results	-0.66	160.97391	7.565	12245693.27	3	0	0				No matches found	No matches found	No matches found	No matches found	DDA for preferred ion	[M+H]+1	1.59403e+06	3.99099e+06	1.01538e+06	3.40234e+06	3.62582e+06	1.61824e+06	3.58695e+06	2.22064e+06	3.40825e+06	958890	5.00096e+06	3.91368e+06	3.51859e+06	3.73869e+06	1.71288e+06	1.33694e+06	3.76176e+06	4.38978e+06	3.39375e+06	1.22457e+07	3.59977e+06	3.65008e+06	3.34707e+06	3.6431e+06	3.66514e+06
	TRUE	(3R,4R)-1-Benzyl-N,4-dimethylpiperidin-3-amine	C14 H22 N2	Full match	No results	No results	Full match	No results	-1.22	218.17803	7.553	1273784.064	158	0	0				No matches found	No matches found	No matches found	No matches found	No MS2	[M+H]+1	89246.1	36473.8	1.27378e+06	32892	38569.9	46573.4	47806.6	145459	36102.6	359356	64629.1	43672.9	37445.1	38861.9	624031	36422.5	37882.8	43506.6	34990.9	520988	35472.8	142714	68576.7	37960.8	37105.2
	TRUE	1-(3-Aminopropyl)-2-pyrrolidone	C7 H14 N2 O	Full match	No results	No results	Full match	No results	-1.09	142.11046	13.481	551480.3392	260	0	0				No matches found	No matches found	No matches found	No matches found	No MS2	[M+H]+1	31213.3	38011.1	40224.4	46764.1	27719.9	41742	42072.9	45968	45930	43002.3	40262.6	36110.7	41990.3	30642	40630	43308.9	47130	40109.6	43597.3	26140.9	24379.6	42973.5	44442.4	28807.8	42626.2
	TRUE	Triethanolamine	C6 H15 N O3	Full match	No results	No results	Full match	No results	-0.33	149.10514	1.989	6708780.628	9	0	0				No matches found	No matches found	No matches found	No matches found	DDA for preferred ion	[M+H]+1	621114	148216	439866	67594.8	72811.3	70864.1	249843	756849	202916	320431	435837	830214	837428	488993	1.33943e+06	465218	165848	833557	359782	1.28911e+06	176560	363390	492321	1.44941e+06	1.44595e+06
	TRUE	6-Amino-N-(7-amino-2,3-dimethyl-2-heptanyl)hexanamide	C15 H33 N3 O	Full match	No results	No results	Full match	No results	-0.51	271.26222	7.826	820296.8455	2	0	0				No matches found	No matches found	No matches found	No matches found	No MS2	[M+H]+1	30073.6	31712.3	32244.5	26370.1	124794	32628.2	31509.4	34421.6	31568.3	31852	34614.5	31181.1	32362.9	29658.1	33126.6	31729.4	29151.1	33388.3	25941	31794	30692.5	30304.5	33440.8	29854.5	34336.1
	TRUE	Butoxytriglycol	C10 H22 O4	Full match	No results	No results	Full match	No results	-0.51	206.1517	13.986	641861.683	31	0	0				No matches found	No matches found	No matches found	No matches found	No MS2	[M+H]+1	34706.4	41764.6	48382.4	89379.6	34075.2	46262.2	49838.8	47747.1	46745.5	47433.9	42839.6	49662.7	46189	33772.8	48118.4	51147.4	46947.3	391887	50108.1	35132.6	30359.7	50023.5	45250.9	38173.9	46753.7
	TRUE		C H3 F4 N Si2	Full match	No results	No results	No match	No results	-0.54	160.97393	8.543	22316301.71	3	0	0				No matches found	No matches found	No matches found	No matches found	DDA for preferred ion	[M+H]+1	5.70939e+06	4.86238e+06	5.65216e+06	2.23163e+07	5.84431e+06	5.93699e+06	4.55458e+06	4.93113e+06	4.65968e+06	4.99255e+06	4.79346e+06	5.17559e+06	5.73341e+06	1.68542e+07	5.26018e+06	5.73583e+06	6.30425e+06	2.09095e+06	4.55494e+06	1.2266e+06	5.14574e+06	5.87039e+06	5.44038e+06	5.59e+06	4.37733e+06
	TRUE	L-(+)-Valinol	C5 H13 N O	Full match	No results	No results	Full match	No results	-1.6	103.09955	7.556	14878189.72	76	0	0				No matches found	No matches found	No matches found	No matches found	No MS2	[M+H-H2O]+1	1.48782e+07	1.69536e+06	1.19964e+07	1.27448e+06	1.94665e+06	1.0893e+07	1.65072e+06	1.7506e+06	1.79511e+06	976039	1.84943e+06	1.66754e+06	1.53678e+06	1.92981e+06	597604	1.06829e+07	1.86492e+06	1.81147e+06	1.44759e+06	1.48028e+06	1.47218e+06	1.26937e+06	955224	1.64485e+06	1.53652e+06
	TRUE	6-Amino-N-(7-amino-2,3-dimethyl-2-heptanyl)hexanamide	C15 H33 N3 O	Full match	No results	No results	Full match	No results	-1.6	271.26193	7.629	647700.7947	2	0	0				No matches found	No matches found	No matches found	No matches found	No MS2	[M+H]+1	85555.9	30484.8	34868.2	30409	27435.3	31196.1	27838	29666.1	24544.4	26750.3	28569.3	30122.2	26407.9	25945.7	40679.1	36353.3	26873.9	30170.3	25043.7	26379.8	24935.8	15433.2	34817	28046.1	37253.8
	TRUE		C H3 F4 N Si2	Full match	No results	No results	No match	No results	-0.74	160.9739	6.824	13723747.53	3	0	0				No matches found	No matches found	No matches found	No matches found	DDA for preferred ion	[M+H]+1	6.40734e+06	7.06432e+06	6.20321e+06	6.33046e+06	6.42385e+06	1.60983e+06	5.37875e+06	1.29586e+07	5.07638e+06	5.63433e+06	6.04062e+06	5.11872e+06	6.27232e+06	6.00145e+06	6.51086e+06	1.37237e+07	7.28245e+06	1.02636e+07	5.43963e+06	6.15225e+06	6.29117e+06	1.11334e+06	6.15893e+06	1.03451e+06	4.95138e+06
	TRUE	Tetraethylene glycol dimethyl ether	C10 H22 O5	Full match	No results	No results	Full match	No results	0.27	222.14678	10.436	709380.631	10	0	0				No matches found	No matches found	No matches found	No matches found	DDA for preferred ion	[M+H]+1	158818	77691.4	128279	80464.7	44292.4	89372.3	71329.7	80058.8	424238	81454	61338.6	45990.6	80189.3	47347	100525	86572.2	67921.6	79738.5	85658.4	78711.7	71277.3	167801	124966	79315.9	169016
	TRUE	4-Benzylpiperidine	C12 H17 N	Full match	No results	No results	Full match	No results	-1.5	175.13584	13.828	706823.9853	272	0	0				No matches found	No matches found	No matches found	No matches found	No MS2	[M+H]+1	30399.1	38460.1	41496.2	42538.8	36549.6	94550.9	44845.1	42758.2	44455.6	42912.4	37850	706824	99305.4	29610.6	41301	43410.4	42461.8	41340	42004.6	29143.1	44072.5	44072.3	74678.8	70837.2	43018.9
	TRUE	1,3-Dicyclohexylurea	C13 H24 N2 O	Full match	No results	No results	Full match	Full match	-0.85	224.18867	7.274	704860.4239	69	0	0				No matches found	No matches found	No matches found	Single match found	DDA for preferred ion	[M+H]+1	40264.5	43458.9	40181.4	38916.4	40056.4	38264.2	39932.5	39852.2	44473.5	36151	39136.3	43261.6	45030.4	46057.6	39947.3	40417.4	45884	35580.6	40051.2	39740.1	42808.2	38649.6	24856.5	43052	40057.3
	TRUE	N-tert-Butyl-α-phenylnitrone	C11 H15 N O	Full match	No results	No results	Full match	No results	-0.58	177.11526	7.567	3139589.947	725	0	0				No matches found	No matches found	No matches found	No matches found	No MS2	[M+H]+1	300594	285808	803793	266633	258112	309728	316545	541099	269152	617832	363394	307301	278501	264476	433320	945235	261167	301732	240814	179908	267115	3.13959e+06	199437	305904	290568
	TRUE	tert-butyl octahydropyrrolo[3,4-c]pyrrole-2-carboxylate	C11 H20 N2 O2	Full match	No results	No results	Full match	No results	-1.28	212.15221	14.504	1436195.281	200	0	0				No matches found	No matches found	No matches found	No matches found	DDA for preferred ion	[M+H]+1	46187.3	57452.1	63140.4	55518.5	50752.3	103923	55926.8	68982.9	57689.8	75874	44054.3	85451	52764.6	40051.1	828211	76554.2	36697.5	55256.8	66167.8	43140.7	153904	54816.5	45244.6	1.4362e+06	62997.4
	TRUE	ethylhexyl methacrylate	C12 H22 O2	Full match	No results	No results	Full match	No results	1.33	198.16224	6.835	39305977.53	699	0	0				No matches found	No matches found	No matches found	No matches found	DDA for preferred ion	[M+H]+1	3.51093e+06	3.85834e+06	3.79287e+06	1.19541e+06	2.61113e+06	3.60863e+06	1.16728e+06	2.24621e+06	4.24273e+06	2.30297e+06	3.9925e+06	4.15237e+06	3.99997e+06	4.0472e+06	3.67615e+06	3.75971e+06	4.64036e+06	3.76612e+06	3.9306e+07	3.83719e+06	3.7279e+06	2.39278e+07	1.56216e+06	892110	4.20823e+06
	TRUE	Lauramine	C12 H25 N O	Full match	No results	No results	Full match	No results	-1.67	199.19328	7.848	1901509.642	97	0	0				No matches found	No matches found	No matches found	No matches found	DDA for preferred ion	[M+H]+1	166601	176143	222954	185661	555121	169493	844426	285085	288722	215716	244158	209293	1.15851e+06	178054	194555	117400	107744	209978	368692	143112	138558	120089	198225	808772	309814
	TRUE		C H3 O2 P S2	Full match	No results	No results	Invalid mass	No results	-1.22	141.93103	12.155	1254506.865	1	0	0				No matches found	No matches found	No matches found	No matches found	No MS2	[M+H]+1	94004.9	102973	58468.5	1.08168e+06	76200.5	74133.3	77395.8	74799	612342	195672	70515.5	77266	84237.4	1.25451e+06	106032	132346	61053.5	32789	62281.8	87481.5	59380.5	605482	137048	106755	77988.4
	TRUE		C H3 O2 P S2	Full match	No results	No results	Invalid mass	No results	-1.3	141.93102	11.887	1597489.995	1	0	0				No matches found	No matches found	No matches found	No matches found	No MS2	[M+H]+1	95057.8	1.59749e+06	50495.8	40828	134519	201020	63524.8	66209.5	92194.8	976531	46134.3	111530	249054	67310	85421.2	98934.1	119188	597016	79213	70929.1	75239.9	81231.5	130712	365137	401688
	TRUE	4-Benzylpiperidine	C12 H17 N	Full match	No results	No results	Full match	No results	-1.04	175.13592	10.351	912019.134	272	0	0				No matches found	No matches found	No matches found	No matches found	No MS2	[M+H]+1	43038.7	37914.6	85232.7	35604.7	77243	57730.3	27056.2	38817.7	840596	53287.4	88900.6	54497.8	38424.2	44367.6	188304	912019	32712.1	37567.2	62998.2	39491.5	77157.1	221942	224208	39903.1	272823
	TRUE	N-Carbethoxypiperazine	C7 H14 N2 O2	Full match	No results	No results	Full match	No results	-0.54	158.10544	12.581	3568239.513	274	0	0				No matches found	No matches found	No matches found	No matches found	DDA for preferred ion	[M+H]+1	191780	265331	614051	200949	494438	319156	249123	705288	230439	201904	202455	250855	527849	2.39767e+06	211070	152209	259395	205789	3.56824e+06	237269	205139	201997	248118	181157	196718
	TRUE		C3 H4 P2 Si	Full match	No results	No results	No match	No results	-2.36	129.95544	11.822	25491795.54	1	0	0				No matches found	No matches found	No matches found	No matches found	No MS2	[M+H]+1	3.76862e+06	5.28571e+06	3.41345e+06	4.83142e+06	6.06516e+06	2.14584e+06	3.27544e+06	4.86788e+06	5.63548e+06	6.38427e+06	4.45742e+06	3.78013e+06	902267	1.09855e+07	5.35261e+06	6.34117e+06	6.15912e+06	2.54918e+07	6.38228e+06	6.14853e+06	4.18949e+06	5.04206e+06	3.35865e+06	6.39598e+06	5.64751e+06
	TRUE	NH2-C5-NH-Boc	C10 H22 N2 O2	Full match	No results	No results	Full match	No results	-0.88	202.16795	25.016	3473878.805	54	0	0				No matches found	No matches found	No matches found	No matches found	No MS2	[M+H]+1	842619	896088	1.89973e+06	2.29866e+06	604530	411449	510916	501910	360558	1.21816e+06	2.76016e+06	523427	3.47388e+06	713411	694196	1.65825e+06	1.04727e+06	2.67545e+06	557930	1.83113e+06	2.1007e+06	486280	605020	533526	568543
	TRUE	4-Benzylpiperidine	C12 H17 N	Full match	No results	No results	Full match	No results	-1.04	175.13592	14.98	855240.3001	272	0	0				No matches found	No matches found	No matches found	No matches found	DDA for preferred ion	[M+H]+1	63232.4	40344.2	51836.5	52475.7	51987.4	247975	52433.6	49988.2	36698.5	52473.9	40309.7	40301.1	49180.8	72985.3	49323.3	50603.5	40308.4	51451	52611.4	43424.9	54208	855240	260526	54747.9	50047.7
	TRUE		C H3 O2 P S2	Full match	No results	No results	No match	No results	-0.83	141.93109	9.488	2147439.203	1	0	0				No matches found	No matches found	No matches found	No matches found	No MS2	[M+H]+1	291794	319622	368844	1.09301e+06	354769	304662	356986	332269	367719	304937	321277	274237	232258	374613	378977	265480	378466	256018	243645	344556	356268	399664	315520	381033	2.14744e+06
	TRUE	2-((2-(N-(2,2,6,6-Tetramethyl-4-piperidyl))aminoethyl)amino)ethanol	C13 H29 N3 O	Full match	No results	No results	Full match	No results	-1.15	243.23078	7.645	695873.805	4	0	0				No matches found	No matches found	No matches found	No matches found	No MS2	[M+H]+1	310335	32748.7	34122.1	30693.5	27518.9	34364.1	28901.8	29658.6	26663.3	32757.7	288165	30506	27154.9	26971.2	38208.2	30936.6	28102.4	31248.5	26240.8	28940.9	114136	29241.6	52945.1	28328.8	185575
	TRUE		C H3 F4 N Si2	Full match	No results	No results	No match	No results	-0.08	160.974	9.785	10887882.58	3	0	0				No matches found	No matches found	No matches found	No matches found	No MS2	[M+H]+1	1.11888e+06	1.20147e+06	1.25889e+06	1.31119e+06	1.27679e+06	1.30624e+06	1.15228e+06	1.23492e+06	815143	1.23403e+06	1.39203e+06	1.08879e+07	1.39361e+06	1.38722e+06	1.1763e+06	1.32523e+06	608702	1.31652e+06	1.25737e+06	1.22508e+06	1.25631e+06	1.45289e+06	1.27577e+06	1.30846e+06	1.06743e+06
	TRUE	2,6,7-Trimethyl-2,4,6,7-tetraaza-1-phosphabicyclo[2.2.2]octane	C6 H15 N4 P	Full match	No results	No results	Full match	No results	2.8	174.10392	7.536	1479609.218	1	0	0				No matches found	No matches found	No matches found	No matches found	DDA for preferred ion	[M+H]+1	105978	135351	479660	123647	96213.3	1.47961e+06	120717	191154	138942	325033	161897	177341	112054	139812	204752	357868	136498	133727	85119.9	312215	88152.3	246845	91892.7	102177	143811
	TRUE	Glaurin	C16 H32 O4	Full match	No results	No results	Full match	No results	-0.99	288.22978	25.258	657424.9858	46	0	0				No matches found	No matches found	No matches found	No matches found	No MS2	[M+H]+1	87659.6	89094.5	90995.9	75150.4	84679.6	89464.7	86892.1	82937.6	85212.8	79745.9	657425	85355.6	84426.5	86789.4	85768.5	47727.3	85246.4	89758.5	93395.1	90312.2	92567.8	89523.1	90880.2	88536.3	87475.3
	TRUE		C H2 F2 I P S Si2	Full match	No results	No results	No match	No results	0.17	297.81666	2.003	1825351.636	1	0	0				No matches found	No matches found	No matches found	No matches found	DDA for other ion	[M+H]+1	143259	132594	145762	658755	66737.2	115297	335277	438256	69013.3	85726.9	149435	1.82535e+06	415469	1.08886e+06	362615	382848	1.28439e+06	150935	129013	165905	163513	777754	400261	106785	407994
	TRUE		C2 H5 N2 O2 P	Full match	No results	No results	No match	No results	1.62	120.00906	8.659	11886160.76	1	0	0				No matches found	No matches found	No matches found	No matches found	DDA for preferred ion	[M+H]+1	2.03891e+06	1.71936e+06	1.90065e+06	2.97881e+06	1.76123e+06	1.95663e+06	2.01535e+06	1.90009e+06	1.98329e+06	2.01648e+06	358662	1.97933e+06	1.91398e+06	1.97254e+06	1.91834e+06	1.9475e+06	2.15521e+06	1.84721e+06	1.42402e+06	1.56639e+06	3.19053e+06	2.05466e+06	1.74848e+06	1.8023e+06	1.99672e+06
	TRUE	(3R,4R)-1-Benzyl-N,4-dimethylpiperidin-3-amine	C14 H22 N2	Full match	No results	No results	Full match	No results	-1.16	218.17804	7.67	829952.9504	158	0	0				No matches found	No matches found	No matches found	No matches found	No MS2	[M+H]+1	267235	254743	40988.3	39116.6	36204.6	27576.7	36423.9	180826	615769	40220.2	727514	37740.9	34987.8	33761.1	160265	38686	33465	577855	33432.6	147778	132171	38680.5	171827	37105.9	829953
	TRUE		C H3 O2 P S2	Full match	No results	No results	Invalid mass	No results	-1.08	141.93105	12.531	785802.7313	1	0	0				No matches found	No matches found	No matches found	No matches found	No MS2	[M+H]+1	140937	75930.6	303760	115518	785803	101633	113392	118047	36303.5	87299.3	120229	132163	100564	121854	78050	86257.4	77814	98083.9	114205	114081	224323	108964	95527.8	130775	227466
	TRUE		C2 H5 N2 O2 P	Full match	No results	No results	No match	No results	1.77	120.00908	10.697	3684321.876	1	0	0				No matches found	No matches found	No matches found	No matches found	No MS2	[M+H]+1	355550	483573	781950	573782	694014	615077	566332	3.68432e+06	445817	850979	349317	632133	550906	612109	553214	598122	548501	558609	710801	659234	530611	540784	540984	631227	582915
	TRUE	1-Hexanal	C6 H12 O	Full match	No results	No results	Full match	Full match	-1.11	100.0887	13.967	676508.8194	192	0	0				No matches found	No matches found	No matches found	Single match found	DDA for preferred ion	[M+NH4]+1	251571	85089.4	63358	48342.5	60872.1	71797.9	150201	72884.1	39393.9	36250	51895	69090.2	74052.1	49528.3	75274.7	72888.6	52264.1	359490	74985.8	95014	46728	75032.5	46600.7	28513.4	62320.6
	TRUE	Triacetonamine	C9 H17 N O	Full match	No results	No results	Full match	No results	-0.39	155.13095	13.116	1982818.841	362	0	0				No matches found	No matches found	No matches found	No matches found	DDA for other ion	[M+H]+1	87868.9	61413.5	300150	104494	58600.3	69077.3	112616	1.41802e+06	63455.8	53056.7	93423.7	54935	107076	75636.4	101731	90194.3	134868	1.18689e+06	76316.9	84594.2	59144.9	112235	1.38327e+06	91357.4	105472
	TRUE	4-Benzylpiperidine	C12 H17 N	Full match	No results	No results	Full match	No results	-0.85	175.13595	12.655	1157093.299	272	0	0				No matches found	No matches found	No matches found	No matches found	No MS2	[M+H]+1	43069.7	56193	92743.1	52202.5	675378	957501	1.15709e+06	514194	51873.7	54604.6	44095.6	92733.2	471265	50993.7	166349	51282.2	104882	53333.5	50981.1	51910.5	47500.5	50138.7	103861	50718.7	54059
	TRUE	1,3-Dicyclohexylurea	C13 H24 N2 O	Full match	No results	No results	Full match	Full match	-0.89	224.18866	12.821	1008901.706	69	0	0				No matches found	No matches found	No matches found	Single match found	No MS2	[M+H]+1	1.0089e+06	46571.6	58377.7	56169	50077.7	70995.8	64995.7	55721.6	56132.7	108943	45381.5	36629.9	56391.7	153103	52748	55742.6	58662.2	219112	58585.7	815250	44237.7	52956.9	46888.9	53017.7	52783.5
	TRUE	THREO-SPHINGOSINE, (−)-	C18 H37 N O2	Full match	No results	No results	Full match	No results	-0.57	299.28226	3.62	531157.7979	53	0	0				No matches found	No matches found	No matches found	No matches found	DDA for other ion	[M+H]+1	98547.1	153696	78178.8	79311.9	199574	86452	531158	103041	94523.3	141708	104376	83757.1	132399	81934.2	41988	80504.2	73015.1	68717.1	81353.8	71145.7	118294	94554.4	95335.9	99349	96543.3
	TRUE	4-Chloropyrazole	C2 H3 N2 O P	Full match	No results	No results	No match	No results	2.28	101.99853	11.881	8573887.162	4	0	0				No matches found	No matches found	No matches found	No matches found	No MS2	[M+H]+1	663531	4.99593e+06	1.40558e+06	895862	1.31577e+06	8.57389e+06	615049	913738	1.07055e+06	1.21195e+06	959157	848253	279929	4.96372e+06	1.0745e+06	1.22773e+06	1.27629e+06	503543	1.05462e+06	1.24323e+06	853282	1.02891e+06	667903	457008	1.30312e+06
	TRUE	3,5-ditert-butyl-4-hydroxybenzonitrile	C15 H21 N O	Full match	No results	No results	Full match	No results	-0.66	231.16216	8.936	577412.5041	323	0	0				No matches found	No matches found	No matches found	No matches found	No MS2	[M+H]+1	32635.8	34094.6	31187.1	35776.9	38689.5	482707	29494	34043.5	28555.8	276424	33476.4	22832.5	31885.4	30277.8	32292.6	29789.2	33787.4	28392.1	27368.1	30473.1	33348.2	30393.1	100741	34900.8	419961
	TRUE	Quinuclidinol	C7 H13 N O	Full match	No results	No results	Full match	Full match	-1.28	127.09955	8.403	634729.8698	325	0	0				No matches found	No matches found	No matches found	Single match found	DDA for preferred ion	[M+NH4]+1	128434	47236.3	49853	29040.3	44380.3	45869.4	196335	40521.3	43485	41328.7	43234.1	45384	46973.5	634730	42991.4	49071.7	31221.5	43084.2	41110.5	45678.4	45693.8	31687.6	41781.7	48387.8	50651.3
	TRUE	4-Benzylpiperidine	C12 H17 N	Full match	No results	No results	Full match	No results	-1.34	175.13586	7.877	2929246.502	272	0	0				No matches found	No matches found	No matches found	No matches found	DDA for preferred ion	[M+H]+1	94648.8	105711	135094	47715.4	148934	85329.2	917463	230025	126981	112830	215551	50589.5	54255.9	50464.3	125841	54878.2	622096	128312	309190	77337.3	90923.5	50617.4	116921	1.42567e+06	256666
	TRUE	Dapabutan	C19 H40 N2 O2	Full match	No results	No results	Full match	No results	-0.6	328.30878	13.876	5435814.363	14	0	0				No matches found	No matches found	No matches found	No matches found	DDA for preferred ion	[M+H]+1	46457.2	125393	126385	400167	69653.5	5.43581e+06	125711	117021	311843	242482	156085	368918	403787	77383	229441	344571	345045	302861	492172	50327.3	460337	41037.1	276721	186569	129780
	TRUE	THREO-SPHINGOSINE, (−)-	C18 H37 N O2	Full match	No results	No results	Full match	No results	-0.52	299.28227	18.917	4669080.756	53	0	0				No matches found	No matches found	No matches found	No matches found	DDA for preferred ion	[M+H]+1	240401	245863	69852.7	4.00251e+06	4.66908e+06	3.88792e+06	237736	233963	226882	238018	69107.2	255887	911139	236456	250526	221750	247144	242600	220858	237039	295323	273856	258037	323158	429792
	TRUE	3,5-ditert-butyl-4-hydroxybenzonitrile	C15 H21 N O	Full match	No results	No results	Full match	No results	-0.98	231.16209	11.407	648988.6509	323	0	0				No matches found	No matches found	No matches found	No matches found	No MS2	[M+H]+1	22516.1	41932.5	17660.1	46442.9	24850.4	648989	13087.1	583922	155472	24571.5	21321.9	17115.9	21415.4	13139.7	373866	27326	23865.6	24923.7	24019.2	26586.9	28535.3	580775	13538.7	25390.7	27715.5
	TRUE		C H6 F P3 S3	Full match	No results	No results	Unused	No results	2.53	225.88342	7.581	898656.3492	2	0	0				No matches found	No matches found	No matches found	No matches found	No MS2	[M+H]+1	145089	150993	898656	864523	156641	187532	495352	242159	193441	403147	154708	196489	799084	127637	431349	164259	171509	199168	137676	90748.4	103442	122228	108521	163312	170077
	TRUE	Dibutyldiglycol	C12 H26 O3	Full match	No results	No results	Full match	No results	-0.73	218.18804	6.905	649219.8825	33	0	0				No matches found	No matches found	No matches found	No matches found	No MS2	[M+H]+1	649220	74865	48143.5	451912	52304.8	53625.6	143731	226768	40288.4	59853.9	45966.5	49222.4	120172	42361.1	45798.7	51982.3	481910	53912.5	46306.3	46865	47700	56105.7	41166.7	53179.9	45746.8
	TRUE	Decanamide	C10 H21 N O	Full match	No results	No results	Full match	No results	-1.57	171.16205	12.486	9611120.466	184	0	0				No matches found	No matches found	No matches found	No matches found	No MS2	[M+H]+1	343694	2.37538e+06	293206	1.68385e+06	370519	374113	443719	424717	2.87174e+06	9.61112e+06	419681	397341	419413	332828	344139	293290	316074	363039	3.39956e+06	397284	374874	1.98809e+06	395429	357808	9.24651e+06
	TRUE	Palmitamide	C16 H33 N O	Full match	No results	No results	Full match	No results	-0.44	255.2561	10.628	2549708.065	49	0	0				No matches found	No matches found	No matches found	No matches found	No MS2	[M+H]+1	130746	152832	169049	94050.6	1.19549e+06	106074	145605	653537	175718	146787	163418	157062	111942	126488	117832	106505	152424	107860	99604.3	178677	137556	120868	145751	55568.4	168425
	TRUE	3,5-ditert-butyl-4-hydroxybenzonitrile	C15 H21 N O	Full match	No results	No results	Full match	No results	-0.19	231.16227	14.743	624702.5591	323	0	0				No matches found	No matches found	No matches found	No matches found	No MS2	[M+H]+1	624703	28185.2	35078.1	34941.6	37507.9	35522.3	32687.4	35555.9	28914.9	34495.8	28041.5	24513.9	33742.1	25636.5	33595.4	35237.4	25520.3	35581.5	29739.3	30101.1	33471.2	34937.1	38611.8	264342	34750.6
	TRUE	Methylcyclohexylamine	C7 H15 N	Full match	No results	No results	Full match	No results	-1.41	113.12029	8.88	467965.7039	113	0	0				No matches found	No matches found	No matches found	No matches found	DDA for other ion	[M+H]+1	66020.8	66207.4	59218	73125.3	73946.3	236653	59121.2	86948	62202.2	66224.9	67176.3	66748	60447.2	61807.4	55278.7	61275.7	68650.5	62532.5	49632.4	68383.8	69373.7	59095.3	467966	50380.7	99756.5
	TRUE	1-(3-Aminopropyl)-2-pyrrolidone	C7 H14 N2 O	Full match	No results	No results	Full match	No results	-1.04	142.11047	9.405	824796.3552	260	0	0				No matches found	No matches found	No matches found	No matches found	No MS2	[M+H]+1	79519.2	42298.6	40636.4	41583	37878.7	43800.8	39831.9	45989.3	42432.2	39995.8	39049.2	39160.9	824796	40530.5	38858.8	43219.2	41220.7	43343.6	45415.6	49939	44016.1	32825.5	40004.2	40722.6	40487.9
	TRUE	N-tert-Butyl-α-phenylnitrone	C11 H15 N O	Full match	No results	No results	Full match	No results	-0.01	177.11536	13.071	3180304.457	725	0	0				No matches found	No matches found	No matches found	No matches found	No MS2	[M+H]+1	172148	253650	393963	654660	101769	144961	209866	205717	191724	155918	176682	242059	193212	169524	334112	219719	183954	129478	185571	169184	122494	2.70506e+06	135985	187792	193659
	TRUE	TAA	C9 H15 N	Full match	No results	No results	Full match	No results	-1.8	137.1202	6.859	18258255.76	154	0	0				No matches found	No matches found	No matches found	No matches found	DDA for other ion	[M+NH4]+1	45907.1	104680	46774.3	45519.7	54087.2	48119.2	46958.9	7.13543e+06	55167.2	65766	146947	58938.7	174129	41547.5	73248.5	52233.3	1.82583e+07	480242	4.11055e+06	35867.3	43742.8	53222	42937.3	52647.2	45397.8
	TRUE	2,2′-(Methylimino)diethanethiol	C5 H13 N S2	Full match	No results	No results	Full match	No results	0.03	151.04894	9.39	797489.1154	4	0	0				No matches found	No matches found	No matches found	No matches found	No MS2	[M+H]+1	46741.1	55691.6	53687.9	55253.9	53769	62310.1	255162	59047.3	59626.3	54341.2	112782	66854	60628.6	60034.5	252948	787728	54543	59084.6	61704.8	187915	58763.1	40657.8	54261.1	55539.2	797489
	TRUE		C2 H5 N2 O2 P	Full match	No results	No results	No match	No results	1.35	120.00903	9.411	11562380.27	1	0	0				No matches found	No matches found	No matches found	No matches found	No MS2	[M+H]+1	475323	6.40101e+06	782366	725191	657243	830646	746563	639240	670254	803529	657939	714745	654647	777798	827324	746435	691386	800545	666551	1.15624e+07	709215	636664	720533	800288	5.0524e+06
	TRUE	Laurylamine	C12 H27 N	Full match	No results	No results	Full match	No results	0.11	185.21437	10.444	878332.817	37	0	0				No matches found	No matches found	No matches found	No matches found	No MS2	[M+H]+1	34919.2	46667	46324.6	47177.8	70250.3	51845.9	39486.1	48089	878333	48927.1	83687.9	50924.2	61893.4	47713.1	259574	52001.4	40798.6	47896.6	48861.1	49562.3	37802.3	307207	102694	46862.1	65635.8
	TRUE	2-Acetamidobutanoic acid	C6 H11 N O3	Full match	No results	No results	Full match	No results	-0.68	145.07379	7.672	880587.4574	324	0	0				No matches found	No matches found	No matches found	No matches found	DDA for other ion	[M+H]+1	63698	88952.7	50700.3	48003	42102.9	33841.5	175659	49496.7	69872.7	92334.5	311129	46314.8	42936.3	41430.9	73665.4	47474.6	41067.5	777044	46833.6	53832.1	138289	31021.8	42775.4	252351	138700
	TRUE		C H3 O2 P S2	Full match	No results	No results	Invalid mass	No results	-1.39	141.93101	11.47	1803031.795	1	0	0				No matches found	No matches found	No matches found	No matches found	No MS2	[M+H]+1	86986.7	113874	62350.8	101569	116554	134997	1.31108e+06	205279	69549.4	93969.4	96177.5	82052.5	103043	90174.5	117366	1.80303e+06	116150	75497.9	65788.9	51844.9	90998.8	137300	97988.8	100326	76216.1
	TRUE	(3R,4R)-1-Benzyl-N,4-dimethylpiperidin-3-amine	C14 H22 N2	Full match	No results	No results	Full match	No results	-0.41	218.17821	11.414	582085.1588	158	0	0				No matches found	No matches found	No matches found	No matches found	No MS2	[M+H]+1	28358	30949.9	23802.4	41018.8	33410.2	582085	17638.8	183700	165298	34541.1	29426	30879.3	29184.4	18681	32833.2	36830.2	32410.5	33592.4	33449.1	35560.1	34096.6	339243	17776.4	34221.8	38324.2
	TRUE	1-cyclohexylpiperidin-4-one	C11 H19 N O	Full match	No results	No results	Full match	No results	0.15	181.14669	9.814	574678.444	208	0	0				No matches found	No matches found	No matches found	No matches found	DDA for other ion	[M+H]+1	38650	56297.3	80729.6	44233.4	42668.4	37652.3	45822.5	111128	42369.8	156966	144559	45769.7	158862	47155.6	42175.2	44377.8	30109.7	76557.4	90610.8	48915.7	47565.1	104903	25883.1	62980.2	44543.5
	TRUE	DIHYDROXYETHYL STEARAMINE OXIDE	C22 H47 N O3	Full match	No results	No results	Full match	No results	0.17	373.35566	15.978	4165995.161	4	0	0				No matches found	No matches found	No matches found	No matches found	DDA for preferred ion	[M+H]+1	232150	152187	240340	236625	234721	229525	227774	232511	177999	226431	229112	199624	225695	181370	227394	224818	193333	231058	203639	202555	224703	241712	231645	235144	217716
	TRUE	13-Hydroxyoctadecadienoic acid	C18 H32 O3	Full match	No results	No results	Full match	No results	-2.83	296.23431	24.822	3980092.583	122	0	0				No matches found	No matches found	No matches found	No matches found	No MS2	[M+H]+1	2.99933e+06	577202	1.10616e+06	566993	1.61509e+06	585860	566229	555751	559362	697786	570775	721213	583250	564387	1.22981e+06	657250	700106	620028	573336	610582	591887	608417	557742	900982	587321
	TRUE		C17 H46 N9 O P	Full match	No results	No results	Invalid mass	No results	-0.55	423.35606	24.635	42584923.58	2	0	0				No matches found	No matches found	No matches found	No matches found	DDA for preferred ion	[M+H]+1	728948	456034	879656	717168	750766	467517	248166	677631	1.95954e+07	625522	452546	746855	778097	7.67324e+06	494158	525773	1.86337e+06	614857	644394	671659	1.36027e+06	450605	687425	1.16895e+06	537975
	TRUE	3,5-ditert-butyl-4-hydroxybenzonitrile	C15 H21 N O	Full match	No results	No results	Full match	No results	-1.15	231.16205	8.876	647933.5712	323	0	0				No matches found	No matches found	No matches found	No matches found	No MS2	[M+H]+1	50681.4	49191.8	45459.2	56135.3	54361.8	317979	45278.4	647934	47750.1	50838.1	51568.4	51239.7	46402.8	47447	49307.1	46622	52700.2	48003.6	82585.8	135838	53255.4	45365	490166	289635	419961
	TRUE	N-Carbethoxypiperazine	C7 H14 N2 O2	Full match	No results	No results	Full match	No results	-0.58	158.10544	13.674	1765804.169	274	0	0				No matches found	No matches found	No matches found	No matches found	DDA for preferred ion	[M+H]+1	100223	132907	109424	118562	116710	756379	157602	190734	172666	128009	149443	127853	413457	101982	141516	116707	177287	389052	103170	139208	120794	123473	360729	1.7658e+06	145507
	TRUE	4-Benzylpiperidine	C12 H17 N	Full match	No results	No results	Full match	No results	-0.57	175.136	14.738	1195521.091	272	0	0				No matches found	No matches found	No matches found	No matches found	No MS2	[M+H]+1	1.19552e+06	56730.7	71725.7	70329.7	99634	72133.4	70664.6	71566.2	58199.3	69432.3	56441.3	55430.6	71359.8	498166	71443.2	70925.1	56842.6	71617.6	63208.5	60586.8	67370.2	70320.7	131684	70774.3	69945.2
	TRUE	3,3-Difluoroacrylonitrile	C3 H F2 N	Full match	No results	No results	Full match	No results	-0.88	89.00763	24.698	6303960.989	1	0	0				No matches found	No matches found	No matches found	No matches found	No MS2	[M+H]+1	462726	607496	422862	450736	532283	4.95189e+06	773478	697635	641026	5.52477e+06	406586	518908	549803	755639	807499	453389	693373	648497	561641	629065	449464	529673	421620	721748	6.30396e+06
	TRUE		C2 H5 N2 O2 P	Full match	No results	No results	No match	No results	0.9	120.00897	9.817	9220159.542	1	0	0				No matches found	No matches found	No matches found	No matches found	No MS2	[M+H]+1	294507	685539	2.54057e+06	517516	285513	390867	528101	545714	5.05375e+06	434371	445129	438621	415096	414064	485744	371501	330670	522974	351079	506714	2.30521e+06	441061	408365	362779	400337
	TRUE	4-Benzylpiperidine	C12 H17 N	Full match	No results	No results	Full match	No results	-1.11	175.1359	7.655	1961667.866	272	0	0				No matches found	No matches found	No matches found	No matches found	No MS2	[M+H]+1	920640	1.32662e+06	527435	813384	108108	276879	86156.9	131763	959443	291545	1.09749e+06	58403.6	621860	46070	715946	205564	37676.5	1.25396e+06	470533	999296	570578	103296	429129	38666.7	1.35143e+06
	TRUE	methylpiperazine	C5 H12 N2	Full match	No results	No results	Full match	No results	-1.6	100.09989	8.808	598242.47	89	0	0				No matches found	No matches found	No matches found	No matches found	DDA for preferred ion	[M+H]+1	38776.3	42235.1	41410.7	43458.6	42627.4	41620.5	40862.3	598242	43164.4	44083.7	45515.5	31750.7	41198.3	41383.9	37101.2	42012.5	45300.1	45092.3	35471.9	34046.9	45677.3	40194.1	43934.2	50148.3	41241.9
	TRUE	3,3-Difluoroacrylonitrile	C3 H F2 N	Full match	No results	No results	Full match	No results	-1.09	89.00761	24.733	6303960.989	1	0	0				No matches found	No matches found	No matches found	No matches found	No MS2	[M+H]+1	561777	386418	353461	614760	409061	583060	460559	427823	495429	618238	336321	635712	694593	372479	342431	485490	353359	378275	498419	345167	460002	343770	625889	428167	6.30396e+06
	TRUE	(±)-Dihydrojasmonic Acid	C12 H20 O3	Invalid mass	No results	No results	Invalid mass	No results	-3.84	212.14043	24.547	8535957.242	458	0	0				No matches found	No matches found	No matches found	No matches found	No MS2	[M+H]+1	581138	689245	2.06577e+06	1.01692e+06	592984	616172	562186	1.0646e+06	321230	1.06315e+06	575572	670832	796273	569776	601063	619829	625882	606682	589718	693080	761930	687698	874193	590582	509907
	TRUE	Ethyl 2-oxocyclohexanecarboxylate	C9 H14 O3	Full match	No results	No results	Full match	No results	-0.4	170.09423	24.742	4268769.836	668	0	0				No matches found	No matches found	No matches found	No matches found	No MS2	[M+H]+1	264720	528940	695333	489464	3.96433e+06	382849	480723	1.2507e+06	883268	561034	484993	428062	339605	3.24054e+06	427210	500730	2.44269e+06	515232	601865	618729	531915	630505	1.07487e+06	491546	1.55072e+06
	TRUE	1-Ethynylcyclohexanol	C8 H12 O	Full match	No results	No results	Full match	No results	-0.96	124.0887	24.796	13790631.22	487	0	0				No matches found	No matches found	No matches found	No matches found	No MS2	[M+H]+1	586012	3.78424e+06	577759	618411	4.07388e+06	628937	610429	580014	547242	1.37906e+07	5.37036e+06	567139	723021	619081	636881	1.76611e+06	605618	597910	1.76653e+06	589852	2.83613e+06	605751	622068	619325	656798
	TRUE	1-(3-Aminopropyl)-2-pyrrolidone	C7 H14 N2 O	Full match	No results	No results	Full match	No results	-1.58	142.11039	7.633	1241208.303	260	0	0				No matches found	No matches found	No matches found	No matches found	No MS2	[M+H]+1	355566	36025.4	38434.6	40483.7	72676.4	78753.5	32897.4	1.24121e+06	30259.5	1.20945e+06	458846	34265.7	31207.4	30661.3	48072.4	139360	31892.8	35653.6	29595.3	31174.2	643447	30603.8	50476.8	33143.4	31098.8
	TRUE	(9Z)-9-Octadecenamide	C18 H35 N O	Full match	No results	No results	Full match	No results	-0.23	281.2718	24.814	17598770.57	56	0	0				No matches found	No matches found	No matches found	No matches found	No MS2	[M+H]+1	585041	4.92897e+06	591281	602218	607999	2.62879e+06	587155	570235	441391	591420	585652	7.24834e+06	570684	602869	605508	596554	840769	779716	588279	626496	615959	607979	605778	1.71538e+06	599806
	TRUE	Butoxytriglycol	C10 H22 O4	Full match	No results	No results	Full match	No results	-2.08	206.15138	6.884	1073085.914	31	0	0				No matches found	No matches found	No matches found	No matches found	No MS2	[M+H]+1	652232	203781	41380.5	176119	43227.7	47132.8	45578.5	171651	39981.2	44210.7	39904.7	42023.4	39911.3	36112.2	40580.2	48201.1	188680	48791.9	136450	40470.5	41422.5	47223.2	37051.4	46196.8	41029.3
	TRUE		C2 H5 N2 O2 P	Full match	No results	No results	No match	No results	1.56	120.00905	13.096	5184957.668	1	0	0				No matches found	No matches found	No matches found	No matches found	No MS2	[M+H]+1	388469	1.41882e+06	494100	287573	489308	640129	543099	441098	491684	509067	5.18496e+06	438270	546019	367120	530266	580385	517724	581410	569038	368753	1.34471e+06	451275	525997	403626	528229
	TRUE	3,3-Difluoroacrylonitrile	C3 H F2 N	Full match	No results	No results	Full match	No results	-0.82	89.00763	24.462	8056120.487	1	0	0				No matches found	No matches found	No matches found	No matches found	No MS2	[M+H]+1	801558	1.37932e+06	6.80331e+06	4.11317e+06	742543	946821	5.07425e+06	1.22693e+06	705975	650681	1.10327e+06	1.06918e+06	980141	5.93119e+06	1.13754e+06	1.0933e+06	1.20009e+06	1.12807e+06	1.14453e+06	787226	1.26005e+06	7.07931e+06	1.00568e+06	1.00943e+06	634712
	TRUE	Glaurin	C16 H32 O4	Full match	No results	No results	Full match	No results	0.85	288.2303	12.686	656425.6774	46	0	0				No matches found	No matches found	No matches found	No matches found	No MS2	[M+H]+1	41767.9	44880.4	53639.5	46692.1	190534	283570	656426	51979	49965.1	49426.9	43569.5	38551.1	222600	49148.9	48824.9	48019.1	53813.6	48836.7	48881.8	49494.6	40043.4	46354	52448.4	47570.8	49277
	TRUE	Fluoroiodomethane	C H2 F I	Full match	No results	No results	Full match	No results	-2.97	159.91805	24.97	7274701.008	1	0	0				No matches found	No matches found	No matches found	No matches found	No MS2	[M+ACN+H]+1	542953	608214	6.46963e+06	659373	895315	5.96683e+06	688287	757570	6.10218e+06	826498	1.05465e+06	715238	5.31896e+06	7.05799e+06	460721	5.92565e+06	464918	254774	664207	762810	632826	634635	1.30606e+06	7.15295e+06	7.2747e+06
	TRUE	Isovalerylglycine	C7 H13 N O3	Full match	No results	No results	Full match	No results	-0.03	159.08954	5.799	1381314.623	361	0	0				No matches found	No matches found	No matches found	No matches found	DDA for other ion	[M+H]+1	298263	46824.2	49343	46219.3	95657.7	137698	590500	45613.4	45083.8	45752.2	43051	46567.7	34150.3	46016.4	46306.4	47551.4	73203	27146.2	43951.6	44541.5	46825.6	46617.5	46641.4	48732.4	59997.7
	TRUE	4-Phenylcyclohexanone	C12 H14 O	Full match	No results	No results	Full match	No results	-1.74	174.10416	7.566	2758786.028	442	0	0				No matches found	No matches found	No matches found	No matches found	DDA for preferred ion	[M+H]+1	2.75879e+06	319275	626105	244978	196083	1.63718e+06	258797	425792	241989	462864	288009	296235	249395	216458	854718	302287	203382	302145	220846	263464	230674	246845	495947	217390	250223
	TRUE	DL-Carnitine	C7 H15 N O3	Full match	No results	No results	Full match	No results	-0.69	161.10508	1.589	1140309.389	151	0	0				No matches found	No matches found	No matches found	No matches found	DDA for preferred ion	[M+H]+1	307761	433437	901269	68177.1	85989	55404.2	113737	113183	70243.1	535230	420670	1.14031e+06	66273.3	157301	148965	416356	393873	289336	614622	100739	1.0479e+06	50866.6	83280.3	99336.7	406225
	TRUE	Ethyl 2-oxocyclohexanecarboxylate	C9 H14 O3	Full match	No results	No results	Full match	No results	-0.02	170.09429	24.712	4268769.836	668	0	0				No matches found	No matches found	No matches found	No matches found	No MS2	[M+H]+1	579700	880684	562386	648041	3.96433e+06	382849	580538	503533	672772	413449	579876	509168	339605	3.24054e+06	427210	507650	561257	537104	3.97242e+06	618729	597671	630505	254493	506520	475963
	TRUE	Valproic acid	C8 H16 O2	Full match	No results	No results	Full match	Full match	-1.05	144.11488	6.92	1457648.798	472	0	0				No matches found	No matches found	No matches found	Single match found	No MS2	[M+H]+1	82448.1	522613	53411.9	620495	104567	58445.5	39146.6	91021.2	48348.1	63262.3	50876.2	78583.4	159737	180811	52200.5	49209	1.219e+06	95872.7	72316.3	50294.2	294412	70855.2	174096	62951.6	51946.6
	TRUE		C2 H2 F N2 P S4	Full match	No results	No results	Invalid mass	No results	2.15	231.88274	13.089	1290717.739	2	0	0				No matches found	No matches found	No matches found	No matches found	No MS2	[M+H]+1	107271	155743	466450	287450	571852	104603	104877	128510	1.08025e+06	89593.8	861322	1.29072e+06	168615	111147	167071	132676	124032	130333	74969.7	89201.5	26636.5	99721.1	110196	70594.5	131700
	TRUE	Linoelaidic Acid	C18 H32 O2	Full match	No results	No results	Full match	No results	0.29	280.24031	24.715	7430428.806	202	0	0				No matches found	No matches found	No matches found	No matches found	No MS2	[M+H]+1	2.23339e+06	3.86122e+06	936059	941333	937963	941288	904906	940842	911431	893583	922391	888545	926474	910527	2.56423e+06	885898	430806	649834	918385	693885	913319	896172	1.45177e+06	937074	868955
	TRUE	1-(3,7,11,15-Tetramethylhexadecanoyl)pyrrolidine	C24 H47 N O	Full match	No results	No results	Full match	No results	0.29	365.36587	22.075	4884568.933	14	0	0				No matches found	No matches found	No matches found	No matches found	DDA for preferred ion	[M+H]+1	291101	304736	293581	3.86008e+06	4.88457e+06	4.0772e+06	299511	293957	310949	284149	287459	304602	308957	294438	302136	2.68578e+06	1.29247e+06	1.51494e+06	288709	292652	289155	288743	287821	302650	320858
	TRUE	4-Benzylpiperidine	C12 H17 N	Full match	No results	No results	Full match	No results	-0.6	175.13599	15.229	823249.4696	272	0	0				No matches found	No matches found	No matches found	No matches found	No MS2	[M+H]+1	61606.1	44576.5	59609.2	60861.4	307223	67131.1	65382.9	61258.2	41199.7	76971.8	43362.2	36212.6	61096.3	44573.4	63380.1	62561.4	53924.6	60727	54852.6	519325	59466.1	64871.6	68885.4	63570.3	61855.8
	TRUE	(9Z)-9-Octadecenamide	C18 H35 N O	Full match	No results	No results	Full match	No results	-0.45	281.27174	24.626	7248344.127	56	0	0				No matches found	No matches found	No matches found	No matches found	No MS2	[M+H]+1	1.22146e+06	484585	502186	476428	1.05495e+06	3.04134e+06	586498	250960	611900	771493	469539	7.24834e+06	477848	619660	691737	495215	501576	524416	468015	553383	463869	3.26877e+06	460189	424038	474137
	TRUE	racephedrine	C10 H15 N O	Full match	No results	No results	Full match	No results	-0.57	165.11527	7.59	683483.3989	584	0	0				No matches found	No matches found	No matches found	No matches found	No MS2	[M+H]+1	46592.9	45287.5	238181	92928.3	47563.7	54950.6	65465.9	190490	49077.8	683483	50177.3	49504.6	46745.9	58305	240315	80950.2	47640.6	51278.6	44618.7	50138.3	61657.5	38910.9	172470	60960.9	160587
	TRUE	Butoxytriglycol	C10 H22 O4	Full match	No results	No results	Full match	No results	-1.14	206.15158	12.674	1365438.963	31	0	0				No matches found	No matches found	No matches found	No matches found	No MS2	[M+H]+1	34048.3	40561.9	53110.2	48683.4	393796	288769	1.36544e+06	51379	49177.9	48480.3	39822	37375.6	51967.1	40156.2	46242.7	46794.3	50251.9	46997.2	49118.9	48386.3	39146.8	43953.9	51274	47569.6	48173.6
	TRUE	N,N-dimethylaminopropyl acrylamide	C8 H16 N2 O	Full match	No results	No results	Full match	No results	-0.16	156.12624	9.622	509267.1115	263	0	0				No matches found	No matches found	No matches found	No matches found	No MS2	[M+H]+1	46274.4	39239.5	47629.2	49452.2	45830.6	44081.8	40485.1	37876.1	46560	43631.3	42780.9	65924.9	50455.3	48728.9	43141	44638.4	43507.2	41544.5	41563.5	46913.8	42561.5	45850	48673.3	84570.3	44694.5
	TRUE	C12E3	C18 H38 O4	Full match	No results	No results	Full match	No results	-0.43	318.27687	24.88	8798536.719	10	0	0				No matches found	No matches found	No matches found	No matches found	No MS2	[M+H]+1	754441	1.2976e+06	773949	721806	760913	1.69605e+06	527321	713477	750334	748750	767355	366290	749460	745731	792053	697724	731983	739840	740966	8.79854e+06	744643	740933	750270	8.04647e+06	771551
	TRUE	(Vinylsilyl)methanol	C3 H8 O Si	Full match	No results	No results	Full match	No results	-2.22	88.03425	0.335	3792261.521	2	0	0				No matches found	No matches found	No matches found	No matches found	DDA for other ion	[M+H]+1	558863	726607	620880	575825	1.32799e+06	974209	597544	1.11774e+06	597258	1.15804e+06	3.79226e+06	584922	664132	762026	399654	560578	426554	1.32347e+06	535566	750552	598364	561887	585371	1.07491e+06	1.20129e+06
	TRUE	Ethyl 2-oxocyclohexanecarboxylate	C9 H14 O3	Full match	No results	No results	Full match	No results	-1.01	170.09412	24.794	4268769.836	668	0	0				No matches found	No matches found	No matches found	No matches found	No MS2	[M+H]+1	376312	974566	530146	567448	3.96433e+06	965386	562751	532215	861848	531975	1.03007e+06	524037	1.88911e+06	3.24054e+06	427210	532415	2.44269e+06	548636	538410	351669	630728	786025	570803	940612	1.55072e+06
	TRUE	4-Benzylpiperidine	C12 H17 N	Full match	No results	No results	Full match	No results	-1.5	175.13584	10.242	944871.2192	272	0	0				No matches found	No matches found	No matches found	No matches found	No MS2	[M+H]+1	43038.7	40865.8	35097.4	105857	944871	44484.4	49215.5	41194.8	25070	53287.4	439246	46709.5	44633.1	41825.8	39351.5	40139.2	46336.9	36987.4	46046.5	41610.7	40702.8	41858.4	41352.4	40554.3	41304.1
	TRUE	Lauramine	C12 H25 N O	Full match	No results	No results	Full match	No results	-0.84	199.19345	13.269	1800557.841	97	0	0				No matches found	No matches found	No matches found	No matches found	No MS2	[M+H]+1	55343.2	163856	73874.4	96572	367744	92628	842142	70949.2	98590	99608.6	62596.6	533058	68031.7	53963.6	76745.1	70091.1	425023	393063	66454.9	71433.6	61479.3	242453	81461.8	59113.6	78641.8
	TRUE	Stearyldiethanolamine	C22 H47 N O2	Full match	No results	No results	Full match	No results	-0.14	357.36063	15.507	2400905.607	4	0	0				No matches found	No matches found	No matches found	No matches found	DDA for preferred ion	[M+H]+1	208959	115547	299715	225769	178637	421344	205868	334998	212611	288266	117184	322587	284453	159847	164216	323756	189844	282551	370898	280168	382221	156091	445470	254268	211420
	TRUE		C3 H10 F2 N4 O2	Full match	No results	No results	No results	No results	2.16	172.07755	12.515	534357.5402	38	0	0				No matches found	No matches found	No matches found	No matches found	DDA for preferred ion	[M+H]+1	52103.1	65119.1	497498	59331.7	238325	107730	36419.7	58252.3	54737.7	55995.2	45167.3	43293.5	53513.8	38830.6	59197.1	55128.7	55435.9	54809.7	96763.5	124343	44823.9	47673.6	39344	55111.2	55671.9
	TRUE		C15 H40 N9 O4 P	Full match	No results	No results	Invalid mass	No results	-1.57	441.2934	24.921	2233202.417	1	0	0				No matches found	No matches found	No matches found	No matches found	No MS2	[M+H]+1	412089	403573	582777	2.2332e+06	404037	510596	383272	405223	389998	692678	399778	401301	414352	441891	413146	1.09544e+06	427595	404055	401332	395195	409409	414947	563089	784936	413200
	TRUE		C H3 O2 P S2	Full match	No results	No results	No match	No results	-0.54	141.93113	10.988	2007476.498	1	0	0				No matches found	No matches found	No matches found	No matches found	No MS2	[M+H]+1	1.03255e+06	98017.8	129932	81634.9	107750	1.23614e+06	2.00748e+06	108088	110808	88719.3	84555.2	291119	126715	134077	112811	174298	120906	137220	155422	115950	97081.2	116443	257534	129545	113401
	TRUE	(3R,4R)-1-Benzyl-N,4-dimethylpiperidin-3-amine	C14 H22 N2	Full match	No results	No results	Full match	No results	-0.62	218.17816	13.663	327584.0969	158	0	0				No matches found	No matches found	No matches found	No matches found	No MS2	[M+H]+1	25014.6	26493.1	30617.8	33688.1	21789.7	327584	32839	32776.2	28379.5	29728	27136.6	25018.6	208330	21505.2	30137.7	30355.1	29970.1	30165.9	30677.4	22596.3	17695.6	31856.1	131115	32814.3	31356.5
	TRUE	4-Benzylpiperidine	C12 H17 N	Full match	No results	No results	Full match	No results	-0.97	175.13593	11.6	897904.1462	272	0	0				No matches found	No matches found	No matches found	No matches found	No MS2	[M+H]+1	487507	43232.2	41828.1	66461.7	57793.7	97699	45841.1	41424.6	62701.1	80327.8	45911.5	36096.1	50794	176803	95701	55628.8	66097.1	56191.1	56661.7	56796.7	38796.4	82101.3	33130.7	55394.1	38989.2
	TRUE		C H3 O2 P S2	Full match	No results	No results	Invalid mass	No results	-1.09	141.93105	14.031	535754.5479	1	0	0				No matches found	No matches found	No matches found	No matches found	No MS2	[M+H]+1	35305.5	54646.3	61307.1	59279.5	41426.9	60056.6	62206.4	60590.7	36636.6	60320.7	55794.8	61927.4	56999.4	40891.3	60789.9	148192	59372.6	404792	61477	46555.6	39104	39445.5	160197	131244	61521.4
	TRUE	C12E3	C18 H38 O4	Full match	No results	No results	Full match	No results	-0.32	318.27691	24.867	8798536.719	10	0	0				No matches found	No matches found	No matches found	No matches found	No MS2	[M+H]+1	598185	823720	420714	419858	493710	1.69605e+06	412165	416460	595242	540191	446596	443931	486672	434011	792053	1.51018e+06	422463	422264	431238	8.79854e+06	471098	476024	435004	8.04647e+06	449038
	TRUE		C H N3 O4 S3	Invalid mass	No results	No results	No match	No results	3.09	214.91358	24.671	6479911.821	15	0	0				No matches found	No matches found	No matches found	No matches found	No MS2	[M+H]+1	510586	528502	520866	508220	647442	507867	496308	496378	499085	498315	495871	387381	250444	583221	373745	516132	523956	549438	522796	920846	496688	984554	520450	520649	480798
	TRUE	1-Boc-3-oxopiperazine	C9 H16 N2 O3	Full match	No results	No results	Full match	No results	-1.66	200.11576	7.831	995111.6902	144	0	0				No matches found	No matches found	No matches found	No matches found	DDA for preferred ion	[M+H]+1	28879.8	61130.9	66116.9	50832.8	124212	62896.4	60739.7	143601	490178	65065.4	34151.5	61479.3	62385.1	57171.1	134466	64031.9	63420.6	35184.5	91607.5	61865.2	60360.2	58586.2	64462.8	521322	98622.4
	TRUE	(9Z)-9-Octadecenamide	C18 H35 N O	Full match	No results	No results	Full match	No results	-0.78	281.27164	24.7	7248344.127	56	0	0				No matches found	No matches found	No matches found	No matches found	No MS2	[M+H]+1	1.37397e+06	4.92897e+06	2.80473e+06	478272	514684	3.04134e+06	506242	474240	345417	469696	608075	7.24834e+06	439688	502587	550948	496568	575875	260759	612298	508425	535847	502327	493919	638518	465572
	TRUE	3,5-DIMETHYLPYRAZOL-1-METHANOL	C6 H10 N2 O	Full match	No results	No results	Full match	No results	-0.7	126.07922	11.43	599300.1642	187	0	0				No matches found	No matches found	No matches found	No matches found	DDA for preferred ion	[M+H]+1	68508.6	98482.5	45866	28585.6	44148.2	33573.6	57895.8	57323.3	95455	70394	75927.8	61345.8	61097.3	88214.2	207412	105294	66189.1	75216.7	67736.5	599300	71294	74987.2	27894.9	69155.8	114583
	TRUE	Isophorone	C9 H14 O	Full match	No results	No results	Full match	Full match	-0.75	138.10436	24.596	2287124.969	683	0	0				No matches found	No matches found	No matches found	Single match found	No MS2	[M+H]+1	358983	599504	418549	210737	380917	357683	317941	383212	361128	371238	1.70795e+06	673779	383124	413044	332176	394463	364263	403124	360678	375123	384730	1.47971e+06	954869	445231	604068
	TRUE	1,2-Oxazole-4,5-dicarbonitrile	C5 H N3 O	Full match	No results	No results	Full match	No results	2.86	119.0123	13.095	8402671.29	2	0	0				No matches found	No matches found	No matches found	No matches found	No MS2	[M+H]+1	370578	430147	453389	311622	392762	575219	541550	538075	536227	488844	596713	459195	465168	5.01193e+06	8.40267e+06	482123	655951	493928	512443	395658	330130	541793	447608	402749	601871
	TRUE	N,N-dimethylaminopropyl acrylamide	C8 H16 N2 O	Full match	No results	No results	Full match	No results	-1.05	156.1261	9.771	917993.2817	263	0	0				No matches found	No matches found	No matches found	No matches found	No MS2	[M+H]+1	77869.1	455886	42340.8	42347.8	32945.2	36691.4	39274.6	42761.4	40483	38435.2	37135.1	42506.9	43817	40925.9	37164.2	43507.3	498892	36333.1	38341.7	37367.2	40073.7	105368	35789.4	117936	40183.9
	TRUE	Glaurin	C16 H32 O4	Full match	No results	No results	Full match	No results	1.17	288.2304	13.981	406705.8397	46	0	0				No matches found	No matches found	No matches found	No matches found	No MS2	[M+H]+1	32695.3	39344.5	45578.9	44394.9	32100.7	43581.5	47109.1	45881.5	44036.8	46694.8	40357.2	46785	43512.5	30095.7	47386.4	48183.6	47359.9	239675	47204.5	34503.5	28600.5	47124.8	42628.8	35219	44044.5
	TRUE	Amide C22	C22 H45 N O	Full match	No results	No results	Full match	No results	0.28	339.35021	23.688	6029563.628	25	0	0				No matches found	No matches found	No matches found	No matches found	DDA for preferred ion	[M+H]+1	469999	388273	487616	1.10799e+06	638510	6.02956e+06	993787	667736	616023	284156	447041	481284	532517	498254	385047	363529	449049	368218	630372	878394	489175	719608	539473	532631	619920
	TRUE	Amide C18	C18 H37 N O	Full match	No results	No results	Full match	No results	-0.6	283.28735	10.472	326904.6584	43	0	0				No matches found	No matches found	No matches found	No matches found	No MS2	[M+H]+1	31653	44758	48263.8	46947.1	51472.2	76136.2	82306.3	43930.5	49529.8	46108.8	51527.7	47674.3	44898.5	45629	44224	48066.9	83355.1	44636.3	46167.3	46222.8	27062.3	47235.2	47509.3	45847	46643.7
	TRUE	(3R,4R)-1-Benzyl-N,4-dimethylpiperidin-3-amine	C14 H22 N2	Full match	No results	No results	Full match	No results	-0.84	218.17812	8.756	529917.3632	158	0	0				No matches found	No matches found	No matches found	No matches found	No MS2	[M+H]+1	46547.9	36217.8	34423	34315	32030.2	35846.2	32940.1	33581.1	35980.6	37559.4	39607.5	38840.3	34618.2	32686.5	529917	35738.6	38489.6	35628	28517.5	38433.2	24973.7	35135.3	37632.1	217990	106724
	TRUE	(9Z)-9-Octadecenamide	C18 H35 N O	Full match	No results	No results	Full match	No results	-0.69	281.27167	24.542	3070392.807	56	0	0				No matches found	No matches found	No matches found	No matches found	No MS2	[M+H]+1	743572	378304	357519	342192	499354	380038	449644	360236	353234	845692	354997	363661	371005	351422	370719	382294	386258	260759	363722	400021	375846	371995	363220	800999	360022
	TRUE	1,3-Dicyclohexylurea	C13 H24 N2 O	Full match	No results	No results	Full match	Full match	-0.5	224.18875	9.472	1465578.524	69	0	0				No matches found	No matches found	No matches found	Single match found	DDA for preferred ion	[M+H]+1	39938.6	36643.4	41707.6	45811	33467	39388.5	37674.5	39225.5	41064.3	37080.7	36349.7	36152.8	1.46558e+06	371247	36852.9	38231.3	238290	39982	37379.7	43013.5	41845.4	41195.5	38031.1	37642.2	217093
	TRUE	4-Benzylpiperidine	C12 H17 N	Full match	No results	No results	Full match	No results	-0.73	175.13597	11.809	587836.5552	272	0	0				No matches found	No matches found	No matches found	No matches found	No MS2	[M+H]+1	45936.7	42890.8	31864.7	44701.7	587837	121679	36156.6	43739.2	50552.8	49366.6	38520.1	118230	279074	112991	45402.3	65059.7	87732.5	50484.1	50440.1	53085.9	33476.4	42657.7	32798.9	50929	50536.3
	TRUE	Diethylene glycol	C4 H10 O3	Full match	No results	No results	Full match	No results	-0.51	106.06294	24.842	8180965.911	25	0	0				No matches found	No matches found	No matches found	No matches found	No MS2	[M+H]+1	786753	774046	741894	994848	1.08938e+06	1.64056e+06	759251	714072	763400	753434	2.42188e+06	5.1618e+06	753706	721990	497658	728324	796449	759805	726127	837312	757169	801877	1.19912e+06	783530	349848
	TRUE		C H F2 N O S2	Full match	No results	No results	No match	No results	2.3	144.94709	24.781	5858158.036	1	0	0				No matches found	No matches found	No matches found	No matches found	No MS2	[M+H]+1	1.03257e+06	515479	380989	613237	951329	633253	551621	583537	570022	5.85816e+06	603309	575021	579491	569726	1.97606e+06	564964	984579	602584	593281	1.56811e+06	596743	482001	625501	1.90867e+06	374268
	TRUE	DL-Lactic Acid	C3 H6 O3	Full match	No results	No results	Full match	No results	-1.14	90.03159	24.685	12874453.35	34	0	0				No matches found	No matches found	No matches found	No matches found	No MS2	[M+H]+1	269796	278268	510296	432248	480220	273242	352781	438281	388635	1.51785e+06	507291	271837	397028	277435	413479	335815	1.07205e+06	514328	4.96979e+06	346860	275967	396388	283137	549187	261412
	TRUE	(9Z)-9-Octadecenamide	C18 H35 N O	Full match	No results	No results	Full match	No results	-0.33	281.27177	24.735	17598770.57	56	0	0				No matches found	No matches found	No matches found	No matches found	No MS2	[M+H]+1	1.37397e+06	4.92897e+06	2.80473e+06	394154	540952	3.04134e+06	441130	268715	582030	437130	459012	7.24834e+06	483208	455222	468277	429814	313601	1.0578e+06	484911	444577	468438	445354	465269	1.71538e+06	425082
	TRUE		C5 H12 N4 O Si	Full match	No results	No results	No match	No results	-0.43	172.07796	13.262	835662.0617	18	0	0				No matches found	No matches found	No matches found	No matches found	DDA for preferred ion	[M+H]+1	66487.6	58962.9	835662	132610	52951.8	73753.9	70760.1	184567	319634	70178.4	63412.1	183570	68918.1	57219.7	317305	71004.3	422652	70929.4	71994.2	65179.8	106988	78505.7	69426.3	68647	92304.8
	TRUE		C18 H42 N4 O P2	Full match	No results	No results	Invalid mass	No results	2.86	392.28451	20.583	6018978.539	12	0	0				No matches found	No matches found	No matches found	No matches found	DDA for preferred ion	[M+H]+1	526558	581379	6.01898e+06	119970	119419	117270	122948	124417	112004	125171	129341	120141	122093	117417	114475	105871	124963	367236	122205	119461	109804	115765	123254	115827	123881
	TRUE	1-(3-Aminopropyl)-2-pyrrolidone	C7 H14 N2 O	Full match	No results	No results	Full match	No results	-0.59	142.11053	12.816	795280.5018	260	0	0				No matches found	No matches found	No matches found	No matches found	No MS2	[M+H]+1	245108	35105.4	41476.2	37605.8	82340.4	35405.9	46985.8	37306.2	34545.2	36164.3	30383.4	23717.9	37754.9	32686.1	35200.4	33990.7	38013.5	35531.7	39027.7	795281	25286.1	33117.1	38079.8	34777.7	35339.1
	TRUE	Cyclopentane	C5 H10	Full match	No results	No results	Full match	Full match	-1.52	70.07814	7.508	737107.4783	16	0	0				No matches found	No matches found	No matches found	Single match found	No MS2	[M+H]+1	95993.7	71877.7	93391.3	91850.3	23457.8	174931	75045.7	73267	37674.1	67454.7	97562.3	72570.5	77091.1	75676.9	86325.3	74598.4	76220.9	49311.6	215748	74415.9	87421.4	94073.7	248707	76622.5	87641
	TRUE	(3R,4R)-1-Benzyl-N,4-dimethylpiperidin-3-amine	C14 H22 N2	Full match	No results	No results	Full match	No results	-0.39	218.17821	10.467	292773.767	158	0	0				No matches found	No matches found	No matches found	No matches found	No MS2	[M+H]+1	22329.2	30063.6	22574.2	29061.5	35267.8	24116.5	27403.8	29507.8	291453	29295.7	32787.8	32022.5	29466	31228.7	28952.7	32286.1	28386.3	29981.9	31010.2	31047.5	18177.6	31228.5	60912.3	30795.1	31330.2
	TRUE	Butyrophenone	C10 H12 O	Full match	No results	No results	Full match	No results	-1.39	148.08861	25.248	1688452.615	357	0	0				No matches found	No matches found	No matches found	No matches found	No MS2	[M+H]+1	125344	118016	76673.4	66774.1	121240	123212	98804.7	790099	126673	138301	667031	135889	125504	1.61603e+06	126936	823385	126723	131084	138836	123006	147723	133080	90775.7	131613	120779
	TRUE	Isoniazid	C6 H7 N3 O	Full match	No results	No results	Full match	No results	2.82	137.0593	24.466	4137739.902	122	0	0				No matches found	No matches found	No matches found	No matches found	No MS2	[M+2H]+2	463233	2.31962e+06	855393	471663	3.07364e+06	3.92518e+06	1.56466e+06	469289	456342	3.54715e+06	513252	305083	1.02976e+06	1.24744e+06	184560	1.21565e+06	665199	928032	1.36148e+06	500692	2.25215e+06	197525	472553	2.30456e+06	641617
	TRUE	Mesitol	C9 H12 O	Full match	No results	No results	Full match	No results	-0.69	136.08872	24.716	6126598.039	379	0	0				No matches found	No matches found	No matches found	No matches found	No MS2	[M+H]+1	802500	797511	4.75476e+06	792847	817840	3.39522e+06	1.73245e+06	3.33091e+06	784668	779144	776601	6.1266e+06	758931	793918	812288	772443	854011	852620	800770	4.70879e+06	1.31588e+06	5.91151e+06	837116	817065	927036
	TRUE		C H6 N P S3	Full match	No results	No results	Invalid mass	No results	1.32	158.94021	25.144	9968016.824	1	0	0				No matches found	No matches found	No matches found	No matches found	DDA for other ion	[M+NH4]+1	655177	657218	932040	427066	957516	592524	204269	551665	363815	380780	629384	9.96802e+06	581540	719733	713619	594660	1.0631e+06	445948	693788	490595	1.25133e+06	266955	777902	1.3568e+06	644088
	TRUE	methylpiperazine	C5 H12 N2	Full match	No results	No results	Full match	No results	-1.21	100.09993	9.471	375361.1711	89	0	0				No matches found	No matches found	No matches found	No matches found	DDA for preferred ion	[M+H]+1	43164.5	43598.3	45076.3	49511.1	36170.1	42569.9	40717.5	42393.8	44381.1	40075.7	39285.7	39072.9	99261.1	46898.7	39829.6	41319.3	94758.4	43211.3	40398.9	46487.7	45225.3	44522.9	41102.8	40682.6	42362.3
	TRUE	1-Cyclohexenecarboxylic Acid	C7 H10 O2	Full match	No results	No results	Full match	No results	-1.32	126.06791	24.642	3798604.074	470	0	0				No matches found	No matches found	No matches found	No matches found	No MS2	[M+H]+1	429420	469630	443638	310352	269796	590171	619716	2.64743e+06	430899	429247	429624	458653	591305	2.73787e+06	432691	434648	427509	695854	435445	417571	2.20299e+06	439718	438892	3.33851e+06	433831
	TRUE	1-Ethynylcyclohexanol	C8 H12 O	Full match	No results	No results	Full match	No results	-1.21	124.08866	24.915	13790631.22	487	0	0				No matches found	No matches found	No matches found	No matches found	No MS2	[M+H]+1	525845	511435	528949	414198	512023	331462	485708	513525	713141	1.37906e+07	995498	581513	444509	559994	548013	1.76611e+06	541877	511514	1.76653e+06	500817	517284	535153	2.09758e+06	542799	1.07092e+06
	TRUE	Dibutyl Fumarate	C12 H20 O4	Full match	No results	No results	Full match	No results	-1.01	228.13593	24.722	4144054.822	297	0	0				No matches found	No matches found	No matches found	No matches found	No MS2	[M+H]+1	455322	453927	460486	451272	465498	2.27929e+06	449092	352364	386347	4.14405e+06	429559	440973	459796	1.45508e+06	451516	429716	486085	448451	455782	2.32514e+06	915303	4.13563e+06	457079	338483	412215
	TRUE	5-decanolide	C10 H18 O2	Full match	No results	No results	Full match	No results	-0.4	170.13061	24.576	4851623.539	1126	0	0				No matches found	No matches found	No matches found	No matches found	DDA for preferred ion	[M+H]+1	438405	477836	464323	1.24916e+06	471128	474165	478175	449663	1.14781e+06	451127	488377	402467	463518	488497	477078	1.20281e+06	735133	440646	1.8283e+06	456044	461361	465842	441857	466098	1.08843e+06
	TRUE	6PPD-quinone	C8 H20 N4 O3	Full match	No results	Invalid mass	Partial match	No results	1.76	220.15393	14.835	653746.4686	1	0	4			74.4	Single match found	Multiple matches found	No matches found	No matches found	DDA for other ion	[M+H]+1	81073.7	57124.1	75872.3	71204.7	72045.8	653746	77792.3	74546.9	78941.9	72021.5	56920.1	58633.7	170845	85835.4	73430.3	76416.7	59411.8	67380.6	75140.4	148300	63875.1	127387	79915.5	123996	83979.7
	TRUE	DL-Carnitine	C7 H15 N O3	Full match	No results	No results	Full match	No results	-0.46	161.10512	1.587	993975.8224	151	0	0				No matches found	No matches found	No matches found	No matches found	No MS2	[M+H]+1	86872.5	437118	993976	57848.9	72962.5	47011	99184.5	84518.1	64634.6	293071	420670	518019	46876	157301	148965	127339	256632	170965	614622	826674	670812	43160.9	70664.2	70424.1	61272.1
	TRUE	3-Morpholinopropylamine	C7 H16 N2 O	Full match	No results	No results	Full match	No results	-0.85	144.12614	8.149	727397.2696	133	0	0				No matches found	No matches found	No matches found	No matches found	No MS2	[M+H]+1	44949.2	43579.1	43357	53141.6	727397	389355	48397.9	46586.1	42584.5	45899.8	43586.4	221067	51035.7	38218.2	44612.9	368692	50997	45128.1	52904.1	50548	53971.5	47967	44913.5	49029.2	45269.9
	TRUE	1-Boc-3-piperidinol	C10 H19 N O3	Full match	No results	No results	Full match	No results	-0.16	201.13646	24.68	2865248.034	226	0	0				No matches found	No matches found	No matches found	No matches found	No MS2	[M+H]+1	385339	1.0094e+06	481590	379020	421836	930064	439951	386891	359721	421736	386777	388254	390179	402718	328933	388084	393968	413128	977941	726987	394153	387269	391332	661772	2.43663e+06
	TRUE	Fluoroiodomethane	C H2 F I	Invalid mass	No results	No results	Invalid mass	No results	-3.68	159.91793	25.154	7769136.265	1	0	0				No matches found	No matches found	No matches found	No matches found	No MS2	[M+ACN+H]+1	656201	6.80136e+06	1.45609e+06	581300	170767	452352	403805	306063	508751	273298	441573	644083	7.76914e+06	612810	1.22449e+06	600756	878109	1.11002e+06	632517	491502	754625	311979	839082	864167	511178
	TRUE		C H3 F4 N Si2	Full match	No results	No results	No match	No results	-0.14	160.97399	9.975	5491040.918	3	0	0				No matches found	No matches found	No matches found	No matches found	No MS2	[M+H]+1	5.49104e+06	897901	570089	788477	699086	796517	530978	683889	1.65593e+06	435132	530789	645246	711256	695099	668320	844993	2.28254e+06	798274	730636	677025	794807	573629	796221	911760	671053
	TRUE	1-(3-Aminopropyl)-2-pyrrolidone	C7 H14 N2 O	Full match	No results	No results	Full match	No results	-1.45	142.11041	11.418	480795.1379	260	0	0				No matches found	No matches found	No matches found	No matches found	No MS2	[M+H]+1	24681.2	32853.4	20768.9	26134.9	31177.3	283709	15056.9	298605	236846	32232.6	27459.4	28815.6	27233.9	17432.5	24603.8	34228.4	30244.4	31347.3	31743.3	33183.5	33488.4	308530	16588.4	29955.5	35762.9
	TRUE	(9Z)-9-Octadecenamide	C18 H35 N O	Full match	No results	No results	Full match	No results	-0.58	281.2717	24.761	17598770.57	56	0	0				No matches found	No matches found	No matches found	No matches found	No MS2	[M+H]+1	1.37397e+06	4.92897e+06	505262	865878	509694	536252	500645	491505	386485	397724	504547	7.24834e+06	558189	499135	506874	494767	525503	763102	484352	499527	528654	493839	517246	1.71538e+06	490623
	TRUE	Amide C18	C18 H37 N O	Full match	No results	No results	Full match	No results	0.08	283.28754	24.688	6646257.22	43	0	0				No matches found	No matches found	No matches found	No matches found	No MS2	[M+H]+1	384317	396384	416537	390544	667244	389298	413383	311838	526843	397975	385751	387224	385264	410399	306795	500977	389638	474136	404144	384424	785662	410186	403321	390442	377484
	TRUE		C19 H42 F N6 O P	Full match	No results	No results	No match	No results	2.16	420.31508	24.471	5544470.892	3	0	0				No matches found	No matches found	No matches found	No matches found	No MS2	[M+H]+1	412492	395448	399096	2.84457e+06	372750	384578	401392	374339	364011	385413	409406	404845	551018	409356	5.54447e+06	388014	415663	384946	530522	390963	427136	380388	849447	402311	726250
	TRUE	4-Octyloxyaniline	C14 H23 N O	Full match	No results	No results	Full match	No results	-1.1	221.17772	12.675	412264.7347	173	0	0				No matches found	No matches found	No matches found	No matches found	No MS2	[M+H]+1	21621.2	19001.5	33725.8	30914.7	65199.2	72107.5	412265	119033	31228.8	30785.8	25287.6	23734.1	32945.8	20065.8	29022.7	29715.2	31910.7	29372.5	31191.3	29682.9	24858.8	27911.4	30766.1	30207.4	30591
	TRUE	N-tert-Butyl-α-phenylnitrone	C11 H15 N O	Full match	No results	No results	Full match	No results	-0.46	177.11528	9.444	1771495.502	725	0	0				No matches found	No matches found	No matches found	No matches found	No MS2	[M+H]+1	233187	223114	259925	238507	182441	217700	223820	279579	312629	233572	242437	276669	389259	261129	218371	282238	234570	210732	277062	297496	247362	254862	209294	204563	1.7715e+06
	TRUE	4-Benzylpiperidine	C12 H17 N	Full match	No results	No results	Full match	No results	-0.69	175.13598	10.602	743642.062	272	0	0				No matches found	No matches found	No matches found	No matches found	No MS2	[M+H]+1	37239.8	46604.3	743642	109013	38987.1	46308.6	34856.9	577886	49970.3	130792	31282.7	48398.2	49142.5	46814.3	47717.9	52922.5	40040	101322	46150.4	128761	48656.4	48881.6	45179.2	41030	52036.6
	TRUE	4-Benzylpiperidine	C12 H17 N	Full match	No results	No results	Full match	No results	-2.08	175.13574	14.006	694614.1317	272	0	0				No matches found	No matches found	No matches found	No matches found	No MS2	[M+H]+1	43672.2	52537.2	58670.7	60211.4	42180.5	58404	61694.1	58921.8	59283.1	59583.8	52006.9	53454.7	59228.2	40080.4	60248.4	59804.9	62392.8	406239	60936.8	46079.5	55033.4	61266.9	61573.2	49515	60540.2
	TRUE	N-(2-Hydroxypropyl) methacrylamide	C7 H13 N O2	Full match	No results	No results	Full match	No results	-0.37	143.09458	24.663	3798604.074	520	0	0				No matches found	No matches found	No matches found	No matches found	No MS2	[M+H-NH3]+1	212591	583368	423143	310352	432773	495120	619716	2.64743e+06	697577	404824	401347	409790	591305	2.73787e+06	845570	405481	427509	695854	338862	239977	2.20299e+06	408298	419237	424904	390592
	TRUE	Lauramine	C12 H25 N O	Full match	No results	No results	Full match	No results	-0.52	199.19351	13.231	1896048.867	97	0	0				No matches found	No matches found	No matches found	No matches found	DDA for preferred ion	[M+H]+1	69191.3	46483.8	69460	65522.9	367744	56913.5	842142	59033.1	429597	99608.6	360515	56512.9	57522.2	50628.8	65974.4	147774	130742	393063	86572.9	71523.5	60984.4	242453	60230.6	42724.3	57209.9
	TRUE	(3R,4R)-1-Benzyl-N,4-dimethylpiperidin-3-amine	C14 H22 N2	Full match	No results	No results	Full match	No results	-0.37	218.17822	9.446	497803.9247	158	0	0				No matches found	No matches found	No matches found	No matches found	No MS2	[M+H]+1	42185.6	45404.2	40436.7	41309.3	32907.7	41383	38145.8	40149.4	42822.7	39553.6	37719	39172.7	401755	146222	38048.1	38808.4	79024.2	40514.3	39886.8	43002.2	43977.7	40886	37483.5	39264	39211.2
	TRUE	N-NITROSOPIPERIDINE	C5 H10 N2 O	Full match	No results	No results	Full match	Full match	0.09	114.07932	5.838	650571.3423	122	0	0				No matches found	No matches found	No matches found	Single match found	DDA for preferred ion	[M+H]+1	336700	56049.7	33949.5	57447.7	55105.7	84355.8	58964.5	55366	53140	37213	202080	650571	211426	293958	57343.7	56081.1	50092.4	56489	52084	54992.4	168589	75854.1	56871.3	55265.4	54542.1
	TRUE	Cyclopentane	C5 H10	Full match	No results	No results	Full match	Full match	0.66	70.0783	24.284	6250519.639	16	0	0				No matches found	No matches found	No matches found	Single match found	No MS2	[M+H]+1	795658	672729	368520	531599	563879	443721	473666	476488	462525	432728	651253	498903	469838	585424	631385	543152	502067	670623	558122	363123	672141	621567	6.25052e+06	610901	572801
	TRUE	Cyclopentane	C5 H10	Full match	No results	No results	Full match	Full match	0.82	70.07831	24.211	6250519.639	16	0	0				No matches found	No matches found	No matches found	Single match found	No MS2	[M+H]+1	1.0673e+06	741112	494159	618685	716448	729639	569229	585126	519746	599911	485678	508919	676095	804531	548118	477804	542058	662553	795625	631137	534398	642802	6.25052e+06	763311	593391
	TRUE	L-(+)-Valinol	C5 H13 N O	Full match	No results	No results	Full match	No results	-0.71	103.09964	24.843	7446887.382	76	0	0				No matches found	No matches found	No matches found	No matches found	No MS2	[M+H]+1	652254	641720	615064	603392	630425	607869	629454	7.44689e+06	632893	624631	637756	630644	624857	598562	661172	603814	660293	629913	753967	616791	605170	664792	617271	649582	615978
	TRUE		C H2 F2 I P S Si2	Full match	No results	No results	No match	No results	0.78	297.81684	1.795	460004.215	1	0	0				No matches found	No matches found	No matches found	No matches found	DDA for other ion	[M+H]+1	82807.6	313464	150604	71703.1	202561	102803	56380.3	171216	50806.3	348542	96542.8	87492.1	200852	86185.6	77209	89830.7	68923.6	67094.1	295825	68424.5	77018.6	194920	140530	46975.4	125929
	TRUE		C H6 F P3 S3	Invalid mass	No results	No results	Invalid mass	No results	3.61	225.88367	10.386	1335406.006	3	0	0				No matches found	No matches found	No matches found	No matches found	No MS2	[M+H]+1	46709.6	50235.5	39255.8	47275.8	66142	47199.8	42748	65374.6	301568	65715.2	216509	48270.9	53340.3	49055.5	1.33541e+06	209318	37220.5	49730.4	1.29917e+06	50207.6	70080.7	338128	639342	43881.3	52052.8
	TRUE	(3R,4R)-1-Benzyl-N,4-dimethylpiperidin-3-amine	C14 H22 N2	Full match	No results	No results	Full match	No results	0.05	218.17831	8.921	530727.8091	158	0	0				No matches found	No matches found	No matches found	No matches found	No MS2	[M+H]+1	41610.5	41523.5	38445.5	43595	50120.6	247713	36275	40649.8	35046.6	124831	43038.2	189171	37645.8	38485.6	43323.8	36457.1	41936.4	37081.5	27496.3	38546.1	41737	37690.7	173928	40715.1	530728
	TRUE	1,2,3,4-Tetramethylcyclopentadiene	C9 H14	Full match	No results	No results	Full match	No results	-0.81	122.10945	24.7	4518340.227	172	0	0				No matches found	No matches found	No matches found	No matches found	No MS2	[M+H]+1	2.83665e+06	541615	871200	520356	543729	2.59291e+06	534811	501003	524807	509829	4.51834e+06	3.40916e+06	525486	534981	551650	524590	548829	522268	729659	537117	502932	392968	521792	516837	491846
	TRUE	N-Methylpyrrolidone	C5 H9 N O	Full match	No results	No results	Full match	Full match	-0.9	99.06832	24.615	3259960.93	132	0	0				No matches found	No matches found	No matches found	Single match found	No MS2	[M+H]+1	2.13794e+06	2.81568e+06	528358	892175	1.64247e+06	539602	520961	516944	469675	504774	510289	503189	332669	525591	2.74927e+06	525127	508550	388147	508861	826284	520396	961315	502611	514724	304309
	TRUE	4-Benzylpiperidine	C12 H17 N	Full match	No results	No results	Full match	No results	-0.62	175.13599	9.821	724295.1338	272	0	0				No matches found	No matches found	No matches found	No matches found	No MS2	[M+H]+1	82156.3	116190	50278.4	71035.3	44927.3	50567.4	57536	42642.2	83071.3	51684.6	495399	56021.4	57994.9	57717.7	51603.8	724295	505257	201861	52745.5	43922.1	210229	125305	166703	401789	96515.7
	TRUE	Tremorine	C12 H20 N2	Full match	No results	No results	Full match	No results	-2.01	192.16226	24.844	3179769.392	136	0	0				No matches found	No matches found	No matches found	No matches found	No MS2	[M+H]+1	511364	523198	501466	491541	513989	495599	513197	482660	598427	509265	519966	514167	491377	487008	539058	466729	538340	513572	485724	3.17977e+06	1.43984e+06	1.79726e+06	703856	529608	965125
	TRUE		C19 H46 F N8 P	Full match	No results	No results	Unused	No results	2.78	436.35792	22.045	4169891.236	2	0	0				No matches found	No matches found	No matches found	No matches found	No MS2	[M+H]+1	247030	222414	178637	792995	4.16989e+06	624468	244407	152056	164143	149290	160946	167641	170037	159666	166859	1.94865e+06	235333	1.05191e+06	154303	162462	159286	159065	158405	180940	183234
	TRUE		C3 H3 N S2 Si	Full match	No results	No results	Invalid mass	No results	-2.69	144.94723	24.716	5858158.036	1	0	0				No matches found	No matches found	No matches found	No matches found	No MS2	[M+H]+1	357394	515479	436391	413290	431854	415102	425593	413274	1.06684e+06	5.85816e+06	511498	417898	435737	424906	438145	407230	460650	424985	431932	1.56811e+06	411374	1.3192e+06	520886	404868	390646
	TRUE	4-Benzylpiperidine	C12 H17 N	Full match	No results	No results	Full match	No results	-0.76	175.13597	9.937	566618.742	272	0	0				No matches found	No matches found	No matches found	No matches found	No MS2	[M+H]+1	82882.8	55429.9	37061.4	183820	104572	47936.3	55365.8	44878.3	59231.7	232918	95199.7	53086	60829.8	50248.3	48206.6	53302.5	81420.1	302178	48076.2	47203.9	162866	92351.9	35471.6	40830.1	47328.1
	TRUE	4-Benzylpiperidine	C12 H17 N	Full match	No results	No results	Full match	No results	-0.98	175.13593	11.036	466081.7094	272	0	0				No matches found	No matches found	No matches found	No matches found	No MS2	[M+H]+1	73039.1	40657.5	63092.9	46687	52463.6	56997.2	138120	42341.5	46244.3	52523.9	35044.4	466082	91168.1	105255	52746	195120	59510.6	49702.2	56138.4	33881.3	51659.1	95751.1	439570	161368	387279
	TRUE	Phenethylamine	C8 H11 N	Full match	No results	No results	Full match	No results	-1.55	121.08896	7.617	5792161.198	96	0	0				No matches found	No matches found	No matches found	No matches found	No MS2	[M+H]+1	1.52109e+06	260213	489100	1.33835e+06	233645	306125	275985	307536	315138	456962	524815	275466	255051	247200	476417	299329	214383	284836	253496	268730	248431	5.79216e+06	270509	278926	4.65317e+06
	TRUE	2-OXOCYCLOHEXANECARBOXYLICACID	C7 H10 O3	Full match	No results	No results	Full match	No results	0.01	142.06299	24.717	1990703.095	389	0	0				No matches found	No matches found	No matches found	No matches found	No MS2	[M+H]+1	421449	410758	416694	394635	1.9907e+06	396366	406383	394620	393836	390680	388708	399036	416069	405727	418369	388849	439858	405803	412436	396728	410161	390558	413610	399441	373013
	TRUE		C8 H15 F Si	Full match	No results	No results	Invalid mass	No results	-0.7	158.0926	9.177	405418.332	12	0	0				No matches found	No matches found	No matches found	No matches found	No MS2	[M+H]+1	50985.1	50708.1	54068	46721.1	50140.1	89248	45400.7	62311.3	385118	85967.6	44619.5	73173.1	126966	46741.7	48087.7	58297.4	45291.5	42279.1	79047.3	107843	169124	46370.3	237252	56319.7	89379.7
	TRUE	Diethylene glycol	C4 H10 O3	Full match	No results	No results	Full match	No results	-0.76	106.06291	24.931	2806190.856	25	0	0				No matches found	No matches found	No matches found	No matches found	No MS2	[M+H]+1	435428	723784	441954	994848	1.59445e+06	449638	427811	428840	916128	432195	2.42188e+06	486738	449776	446372	443548	412350	454584	278243	434397	837312	441475	454641	1.19912e+06	693306	440102
	TRUE		C45 H93 F I N6 O P Si2	Full match	No results	No results	No match	No results	-0.6	966.571	17.086	2221237.033	7	0	0				No matches found	No matches found	No matches found	No matches found	No MS2	[M+2H]+2	402103	1.32298e+06	318012	114143	111833	112252	512739	344009	498820	1.15064e+06	294741	382285	1.23653e+06	1.05336e+06	511017	1.57511e+06	149267	328991	1.63491e+06	1.27844e+06	1.42009e+06	163631	704565	408492	1.20347e+06
	TRUE	N(1)-acetylspermidine	C9 H21 N3 O	Full match	No results	No results	Full match	No results	-0.09	187.16844	24.736	4427791.802	21	0	0				No matches found	No matches found	No matches found	No matches found	No MS2	[M+H]+1	725136	978865	2.00944e+06	799717	680460	752595	4.42779e+06	2.86368e+06	738305	716786	1.40066e+06	1.66238e+06	760056	716035	756425	745423	770885	767012	866621	3.79668e+06	3.13326e+06	2.32623e+06	912581	731751	710041
	TRUE	3-Methylbutanoic acid	C5 H10 O2	Full match	No results	No results	Full match	No results	-0.44	102.06803	0.339	13032725.85	163	0	0				No matches found	No matches found	No matches found	No matches found	No MS2	[M+H]+1	434566	182475	291837	518589	267217	210782	392806	304735	528605	326860	333924	301299	331479	415614	150525	328900	110372	157660	2.67514e+06	270646	596570	431226	274757	423065	288421
	TRUE	Ethyl 2-oxocyclohexanecarboxylate	C9 H14 O3	Full match	No results	No results	Full match	No results	1.61	170.09457	24.405	11961233.1	668	0	0				No matches found	No matches found	No matches found	No matches found	No MS2	[M+H]+1	670136	429687	379972	408984	505142	346868	389528	387389	379308	370497	387666	405030	366028	380152	388824	399239	406302	369244	257097	364656	399935	1.03189e+07	374330	757872	351597
	TRUE		C2 H2 I O2 P Si	Invalid mass	No results	No results	No match	No results	-4.44	243.85955	1.444	3498351.699	3	0	0				No matches found	No matches found	No matches found	No matches found	No MS2	[M+H]+1	297916	433933	224449	306304	111615	139061	216101	173345	855840	405259	251691	1.53543e+06	826030	162828	348293	266025	240655	299765	223913	336001	3.49835e+06	281875	291719	289387	303067
	TRUE	N(1)-acetylspermidine	C9 H21 N3 O	Full match	No results	No results	Full match	No results	-0.71	187.16833	24.727	4427791.802	21	0	0				No matches found	No matches found	No matches found	No matches found	No MS2	[M+H]+1	660998	717772	2.00944e+06	799717	680460	660222	4.42779e+06	636034	639280	730876	1.40066e+06	1.66238e+06	649831	652702	671421	616273	686986	353402	660910	3.79668e+06	3.13326e+06	2.32623e+06	971565	660508	609488
	TRUE		C3 H8 N2 Si2	Full match	No results	No results	Invalid mass	No results	1.53	128.0228	7.625	897052.7877	50	0	0				No matches found	No matches found	No matches found	No matches found	DDA for preferred ion	[M+H]+1	152825	454845	653582	182768	27206.8	49797.7	44437.2	265120	39812.2	584006	45604.5	48083.5	42154.4	41884.7	897053	62110.3	42898.3	499942	39976.8	129226	417238	159244	218253	44769.4	185708
	TRUE	Amide C18	C18 H37 N O	Full match	No results	No results	Full match	No results	-0.19	283.28746	24.665	8278080.541	43	0	0				No matches found	No matches found	No matches found	No matches found	No MS2	[M+H]+1	985868	551109	543146	552770	667244	529591	501306	225881	520433	401968	517082	526005	544607	558504	1.06422e+06	520474	546368	572940	545158	514028	785662	524091	608120	545405	342831
	TRUE	Deanol	C4 H11 N O	Full match	No results	No results	Full match	No results	-1.21	89.08396	24.611	6013599.567	43	0	0				No matches found	No matches found	No matches found	No matches found	No MS2	[M+H]+1	314923	351087	273704	623865	1.85337e+06	361720	349224	370433	2.41844e+06	338373	6.0136e+06	337310	343830	672932	353177	352016	332801	345037	341113	328216	348845	344192	309784	345043	341429
	TRUE	1,2,4-triphosphole	C2 H3 P3	Full match	No results	No results	Full match	No results	1.97	119.945	24.743	5399005.228	1	0	0				No matches found	No matches found	No matches found	No matches found	DDA for preferred ion	[M+H]+1	654293	1.36678e+06	523381	717813	692155	5.39901e+06	733306	651262	685621	340798	1.93547e+06	676791	685801	659777	709451	874012	696771	692077	688218	682434	1.27285e+06	691207	736761	687224	640672
	TRUE	[(1E)-3,4-Dimethyl-1-pentenyl](fluoro)dimethylsilane	C9 H19 F Si	Full match	No results	No results	Full match	No results	-1.57	174.12373	18.887	5536964.425	1	0	0				No matches found	No matches found	No matches found	No matches found	DDA for preferred ion	[M+H]+1	454390	1.04137e+06	284940	190888	118424	89708.3	481052	70847.3	1.22007e+06	166242	134705	139802	1.73094e+06	2.54245e+06	1.04753e+06	121111	239083	134895	132827	212409	136981	5.53696e+06	3.4981e+06	4.00179e+06	113574
	TRUE	Amide C18	C18 H37 N O	Full match	No results	No results	Full match	No results	-0.26	283.28744	24.627	8278080.541	43	0	0				No matches found	No matches found	No matches found	No matches found	No MS2	[M+H]+1	507555	525750	544846	516900	667244	540964	489307	533076	521016	520526	509425	543847	518440	552247	543300	537283	544184	519357	507773	1.31594e+06	785662	637788	520416	530786	514414
	TRUE	NH2-C2-NH-Boc	C7 H16 N2 O2	Full match	No results	No results	Full match	No results	0.07	160.12119	24.674	4316322.654	117	0	0				No matches found	No matches found	No matches found	No matches found	No MS2	[M+H]+1	367474	380369	4.31632e+06	365772	434856	414420	420231	357249	338159	406663	230949	317369	373470	385473	364576	371466	377097	395437	473869	691076	357472	361721	1.21185e+06	374717	346035
	TRUE		C14 H35 F N6 O3	Full match	No results	No results	No match	No results	2.28	354.27628	24.428	9273361.339	101	0	0				No matches found	No matches found	No matches found	No matches found	No MS2	[M+H]+1	310366	323313	328024	318212	326699	314272	301056	297514	329201	9.27336e+06	322913	320138	325499	306601	371200	306511	334673	326012	362454	308421	349148	4.01379e+06	343011	403997	314555
	TRUE	1-phenethylpiperidine	C13 H19 N	Full match	No results	No results	Full match	No results	-1.11	189.15154	7.673	749513.7097	240	0	0				No matches found	No matches found	No matches found	No matches found	No MS2	[M+H]+1	177576	411269	231468	106125	59923.3	45643	63505.5	381656	259873	68673.1	575077	62466	59054.9	58093.9	128151	64030.2	55388.8	270944	55335.2	181997	186514	64021.2	68009.1	61414.9	687381
	TRUE	Isoniazid	C6 H7 N3 O	Full match	No results	No results	Full match	No results	2.83	137.0593	24.395	3925182.389	122	0	0				No matches found	No matches found	No matches found	No matches found	No MS2	[M+2H]+2	547003	2.31962e+06	260627	309122	174490	3.92518e+06	767768	199469	941755	261651	271124	634092	271627	783851	519101	833957	665199	153605	293817	233398	281602	465610	803095	2.30456e+06	252171
	TRUE	Deanol	C4 H11 N O	Full match	No results	No results	Full match	No results	-1.29	89.08395	24.583	6013599.567	43	0	0				No matches found	No matches found	No matches found	No matches found	No MS2	[M+H]+1	342487	474511	389910	437581	689210	474060	443775	446534	2.41844e+06	441529	6.0136e+06	476549	460293	672932	460827	441931	471300	437580	428684	452871	458151	1.64661e+06	448975	461289	526618
	TRUE	1-Cyclohexenecarboxylic Acid	C7 H10 O2	Full match	No results	No results	Full match	No results	-1.33	126.06791	24.573	3798604.074	470	0	0				No matches found	No matches found	No matches found	No matches found	No MS2	[M+H]+1	538252	469630	569128	310352	269796	495120	619716	2.64743e+06	1.52824e+06	1.33706e+06	598612	588206	568141	598759	590963	545478	791493	695854	378174	558980	565498	570990	541591	3.33851e+06	531528
	TRUE	Formanilide	C7 H7 N O	Full match	No results	No results	Full match	No results	-1.77	121.05255	6.809	2184038.156	95	0	0				No matches found	No matches found	No matches found	No matches found	No MS2	[M+H]+1	116778	232680	107030	151397	485136	304722	2.18404e+06	211790	148880	380371	721279	159729	140784	119358	724919	154015	85016.8	223550	391580	111344	114717	230731	159425	246670	149218
	TRUE	3,5-DIMETHYLPYRAZOL-1-METHANOL	C6 H10 N2 O	Full match	No results	No results	Full match	No results	-0.7	126.07922	11.111	709209.2743	187	0	0				No matches found	No matches found	No matches found	No matches found	DDA for preferred ion	[M+H]+1	53945.4	50230.8	56993.1	75683.7	53756	24011.6	58775.4	36273.6	85665.8	58564.6	41712.5	40742.3	56585.4	71806.3	60377.7	194186	65940.6	17672	67296.5	37553.8	62506.6	64579.8	81139.1	71984.5	249085
	TRUE		C H6 F P3 S3	Full match	No results	No results	No match	No results	2.19	225.88334	11.595	407944.8817	1	0	0				No matches found	No matches found	No matches found	No matches found	No MS2	[M+H]+1	407945	47100.8	78064.5	67029.6	58287.5	67841.2	68267.3	79607.7	63236.8	63577.4	62190.4	45415.4	151228	60184.2	55214.5	56104.1	57711.5	60557.4	57145.8	57282	53100.4	58376	56598.4	55183	60422.7
	TRUE	N-(2-Hydroxyhexadecyl)diethanolamine	C20 H43 N O3	Full match	No results	No results	Full match	No results	-0.22	345.32422	14.833	1764357.201	5	0	0				No matches found	No matches found	No matches found	No matches found	DDA for preferred ion	[M+H]+1	117550	81464.3	106380	99835.8	101306	103876	109072	104522	110684	100981	79807.5	82210.1	101651	101295	102956	107144	83301.1	104787	105354	90366.2	93576.3	106291	112049	197122	101899
	TRUE		C2 H3 N2 P3	Full match	No results	No results	Invalid mass	No results	-2.67	147.95051	24.395	1922016.075	5	0	0				No matches found	No matches found	No matches found	No matches found	No MS2	[M+H]+1	360519	361323	306234	343564	645573	1.19574e+06	338447	353663	338353	332976	345031	361204	345672	348908	366855	369208	754312	526720	392202	334129	500080	354905	362858	524411	1.03187e+06
	TRUE	IPMP	C10 H14 O	Full match	No results	No results	Full match	Full match	-1.35	150.10426	24.562	11642056.58	625	0	0				No matches found	No matches found	No matches found	Multiple matches found	No MS2	[M+H]+1	956016	1.5272e+06	338555	578422	299915	571139	538279	523543	575816	543389	1.11112e+06	578032	302904	588403	1.16428e+06	600602	370925	587863	534797	549312	557988	561413	507448	2.42228e+06	551939
	TRUE	4-Phenylcyclohexanone	C12 H14 O	Full match	No results	No results	Full match	No results	-0.78	174.10433	13.086	3461699.241	442	0	0				No matches found	No matches found	No matches found	No matches found	No MS2	[M+H]+1	291429	323540	371609	201102	299855	276170	305500	343369	324377	291456	341857	279495	317703	1.91465e+06	348914	331504	331461	309666	299053	3.4617e+06	263664	415699	309637	313799	395809
	TRUE	Benzaldehyde	C7 H6 O	Full match	No results	No results	Full match	No results	-1.39	106.04172	11.689	3133862.316	19	0	0				No matches found	No matches found	No matches found	No matches found	DDA for preferred ion	[M+H]+1	319083	270273	204079	213465	263950	425868	224190	273602	296541	197577	270408	198623	270338	194633	276793	153475	3.13386e+06	246460	243824	166677	175745	265920	173440	229778	244114
	TRUE	tert-butyl octahydropyrrolo[3,4-c]pyrrole-2-carboxylate	C11 H20 N2 O2	Full match	No results	No results	Full match	No results	-1.06	212.15225	14.997	1497929.187	200	0	0				No matches found	No matches found	No matches found	No matches found	DDA for preferred ion	[M+H]+1	86907.8	120881	89569.4	50910.2	790317	85318.4	108488	100181	80483.4	80076.1	66640.4	68964.7	44764.2	78729.8	56172.5	202436	67838.9	134353	78184.1	139717	89617.2	267032	263532	69582.6	85064.2
	TRUE	3-Morpholinopropylamine	C7 H16 N2 O	Full match	No results	No results	Full match	No results	-0.83	144.12614	7.676	796707.1607	133	0	0				No matches found	No matches found	No matches found	No matches found	DDA for other ion	[M+H]+1	292862	705523	127044	57632.2	39193.5	51414.8	44215.9	103309	43519.5	30220.8	641919	43492.2	41117.2	40448	79293.7	44581.3	38564.7	443237	38527.3	160374	129861	44574.9	65696.6	42760.3	796707
	TRUE	valdipromide	C11 H23 N O	Full match	No results	No results	Full match	No results	0.02	185.17797	7.481	867943.7224	122	0	0				No matches found	No matches found	No matches found	No matches found	No MS2	[M+H]+1	69903.9	88257.2	421361	237394	69809.3	65195.3	66074.7	36322.9	250443	61816.4	38273.9	64655.5	68050.5	147077	67279.7	65354.3	31968.4	126705	65860.8	68027.9	62356.6	67824.7	44497.6	174151	67306.6
	TRUE		C H6 F N2 O3 P	Full match	No results	No results	Invalid mass	No results	-0.85	144.00988	24.43	3381907.202	10	0	0				No matches found	No matches found	No matches found	No matches found	No MS2	[M+H]+1	1.60299e+06	766510	1.14624e+06	382153	1.6836e+06	682529	461414	386203	318558	384080	604863	383635	388125	396608	3.13322e+06	382035	227976	562077	623874	367761	416324	250001	290236	390776	417688
	TRUE	Cyclohexane	C6 H12	Full match	No results	No results	Full match	Full match	-1.69	84.09376	24.565	4244707.543	35	0	0				No matches found	No matches found	No matches found	Multiple matches found	No MS2	[M+H]+1	346859	368669	377223	240813	372132	374530	492337	318389	377597	358097	385756	379051	395615	4.24471e+06	452392	358336	374876	684168	350699	360217	361567	552599	1.31934e+06	368159	771209
	TRUE	Laurolactam	C12 H23 N O	Full match	No results	No results	Full match	No results	-1.16	197.17774	7.681	392967.3184	174	0	0				No matches found	No matches found	No matches found	No matches found	No MS2	[M+H]+1	46880.5	105604	48262.3	42848.3	39730.2	32112.7	44821.3	116267	141543	48468.5	392967	44087.6	41680.1	41001.8	49040.1	45191.6	39092.7	167923	39054.8	60755.3	131639	44417.3	43161.8	42827.5	212729
	TRUE	Ethosuximide	C7 H11 N O2	Full match	No results	No results	Full match	No results	-0.55	141.0789	9.331	682331.22	395	0	0				No matches found	No matches found	No matches found	No matches found	DDA for other ion	[M+H]+1	528039	129192	57647.4	57944.4	60719	682331	56410.2	65714.4	107225	76087.2	56988.7	60821.4	49863.5	54951	57603.7	63626.5	58194.2	60803.4	64191.6	164482	55706.7	79853.9	55735.9	54803	59079.3
	TRUE	4-(4-Fluorobenzyl)piperidine	C12 H16 F N	Full match	No results	No results	Full match	No results	1.77	193.12702	7.627	2499181.546	38	0	0				No matches found	No matches found	No matches found	No matches found	DDA for preferred ion	[M+H]+1	67475.5	664801	143852	64092.5	54177.3	61603.9	54972.5	1.90089e+06	50564.4	50423.1	1.4967e+06	162671	103379	51814.7	226025	104443	53293.6	2.49918e+06	49454.5	54895.5	293239	75251.2	1.10375e+06	55383.4	62937.2
	TRUE		C7 H N S Si	Full match	No results	No results	No match	No results	1.36	158.96011	24.384	2781970.349	1	0	0				No matches found	No matches found	No matches found	No matches found	No MS2	[M+H]+1	420924	1.34333e+06	1.59847e+06	395838	449029	230961	1.46007e+06	442236	383244	1.59894e+06	384368	1.05549e+06	1.14066e+06	415891	1.3473e+06	951552	1.53017e+06	1.30299e+06	2.01233e+06	2.78197e+06	1.47805e+06	451536	1.01492e+06	223348	644995
	TRUE		C H3 F3 O P2	Invalid mass	No results	No results	Invalid mass	No results	4.26	149.96176	24.189	3947288.415	2	0	0				No matches found	No matches found	No matches found	No matches found	No MS2	[M+H]+1	190729	181565	3.94729e+06	213685	192858	220410	228124	282339	243813	224630	175303	282174	182577	182970	185416	284121	184510	196177	181227	261296	270107	183401	194237	181943	168405
	TRUE		C18 H41 N9 O4	Full match	No results	No results	No match	No results	0.39	447.32832	18.569	4321104.223	7	0	0				No matches found	No matches found	No matches found	No matches found	No MS2	[M+H]+1	118374	300971	841749	83685.5	83313.9	75753.1	82602.7	78902.1	77834.4	863690	67260.6	2.49196e+06	75527.5	80888.3	393664	164362	116338	603585	114347	90924.6	256318	1.73674e+06	216151	373328	283704
	TRUE	1,3-Dicyclohexylurea	C13 H24 N2 O	Full match	No results	No results	Full match	Full match	-0.03	224.18886	10.857	2708918.151	69	0	0				No matches found	No matches found	No matches found	Single match found	No MS2	[M+H]+1	31007.7	40567.7	56630	53897.3	47621.6	53950	51304.3	37990.9	45986.5	52752.7	34249	47592.3	666170	50572.1	47390.5	49531	83451.6	54334.6	196293	53291.2	53313.1	48781.8	39646.2	50030.2	56954.4
	TRUE	TRIALLYL PENTAERYTHRITOL	C14 H24 O4	Full match	No results	No results	Full match	No results	-0.92	256.16722	24.497	7231561.165	207	0	0				No matches found	No matches found	No matches found	No matches found	No MS2	[M+H]+1	436216	441063	431954	424302	437521	437275	428950	421317	429374	423478	422341	434728	429534	453681	441426	431763	440531	819586	415232	438570	422450	423903	451977	424507	1.36997e+06
	TRUE		C13 H38 F N10 O3 P	Full match	No results	No results	No match	No results	0.21	432.28509	24.076	4753660.787	3	0	0				No matches found	No matches found	No matches found	No matches found	No MS2	[M+H]+1	192591	205561	278223	202690	527450	251627	194157	651985	565779	317737	275710	494441	315823	202983	4.41443e+06	286652	220800	255158	3.89144e+06	210877	202365	198841	209890	397793	4.75366e+06
	TRUE	1,3-Dicyclohexylurea	C13 H24 N2 O	Full match	No results	No results	Full match	Full match	-0.79	224.18869	7.684	2519117.446	69	0	0				No matches found	No matches found	No matches found	Single match found	No MS2	[M+H]+1	792573	517841	40473.3	35735.2	33324.9	25749.7	37380.7	35119.6	1.47441e+06	63156.1	2.51912e+06	35897.9	34761	34195.3	139217	288406	33618.6	37445.1	32571.5	50669.6	131794	39778.9	299367	35717.9	2.15134e+06
	TRUE	4-pentynylbenzene	C11 H12	Full match	No results	No results	Full match	No results	-1.63	144.09367	7.524	461379.9608	92	0	0				No matches found	No matches found	No matches found	No matches found	No MS2	[M+H]+1	45400.1	44990.6	42869.4	41763.6	48888.3	109495	27109.1	45431	46363.4	24607.7	55159.9	80796.9	36137.7	47368.7	87556.4	45258	47709.2	55857.2	49327.4	46579.4	38649.1	57708.7	72818.1	47960.6	40803.7
	TRUE	Methylcyclohexylamine	C7 H15 N	Full match	No results	No results	Full match	No results	-1.63	113.12027	25.257	2595720	113	0	0				No matches found	No matches found	No matches found	No matches found	No MS2	[M+H]+1	103014	104700	106935	88314	99512.4	105136	102112	99265.9	100139	93714.4	2595720	100307	99214.9	101992	100792	56087.3	100178	105481	109754	106131	108782	105204	106799	104045	102798
	TRUE	(3E)-4,8-Dimethyl-1,3,7-nonatriene	C11 H18	Full match	No results	No results	Full match	No results	-0.39	150.14079	24.461	8499101.875	188	0	0				No matches found	No matches found	No matches found	No matches found	No MS2	[M+H]+1	576611	617091	622784	594362	581671	561454	601340	584151	540923	597478	638873	8.4991e+06	561144	638795	593182	605490	648637	600703	628420	692979	666540	593590	603003	627801	545149
	TRUE	Ethyl 2-Cyclohexanoneacetate	C10 H16 O3	Full match	No results	No results	Full match	No results	-2.75	184.10944	2.911	3245492.279	674	0	0				No matches found	No matches found	No matches found	No matches found	DDA for preferred ion	[M+H]+1	74862.7	62097.2	210676	287165	994552	229760	112727	218871	246926	286627	119753	316323	290863	2.79517e+06	103825	433201	61841.9	57183.2	185553	207883	353835	251390	146819	172323	1.19113e+06
	TRUE		C H6 F P3 S3	Full match	No results	No results	Unused	No results	2.85	225.88349	9.749	655939.7068	2	0	0				No matches found	No matches found	No matches found	No matches found	No MS2	[M+H]+1	160105	454575	72669.2	108127	62228.9	86022.2	118345	86553.1	284992	70192.5	65240.3	96586.8	54798.3	91504.6	79527.5	96262	164164	51973.3	97153.5	78740.9	62339.8	104235	48604.4	243706	87218.2
	TRUE	Nitrosobis(2-oxopropyl)amine	C6 H10 N2 O3	Full match	No results	No results	Full match	No results	0.29	158.06919	1.585	846916.3458	203	0	0				No matches found	No matches found	No matches found	No matches found	DDA for preferred ion	[M+H]+1	143317	117984	93027.9	99173.9	125084	80593.9	80935.3	105954	91898.2	81967.6	103087	86665	96404.6	121455	137061	135423	75639.1	84432.4	123275	116322	174539	76000.4	121144	82354.8	111742
	TRUE	1,2-Dioxin	C4 H4 O2	Full match	No results	No results	Full match	No results	-0.84	84.02106	0.676	6935893.786	29	0	0				No matches found	No matches found	No matches found	No matches found	No MS2	[M+H]+1	2.99495e+06	1.16924e+06	1.02961e+06	983757	1.06571e+06	735457	849558	2.12706e+06	1.2671e+06	1.00345e+06	869195	1.13739e+06	868924	1.1584e+06	897162	1.01455e+06	830874	950033	983904	1.21151e+06	878015	786009	1.03161e+06	1.12547e+06	1.09331e+06
	TRUE	2-Carbethoxycyclopentanone	C8 H12 O3	Full match	No results	No results	Full match	No results	2.6	156.07905	0.784	651130.4094	601	0	0				No matches found	No matches found	No matches found	No matches found	DDA for preferred ion	[M+H]+1	42469.1	58317	68732.8	160085	303975	237282	90244.8	52443	352971	137428	58546	41409.9	133233	563588	258449	116945	56309.5	426289	248073	69916.3	651130	67373.8	130985	166138	93242.7
	TRUE	Coumarone	C8 H6 O	Full match	No results	No results	Full match	No results	-1.99	118.04163	10.975	988837.8268	17	0	0				No matches found	No matches found	No matches found	No matches found	DDA for preferred ion	[M+H]+1	873121	988838	917316	115623	106064	116354	130649	102781	94788.4	109702	72524.6	94054.6	113446	126586	107614	106441	114607	118684	118629	93847.3	116432	104211	248347	108811	105132
	TRUE	Adenine	C5 H5 N5	Full match	No results	No results	Full match	No results	0.1	135.05451	6.93	649486.4939	66	0	0				No matches found	No matches found	No matches found	No matches found	DDA for preferred ion	[M+H]+1	77867.9	68625.5	70157.2	116633	70795.9	70854.8	296946	75460.2	50624.8	74203.1	124083	70839.9	137504	55114	52201.4	65767.7	340196	75315.3	73661.1	62111.2	65924.5	56924	77797	77289.8	26807.8
	TRUE	4,6-Diamino-5-formamidopyrimidine	C5 H7 N5 O	Full match	No results	No results	Full match	No results	-0.48	153.06499	11.326	3255140.934	24	0	0				No matches found	No matches found	No matches found	No matches found	DDA for other ion	[M+NH4]+1	182435	733485	134474	50804.1	295368	57817.5	115941	97299.1	161783	816750	173801	632016	909991	64493.2	3.25514e+06	264884	184786	237505	124773	1.42625e+06	2.04436e+06	212114	34704.2	267239	188279
	TRUE	5-Boc-Octahydropyrrolo[3,4-c]pyridine	C12 H22 N2 O2	Full match	No results	No results	Full match	No results	-0.54	226.16801	7.546	1121847.953	198	0	0				No matches found	No matches found	No matches found	No matches found	No MS2	[M+H]+1	51966.8	52863.7	455561	36499.9	55809.7	75760.6	69174.9	50873.3	58793.3	355472	62239.5	268282	54182	103869	613307	52702.4	48728.1	62952.9	52529.7	43038.8	51328.2	144302	32442.1	54928.3	53690.2
	TRUE	Malondialdehyde	C3 H4 O2	Full match	No results	No results	Full match	No results	-1.65	72.02101	14.428	540483.8063	20	0	0				No matches found	No matches found	No matches found	No matches found	No MS2	[M+H]+1	81929.8	87678.6	109421	103876	81111	101028	104840	105384	106529	123603	91270.3	540484	101005	75272.6	105415	142963	85788.4	101874	105343	82112.5	141043	113670	43896.7	153011	166350
	TRUE		C13 H22 F N S	Invalid mass	No results	No results	No match	No results	3.07	243.14645	24.411	3745834.408	230	0	0				No matches found	No matches found	No matches found	No matches found	No MS2	[M+H]+1	413205	427728	337575	412977	383417	401822	389093	385623	377579	371364	385899	403184	398903	406478	428216	411488	438492	427690	432229	3.74583e+06	398112	412208	414117	385069	349994
	TRUE	tert-Butyl 2-isopropyl-4-oxopiperidine-1-carboxylate	C13 H23 N O3	Full match	No results	No results	Full match	No results	-0.96	241.16756	12.18	1244483.889	152	0	0				No matches found	No matches found	No matches found	No matches found	No MS2	[M+H]+1	71618.7	54018.7	39061.3	179645	50187.3	49581.3	88678.7	44471.2	315897	72300.5	35759.2	46658.3	49098.5	82412.9	58398.6	50374.2	50292.7	53653.2	50218.7	54397.5	45946.4	38074.3	46585.8	78211.3	49916
	TRUE		C H6 F P3 S3	Invalid mass	No results	No results	Unused	No results	3.19	225.88357	10.494	1335406.006	2	0	0				No matches found	No matches found	No matches found	No matches found	No MS2	[M+H]+1	49128.4	71097.2	107761	92299.1	84990.1	66320.6	61905.6	100629	112079	85234	216509	71490.5	53283.9	68139.2	1.33541e+06	779584	337176	70686.8	66099	76324.9	60657.4	73708.7	639342	81077.3	74766.4
	TRUE	Furfural	C5 H4 O2	Full match	No results	No results	Full match	No results	-0.12	96.02112	8.205	669556.2123	15	0	0				No matches found	No matches found	No matches found	No matches found	DDA for other ion	[M+H]+1	44355.3	46957.4	53854.2	30437.7	131188	64517.2	46026.3	44863.6	45858.7	60540.7	45992.4	51730.9	669556	280905	45950	50794.4	51815.2	52612.3	62648.3	79509.6	33120.3	45997.1	44745.6	47975.8	46374.7
	TRUE		C5 H12 N4 O Si	Full match	No results	No results	No match	No results	-0.48	172.07795	10.409	1061848.429	18	0	0				No matches found	No matches found	No matches found	No matches found	No MS2	[M+H]+1	34325.9	47605.7	34524.4	54870.1	54293.3	55581.5	46069.4	47339	37966.6	47449.6	549230	69144	55388.8	49816.7	1.06185e+06	84822.5	213542	38778.5	66933.6	47872	45566.9	52239.9	186220	51882.8	53080.1
	TRUE		C18 H46 F N9 O2	Full match	No results	No results	No match	No results	2.8	439.37708	19.448	3236403.726	9	0	0				No matches found	No matches found	No matches found	No matches found	No MS2	[M+H]+1	203595	241331	295249	138684	207595	337929	157462	224892	210740	114710	178713	129982	245408	165710	204608	3.2364e+06	297936	497178	143924	356461	320849	263493	217851	164896	245201
	TRUE	3,5-DIMETHYLPYRAZOL-1-METHANOL	C6 H10 N2 O	Full match	No results	No results	Full match	No results	-1	126.07919	9.677	674084.4255	187	0	0				No matches found	No matches found	No matches found	No matches found	DDA for preferred ion	[M+H]+1	51646.6	165745	263739	78645.8	52449.9	62641.1	52773.1	450233	50943.1	27026.5	47982.4	49681.1	46890.6	54780	49079.6	49134.6	54678.5	32370.7	51153.2	68681.9	50825.8	39998	49356.3	69842.1	51148.4
	TRUE	Adenine	C5 H5 N5	Full match	No results	No results	Full match	No results	0.4	135.05455	8.191	613533.6854	66	0	0				No matches found	No matches found	No matches found	No matches found	DDA for preferred ion	[M+H]+1	53226.4	56348.8	51265.5	20404	120532	278808	56235.6	613534	71627.5	53181.4	55006.8	62077.1	59964.6	63924.8	55140	63577.5	59784.9	62244.2	177673	60443.4	38703.1	55864.6	61250.5	94320.6	53503.5
	TRUE	2-Carbethoxycyclopentanone	C8 H12 O3	Full match	No results	No results	Full match	No results	1.91	156.07894	2.728	550898.5045	601	0	0				No matches found	No matches found	No matches found	No matches found	DDA for preferred ion	[M+H]+1	134712	100958	60361.9	411082	294808	40540.6	47017.5	129770	550899	33022.3	87586.7	180158	106511	125070	86151.8	167652	141380	38902.4	70293.5	40046.3	171151	54416.6	127178	29449.9	36767.3
	TRUE	Ethyl 2-Cyclohexanoneacetate	C10 H16 O3	Invalid mass	No results	No results	Invalid mass	No results	-3.07	184.10938	0.511	1581253.727	674	0	0				No matches found	No matches found	No matches found	No matches found	DDA for preferred ion	[M+H]+1	123496	282437	171288	1.05309e+06	200406	397867	94313.2	381109	1.58125e+06	377153	211731	259264	178361	180015	137481	186648	133189	85931.8	333547	118167	513423	506264	159708	362612	476749
	TRUE	Ethyl 2-Cyclohexanoneacetate	C10 H16 O3	Full match	No results	No results	Full match	No results	-2.8	184.10943	0.648	1209399.685	674	0	0				No matches found	No matches found	No matches found	No matches found	DDA for preferred ion	[M+H]+1	260345	117925	71563.9	60201	285716	65477.4	52280.5	464307	260031	78835.3	158836	156318	90946.1	96700.1	227028	65678.1	72757.5	742286	144470	33980.4	100739	45256.7	146034	269120	276708
	TRUE		C18 H40 F N7 O3	Invalid mass	No results	No results	No match	No results	4.2	421.31944	22.046	1984367.966	11	0	0				No matches found	No matches found	No matches found	No matches found	No MS2	[M+H]+1	264374	1.59931e+06	357901	1.04517e+06	528909	325906	184900	153685	189645	150889	162671	246823	1.80731e+06	1.4973e+06	183434	481573	149464	130818	386824	164203	754187	1.98437e+06	289566	1.71667e+06	236164
	TRUE	methylpiperazine	C5 H12 N2	Full match	No results	No results	Full match	No results	-1.05	100.09994	7.607	660472.1535	89	0	0				No matches found	No matches found	No matches found	No matches found	No MS2	[M+H]+1	335313	41545.1	55036.9	48712.1	38874.8	45413.2	39168.8	46043.1	40278.2	45317.4	42350.7	42956.8	39181.6	39380.7	660472	154705	41524	43926	37795	42470.4	38029.7	46160.5	46528.5	39888.1	38952.9
	TRUE	Bethanidine	C10 H15 N3	Full match	No results	No results	Full match	No results	-0.3	177.12654	7.645	309917.8995	138	0	0				No matches found	No matches found	No matches found	No matches found	No MS2	[M+H]+1	120383	34048.9	35476.9	31912.2	28611.5	35728.5	30049.4	30836.2	27721.9	34058.3	67374.4	31717.2	28233.1	28042.1	309918	32164.9	29218.2	32489.2	27282.7	30089.9	27006.3	30402.7	58138.5	29453.6	193679
	TRUE	Valpromide	C8 H17 N O	Full match	No results	No results	Full match	No results	-0.99	143.13087	7.788	694536.5096	341	0	0				No matches found	No matches found	No matches found	No matches found	No MS2	[M+H]+1	41580	52484.2	79910.1	71971.1	46271.1	45168.2	49790	301343	178895	53538.8	91821.6	51779.1	51071.8	47090.6	694537	51531.8	36000.9	292661	224539	50751.1	67935.9	36066.6	53071.6	196804	106435
	TRUE	Lauramine	C12 H25 N O	Full match	No results	No results	Full match	No results	-0.92	199.19343	14.999	2075278.291	97	0	0				No matches found	No matches found	No matches found	No matches found	No MS2	[M+H]+1	130364	50830.9	192191	71495.1	68321.2	85153.3	69664.8	66348.2	76856.4	69553.6	59414.9	63087.4	77271.4	62303.5	63831.6	218070	61126.4	181063	149639	76376.5	70813.6	275404	236935	83512.9	559433
	TRUE	[(1E)-3,4-Dimethyl-1-pentenyl](fluoro)dimethylsilane	C9 H19 F Si	Full match	No results	No results	Full match	No results	-1.28	174.12378	6.998	1875050.615	1	0	0				No matches found	No matches found	No matches found	No matches found	No MS2	[M+H]+1	238811	898733	63944.8	1.49696e+06	116176	71414.2	82325	96459.8	1.6427e+06	80678	64240.6	415362	1.01267e+06	1.87505e+06	67432.8	121342	1.60698e+06	71070.6	109093	65972.7	294772	86407.6	77560.8	107574	65833.7
	TRUE		C H6 F N2 O4 P	Full match	No results	No results	Invalid mass	No results	-2.19	160.00457	7.679	514255.1372	53	0	0				No matches found	No matches found	No matches found	No matches found	No MS2	[M+H]+1	40803.9	40259	514255	155936	42549.8	34391.8	48002.3	45098.7	47729.5	51908.4	317187	36310.1	44638.2	43911.8	44428.8	49103.3	41867.1	38839.8	41826.5	120209	140982	48392.1	55177	50904	107673
	TRUE		C17 H38 F2 N10	Invalid mass	No results	No results	No match	No results	-4.08	420.32318	22.382	2113109.389	15	0	0				No matches found	No matches found	No matches found	No matches found	No MS2	[M+H]+1	1.54657e+06	122991	474039	216093	128066	167323	287550	116742	121080	272674	126032	122684	134746	384621	161812	117002	123156	635037	657617	118348	355577	220374	880660	257959	119019
	TRUE	Paracetamol	C8 H9 N O2	Full match	No results	No results	Full match	No results	0.52	151.06341	14.79	1226440.026	494	0	0				No matches found	No matches found	No matches found	No matches found	No MS2	[M+H]+1	1.22644e+06	137420	111723	92633	136921	139455	147516	154945	127547	182175	110115	109374	86272.2	153427	79158.7	81046.1	117555	125562	179581	132108	128009	130148	150084	157689	177860
	TRUE		C13 H31 N5 O3	Full match	No results	No results	No match	No results	0.67	305.2429	16.619	1650791.035	1	0	0				No matches found	No matches found	No matches found	No matches found	No MS2	[M+H]+1	152028	1.65079e+06	315475	110113	111540	109950	107097	114028	92705.1	264511	1.60019e+06	1.22179e+06	148446	83804.4	111267	1.39891e+06	889211	1.19975e+06	126466	1.28603e+06	231316	113862	111811	75114.5	979683
	TRUE	Ethyl 2-Cyclohexanoneacetate	C10 H16 O3	Full match	No results	No results	Full match	No results	-1.82	184.10961	2.8	3245492.279	674	0	0				No matches found	No matches found	No matches found	No matches found	DDA for preferred ion	[M+H]+1	660285	84211.6	187733	468441	210479	166365	1.56065e+06	257025	198988	175969	505924	438227	297942	355029	414000	222562	203216	67646.3	207287	111018	241013	463646	325810	393550	1.19113e+06
	TRUE	Glutarimide	C5 H7 N O2	Full match	No results	No results	Full match	No results	-0.61	113.04761	0.422	6396290.427	139	0	0				No matches found	No matches found	No matches found	No matches found	No MS2	[M+H]+1	124837	142884	130433	2.21338e+06	173555	136018	3.47481e+06	107666	3.45743e+06	174060	170657	125603	145487	131860	112843	137212	128104	2.34053e+06	138727	144031	113343	134318	134313	139001	91126
	TRUE		C16 H37 F2 N5 O3	Full match	No results	No results	No match	No results	1.31	385.28695	21.123	6009972.581	1	0	0				No matches found	No matches found	No matches found	No matches found	No MS2	[M+H]+1	145991	138080	124444	202679	128751	131122	175851	167161	6.00997e+06	175436	207397	133746	191219	133916	202240	109815	233236	121221	119424	131072	150318	2.60549e+06	251408	153785	352311
	TRUE		C13 H31 N5 O3	Full match	No results	No results	No match	No results	0.15	305.24274	16.567	1600185.213	1	0	0				No matches found	No matches found	No matches found	No matches found	No MS2	[M+H]+1	608514	1.58528e+06	173787	163086	164406	166112	161310	156893	132307	202067	1.60019e+06	1.3776e+06	323376	195996	1.07955e+06	1.39891e+06	853077	425770	311134	1.1064e+06	138211	162185	533935	155965	149613
	TRUE		C53 H98 N9 O2 P3 S	Full match	No results	No results	Invalid mass	No results	0.19	1017.6779	18.197	1430606.204	2	0	0				No matches found	No matches found	No matches found	No matches found	No MS2	[M+2H]+2	166295	142702	134062	118952	142448	146620	119859	136665	126574	149046	117242	451185	146707	377728	145666	139635	375597	128318	858591	148351	1.43061e+06	126846	147318	430587	129772
	TRUE	Ethyl 2-Cyclohexanoneacetate	C10 H16 O3	Full match	No results	No results	Full match	No results	-2.97	184.1094	0.595	1002220.894	674	0	0				No matches found	No matches found	No matches found	No matches found	DDA for preferred ion	[M+H]+1	57464.4	91332	75845	124193	285716	105940	96388.1	58483	115969	105889	91244.6	104227	83047	186259	84377.3	133835	55670.3	682112	102052	50099.6	406459	166452	211191	81785.9	129206
	TRUE	3-(1-Piperidinyl)-2,2-bis(1-piperidinylmethyl)-1-propanol	C20 H39 N3 O	Full match	No results	No results	Full match	No results	-1.16	337.30892	19.743	2352489.085	8	0	0				No matches found	No matches found	No matches found	No matches found	No MS2	[M+H]+1	1.02863e+06	168936	156659	76556.4	583584	164558	250091	160606	455892	299855	168035	2.35249e+06	110973	1.52641e+06	404468	227135	234603	291568	174723	158000	179290	546656	271019	174983	1.43664e+06
	TRUE		C H3 O2 P S2	Full match	No results	No results	No match	No results	-0.82	141.93109	2.034	571567.5991	1	0	0				No matches found	No matches found	No matches found	No matches found	No MS2	[M+H]+1	134956	266027	160423	328538	241280	287780	79695.8	158865	394894	136767	259271	85909	424295	128696	207107	365751	180028	141876	304131	267914	571568	373272	65685.1	170600	139528
	TRUE	trimethadione	C6 H9 N O3	Full match	No results	No results	Full match	No results	0.1	143.05826	25.242	1325570.341	245	0	0				No matches found	No matches found	No matches found	No matches found	No MS2	[M+H]+1	535870	626534	160143	96051	155930	82371.6	175518	1.06187e+06	160711	162053	685247	126512	450448	101804	1.32557e+06	96406.9	362633	261460	502273	167143	1.02321e+06	180833	126910	178839	164117
	TRUE	Jasmonal	C14 H18 O	Full match	No results	No results	Full match	No results	-0.77	202.13561	12.988	2081627.359	351	0	0				No matches found	No matches found	No matches found	No matches found	DDA for preferred ion	[M+H]+1	45500.7	686025	123432	1.3811e+06	152974	165958	262161	194998	87859.2	222849	190475	301728	124638	131350	133610	152476	177929	270397	750042	208348	123334	987948	527380	150972	126560
	TRUE	(3R,4R)-1-Benzyl-N,4-dimethylpiperidin-3-amine	C14 H22 N2	Full match	No results	No results	Full match	No results	0.3	218.17836	9.146	258509.2898	158	0	0				No matches found	No matches found	No matches found	No matches found	No MS2	[M+H]+1	36555.4	36759.6	32692	32965.6	37389.8	37546.5	32404.3	32225	149130	38946.8	32805.8	36580.6	26646.7	33763.4	32873.2	36733	34514.4	133937	37467.5	81746	34237.8	32422.6	34482.9	36597.9	36340.3
	TRUE	Cyclopentane	C5 H10	Full match	No results	No results	Full match	Full match	-0.14	70.07824	20.245	2114518.539	16	0	0				No matches found	No matches found	No matches found	Single match found	No MS2	[M+H]+1	159743	158256	157611	209688	337511	214034	182440	193618	155877	2.11452e+06	144312	188490	460799	217564	153717	199476	419985	159072	247206	157787	193780	198595	198896	198876	272245
	TRUE		C18 H43 N10 O2 P	Invalid mass	No results	No results	Invalid mass	No results	3.3	462.33233	22.63	3879473.189	24	0	0				No matches found	No matches found	No matches found	No matches found	No MS2	[M+H]+1	133471	135140	265031	158813	133963	216441	179386	127172	123400	3.87947e+06	135859	127961	139283	141980	311309	127664	181545	143545	143874	123767	154278	368232	127486	193523	127011
	TRUE	Pyrazol-5-ol	C3 H4 N2 O	Full match	No results	No results	Full match	No results	-0.97	84.03228	25.162	1053944.531	38	0	0				No matches found	No matches found	No matches found	No matches found	No MS2	[M+H]+1	298241	1.05394e+06	298301	162790	330035	181936	93457.8	149383	158493	316267	163321	164903	165133	810428	165454	120445	164870	145416	150603	153467	159550	73163.8	125924	165702	102069
	TRUE	n,n,n′-tri-sec-butylbenzene-1,4-diamine	C18 H32 N2	Full match	No results	No results	Full match	No results	0.95	276.25681	19.814	2192802.471	25	0	0				No matches found	No matches found	No matches found	No matches found	No MS2	[M+H]+1	196175	246694	1.2157e+06	202993	250575	236208	267768	313056	190328	284494	229689	205778	277066	191088	1.30845e+06	191330	316847	212749	265669	222325	1.5526e+06	212742	222835	201051	2.1928e+06
	TRUE		C H6 F P3 S3	Full match	No results	No results	Unused	No results	2.76	225.88347	11.011	681799.9778	2	0	0				No matches found	No matches found	No matches found	No matches found	No MS2	[M+H]+1	150249	48069.4	68464.8	75334.3	51574.8	119914	72010.4	70617.2	45999.8	98318	77815.3	210922	96344.1	88358.8	56710.6	79374.7	83224.1	681800	91396.6	71646.6	68727.6	63270.2	260662	376439	88845.7
	TRUE	1,1,1-Trifluoro-3-octyn-2-one	C8 H9 F3 O	Full match	No results	No results	Full match	No results	1.04	178.06073	0.683	1294053.499	4	0	0				No matches found	No matches found	No matches found	No matches found	No MS2	[M+H]+1	116474	84786.4	84028.6	312045	55163.8	101355	60583.9	136430	106011	48458.2	77703.2	73337.5	85820.7	65025.7	1.29405e+06	981640	47249.1	147095	56389.8	54949.5	51192	52243.9	68906.4	59436.8	67316.5
	TRUE	Ethyl linolelaidate	C20 H36 O2	Full match	No results	No results	Full match	No results	0.97	308.27183	24.375	3286242.178	118	0	0				No matches found	No matches found	No matches found	No matches found	No MS2	[M+H]+1	303494	300691	295355	317660	286572	290077	288520	304199	264173	294361	244294	270482	3.28624e+06	291109	286849	284506	360890	2.64443e+06	308999	303113	297355	294032	283620	283965	283838
	TRUE	Cyclopentane	C5 H10	Full match	No results	No results	Full match	Full match	-0.29	70.07823	21.742	2668959.087	16	0	0				No matches found	No matches found	No matches found	Single match found	No MS2	[M+H]+1	141385	139093	247355	1.04157e+06	231679	2.66896e+06	185225	134522	297459	781272	290251	239506	140203	128456	2.42936e+06	254223	139936	258258	131890	1.40243e+06	922533	213673	169024	298350	1.53061e+06
	TRUE	2-Carbethoxycyclopentanone	C8 H12 O3	Full match	No results	No results	Full match	No results	2.87	156.07909	3.369	301896.0736	601	0	0				No matches found	No matches found	No matches found	No matches found	DDA for preferred ion	[M+H]+1	74624.5	54456.8	57575	185681	110567	120400	102539	69878.1	301896	117782	48798	129920	261162	121055	55352.1	62701	104815	101653	59058	60073	128810	65515.6	60743.5	55637.7	82818.7
	TRUE		C H6 F P3 S3	Full match	No results	No results	Unused	No results	2.8	225.88348	11.369	584319.2017	2	0	0				No matches found	No matches found	No matches found	No matches found	No MS2	[M+H]+1	31948.1	63288.3	79422.6	77262.4	584319	273257	50396.1	406219	77980.5	52637.9	66334.8	487487	78569.2	46963.9	341746	91212.2	251576	247688	65467.8	105212	76146.4	202398	89497.4	87473.8	124154
	TRUE		C17 H45 N7 O P2	Invalid mass	No results	No results	Invalid mass	No results	3.35	425.31751	18.742	2854267.57	1	0	0				No matches found	No matches found	No matches found	No matches found	No MS2	[M+H]+1	262938	198121	343591	142679	134714	137852	143825	148906	134368	180884	243407	270294	2.61184e+06	324668	179242	237559	300068	499498	196530	266536	203340	289258	247248	400068	2.85427e+06
	TRUE	[(1E)-3,4-Dimethyl-1-pentenyl](fluoro)dimethylsilane	C9 H19 F Si	Full match	No results	No results	Full match	No results	-1.28	174.12378	18.959	5536964.425	1	0	0				No matches found	No matches found	No matches found	No matches found	No MS2	[M+H]+1	677730	1.04137e+06	223528	244863	208614	379316	72323.8	121316	1.19958e+06	129661	138652	136075	475884	2.54245e+06	544570	131603	122188	121044	121580	85784	119473	5.53696e+06	3.4981e+06	4.00179e+06	231217
	TRUE	Ethyl 2-Cyclohexanoneacetate	C10 H16 O3	Full match	No results	No results	Full match	No results	-1.15	184.10973	2.283	1029974.231	674	0	0				No matches found	No matches found	No matches found	No matches found	No MS2	[M+H]+1	304977	50720.4	155215	93696.4	108189	51864.4	55936.6	95864.2	173956	254565	72463.4	179945	311075	1.02997e+06	148295	143395	163324	321385	226486	74145.2	203609	183044	80193.9	55234	91636.9
	TRUE		C8 H16 S Si	Full match	No results	No results	No match	No results	-2.71	172.07373	1.489	1378062.55	425	0	0				No matches found	No matches found	No matches found	No matches found	No MS2	[M+H]+1	77366.5	406143	72904.8	551776	108916	88757.7	55121.5	141126	349164	97503.3	73129.8	148591	1.37806e+06	156160	133788	88878.4	102389	364463	189587	125462	163682	533884	56678.4	522400	147877
	TRUE	Cyclopentane	C5 H10	Full match	No results	No results	Full match	Full match	0.29	70.07827	19.777	1581945.683	16	0	0				No matches found	No matches found	No matches found	Single match found	No MS2	[M+H]+1	164026	179940	788212	164438	237153	1.58195e+06	187942	222849	254405	395886	180664	404724	1.36123e+06	176194	209818	1.00912e+06	181083	184995	175336	236086	1.47611e+06	234044	950956	183119	813475
	TRUE	3-(1-Piperidinyl)-2,2-bis(1-piperidinylmethyl)-1-propanol	C20 H39 N3 O	Full match	No results	No results	Full match	No results	-1.14	337.30893	19.707	2346174.296	8	0	0				No matches found	No matches found	No matches found	No matches found	No MS2	[M+H]+1	1.02863e+06	330291	543074	308293	519078	1.03517e+06	383928	1.95325e+06	147078	303384	479009	2.34617e+06	1.33213e+06	1.52641e+06	725921	289656	1.45396e+06	354903	453741	417971	1.76007e+06	379517	379306	785098	1.43664e+06
	TRUE		C16 H37 F2 N5 O3	Full match	No results	No results	No match	No results	0.8	385.28675	21.605	2982510.352	1	0	0				No matches found	No matches found	No matches found	No matches found	No MS2	[M+H]+1	147480	172852	177860	121468	120156	156943	130235	176366	134175	130906	173367	1.1262e+06	81860.9	139987	132040	119886	129390	132184	142912	166395	141302	149005	2.98251e+06	136104	128939
	TRUE	Ethyl 2-Cyclohexanoneacetate	C10 H16 O3	Full match	No results	No results	Full match	No results	-2.98	184.1094	4.773	3283730.115	674	0	0				No matches found	No matches found	No matches found	No matches found	DDA for preferred ion	[M+H]+1	58080.8	136610	55466.3	248827	1.04252e+06	58972.5	182787	536240	3.28373e+06	653070	56622.1	231661	368756	139093	87614	176613	77261	66181.2	326202	351673	447353	72626	66471.2	53303.4	168839
	TRUE		C16 H37 F2 N5 O3	Full match	No results	No results	No match	No results	0.92	385.2868	21.594	3303886.396	1	0	0				No matches found	No matches found	No matches found	No matches found	No MS2	[M+H]+1	132392	185180	177860	127983	159067	99086.6	133657	219352	123039	129987	141839	149397	147602	122759	138406	3.30389e+06	1.57294e+06	139794	186363	166395	254554	138130	264190	264665	125229
	TRUE	Diethyl fumarate	C8 H12 O4	Full match	No results	No results	Full match	No results	-0.7	172.07344	1.464	1253149.371	426	0	0				No matches found	No matches found	No matches found	No matches found	No MS2	[M+H]+1	91161.6	73006.6	91152.9	78292.7	70180.5	61243.2	88725.3	137472	88256.7	83764.8	111102	111005	169615	119207	133788	159617	57396.7	335441	206572	113195	152897	118560	327556	522400	147877
	TRUE		C19 H43 F N6 O	Full match	No results	No results	No match	No results	2.46	390.3492	22.475	1721476.383	24	0	0				No matches found	No matches found	No matches found	No matches found	No MS2	[M+H]+1	182922	442459	356535	74879.6	143088	267967	142135	120726	176883	174785	181993	183339	183728	192982	102119	182810	197466	189778	282232	390987	967131	183941	313238	199263	168274
	TRUE		C15 H42 F N10 O2 P	Full match	No results	No results	Invalid mass	No results	1.78	444.32218	19.514	13748481.44	45	0	0				No matches found	No matches found	No matches found	No matches found	No MS2	[M+H]+1	176833	191226	293215	210073	206562	442296	282896	216106	119568	206490	249216	227926	248145	212342	223007	210808	205081	291695	279665	257464	197573	228476	245247	247374	198679
	TRUE		C19 H41 F N6 O	Full match	No results	No results	No match	No results	2.46	388.33354	21.565	16021736.22	37	0	0				No matches found	No matches found	No matches found	No matches found	No MS2	[M+H]+1	583606	624920	751222	565649	502663	2.40006e+06	618692	596659	607131	586963	197597	554654	639877	646225	770931	583199	517724	683069	621076	201368	557643	628091	799886	439583	516006
	TRUE		C13 H34 F N7	Invalid mass	No results	No results	No match	No results	4.6	307.28738	18.656	1081144.805	19	0	0				No matches found	No matches found	No matches found	No matches found	No MS2	[M+H]+1	105805	124897	124625	100134	180734	48488	77637.2	120243	185047	573471	203574	108922	342353	641330	53665.6	309251	124198	237015	109561	122485	523959	65834.6	108860	104619	112320
	TRUE	Ethyl acetate	C4 H8 O2	Full match	No results	No results	Full match	Full match	-0.45	88.05239	1.771	976581.4096	87	0	0				No matches found	No matches found	No matches found	Single match found	No MS2	[2M+NH4]+1	89038.1	80859.8	117057	46463.5	43129.7	37654.9	92094.1	238285	33626.3	267708	226474	89531.6	158062	73906.1	99340.6	91215.4	238603	83155.1	976581	36100.7	144702	158790	59453.6	57863.6	101639
	TRUE		C H2 F2 I P S Si2	Full match	No results	No results	No match	No results	0.19	297.81667	0.433	1638835.73	1	0	0				No matches found	No matches found	No matches found	No matches found	No MS2	[M+H]+1	203701	132691	74714	115681	104217	127098	75071.7	121485	56662.3	357233	80704.3	1.63884e+06	522640	124973	262512	80057.2	163627	722022	478953	115481	115548	98386.6	1.53833e+06	60653.3	107066
	TRUE	3,3-Dimethyl-1,5-dioxaspiro[5.5]undecan-9-one	C11 H18 O3	Full match	No results	No results	Full match	No results	-1.05	198.12539	7.025	4317926.476	468	0	0				No matches found	No matches found	No matches found	No matches found	DDA for preferred ion	[M+H]+1	665003	179553	124045	145133	421625	82920	63658.5	432237	4.31793e+06	306257	151599	504210	144128	109065	143172	78957.4	69411.5	256248	148534	205510	67854.2	189204	299367	663067	257519
	TRUE	Diethyl sebacate	C14 H26 O4	Full match	No results	No results	Full match	No results	-0.54	258.18297	19.129	2068044.395	210	0	0				No matches found	No matches found	No matches found	No matches found	No MS2	[M+H]+1	1.6548e+06	160630	167787	244377	113182	161312	165508	188155	162704	169357	1.14358e+06	737210	168849	161487	171338	2.06804e+06	177818	157897	178661	232967	166936	165218	170221	168622	175814
	TRUE		C H Cl2 F N4	Invalid mass	No results	No results	Invalid mass	No results	-4.14	157.95558	11.012	1300260.407	1	0	0				No matches found	No matches found	No matches found	No matches found	No MS2	[M+H]+1	159347	66118.3	504002	66472.6	45034.2	56453	64876.4	154325	64312.2	48827.5	69746.8	1.09719e+06	322997	464480	49056.2	56206	69384.2	59722	189116	50850.2	1.30026e+06	59194.8	205362	45155.6	64740.6
	TRUE	Butyric anhydride	C8 H14 O3	Full match	No results	No results	Full match	No results	-0.76	158.09417	14.243	807199.9378	666	0	0				No matches found	No matches found	No matches found	No matches found	No MS2	[M+H]+1	53461.6	110552	74389.6	66499.4	50543.2	65637.2	67997.4	72205.3	83465.9	88402.1	81661.5	68007.1	67153	63374.1	67775	549825	76121.3	70403.5	221978	54934.1	66342.2	68860.3	55622.8	73346.5	158299
	TRUE	Lauric acid	C12 H24 O2	Full match	No results	No results	Full match	Full match	-0.71	200.17749	20.17	3445495.029	362	0	0				No matches found	No matches found	No matches found	Single match found	No MS2	[M+H]+1	181769	195612	174805	201271	218871	396718	160082	280467	156465	80973.9	192770	200807	94769.5	198213	197081	187952	190857	197518	191896	191352	252870	211361	83202.6	185998	188512
	TRUE	2-Carbethoxycyclopentanone	C8 H12 O3	Full match	No results	No results	Full match	No results	2.28	156.079	2.867	288000.9679	601	0	0				No matches found	No matches found	No matches found	No matches found	DDA for preferred ion	[M+H]+1	85522.7	56151.3	33890.7	33969	56293.8	172849	77767.4	50364.5	152287	46550.6	141428	196261	43463.6	58590.4	200581	118635	168029	31183.3	54512.1	57495.5	288001	114320	38218.6	46784.7	43668.8
	TRUE		C14 H34 F3 N9	Invalid mass	No results	No results	Invalid mass	No results	-4.75	385.2871	22.715	2095366.83	1	0	0				No matches found	No matches found	No matches found	No matches found	No MS2	[M+H]+1	178243	210817	170801	211771	184808	252888	165341	2.09537e+06	157805	175637	145399	280805	220316	168997	177042	161017	173293	167785	176461	153836	419974	1.78818e+06	183024	166126	165316
	TRUE	valdipromide	C11 H23 N O	Full match	No results	No results	Full match	No results	-0.56	185.17786	11.038	810993.0664	122	0	0				No matches found	No matches found	No matches found	No matches found	No MS2	[M+H]+1	310936	42595.4	145786	50114.4	55042.8	59713.9	52461	107068	48448.5	55027.3	97239.9	160143	53029.8	56496.9	56786.2	84735.8	62347.1	52071.2	65060.7	47312.5	221413	53149.1	138157	58837.3	165946
	TRUE	1-tetradecyl-5-oxopyrrolidine-3-carboxylic acid	C19 H35 N O3	Full match	No results	No results	Full match	No results	-0.39	325.26157	18.92	1893058.686	34	0	0				No matches found	No matches found	No matches found	No matches found	No MS2	[M+H]+1	375157	1.26136e+06	1.60901e+06	325620	136135	185598	134072	138627	234429	209847	90785	336538	190255	1.5381e+06	1.70644e+06	131390	127910	143744	181786	849336	146774	1.89306e+06	136747	135561	380031
	TRUE	Adenine	C5 H5 N5	Full match	No results	No results	Full match	No results	0	135.0545	8.521	548434.4911	66	0	0				No matches found	No matches found	No matches found	No matches found	DDA for preferred ion	[M+H]+1	70611.6	46062.4	63273.9	63942.9	57973.5	54411.2	25133.5	151568	46777.9	98672.3	53272.8	54233.6	59655.8	61040.1	548434	55263.1	69443.1	74547.6	45049.7	155282	55052.8	154811	58777.3	44146.4	60656.7
	TRUE	Imidazole	C3 H4 N2	Full match	No results	No results	Full match	Full match	-0.35	68.03742	25.128	1383220.318	14	0	0				No matches found	No matches found	No matches found	Single match found	No MS2	[M+H]+1	870994	148317	140893	155978	1.17793e+06	136767	140086	187878	232030	1.20505e+06	203818	147552	1.17684e+06	157020	1.2827e+06	539342	466369	154079	1.07616e+06	144713	745680	152804	953354	575833	593653
	TRUE		C16 H44 N9 O P	Full match	No results	No results	No match	No results	0.72	409.34094	22.129	1215707.531	1	0	0				No matches found	No matches found	No matches found	No matches found	No MS2	[M+H]+1	180325	190084	180393	184242	153193	191274	198140	151519	229901	196920	172521	189486	202738	203503	86801.6	194585	706974	183763	182117	206436	189473	126214	301679	397923	181428
	TRUE	DIISOPROPYLANILINE	C12 H19 N	Full match	No results	No results	Full match	No results	-0.41	177.15168	8.378	468650.0191	192	0	0				No matches found	No matches found	No matches found	No matches found	No MS2	[M+H]+1	109587	55543.3	84923.5	96691	411009	468650	181150	74701	71262.5	71707.7	72536.3	79283	79926.5	87078.8	72596	83496.7	81362	70200.8	69950.5	79757.6	79961.1	80503.6	117504	71835.8	86184.5
	TRUE		C18 H44 F N8 O P	Full match	No results	No results	Unused	No results	-1.51	438.33531	20.478	2746189.937	6	0	0				No matches found	No matches found	No matches found	No matches found	No MS2	[M+H]+1	389515	238675	2.74619e+06	165310	1.38186e+06	97227.5	204181	2.08123e+06	221979	237836	200540	203465	214587	206002	215824	220309	223505	241623	197357	395968	209428	205067	222418	283242	146803
	TRUE		C17 H41 F N9 P	Full match	No results	No results	No match	No results	-2.07	421.31978	21.927	2364692.308	11	0	0				No matches found	No matches found	No matches found	No matches found	No MS2	[M+H]+1	210801	1.57796e+06	305878	292133	254861	1.8413e+06	288335	262080	339181	247537	1.81627e+06	270290	234822	242820	334253	217088	242381	252996	268588	250388	240473	373837	228797	242147	1.00074e+06
	TRUE		C14 H34 F3 N9	Invalid mass	No results	No results	Invalid mass	No results	-4.15	385.28733	21.648	965059.3337	1	0	0				No matches found	No matches found	No matches found	No matches found	No MS2	[M+H]+1	116493	819648	177860	109207	116424	278252	187236	165777	141972	121546	138679	116490	120270	417385	280351	120630	122236	119042	397621	118417	118882	119749	112720	122722	337571
	TRUE		C16 H43 F N9 O P	Invalid mass	No results	No results	No match	No results	-3.52	427.32972	19.648	4027387.141	10	0	0				No matches found	No matches found	No matches found	No matches found	No MS2	[M+H]+1	394503	405676	232955	190638	199897	217631	2.2843e+06	1.56364e+06	221585	225865	214635	192775	222839	379285	4.02739e+06	203950	390684	210677	215601	220668	232436	643100	226415	113935	241520
	TRUE	Ethyl levulinate	C7 H12 O3	Full match	No results	No results	Full match	No results	-0.84	144.07852	18.881	1176695.361	517	0	0				No matches found	No matches found	No matches found	No matches found	No MS2	[M+H]+1	112052	135280	108668	127801	109432	108467	124489	107231	120741	268457	114097	118414	124447	1.1767e+06	111111	95557	105151	109601	112506	103585	112240	131777	110995	104454	123438
	TRUE		C H3 O2 P S2	Full match	No results	No results	No match	No results	-0.39	141.93115	10.843	2657282.252	1	0	0				No matches found	No matches found	No matches found	No matches found	No MS2	[M+H]+1	129810	165004	177618	253824	152163	1.23614e+06	125285	173743	80325.6	149689	160457	559159	291655	169032	135733	141727	2.2687e+06	222189	176627	191310	2.65728e+06	128032	175780	151588	138035
	TRUE		C16 H37 F2 N5 O3	Full match	No results	No results	Invalid mass	No results	1.67	385.28709	22.524	1460811.968	1	0	0				No matches found	No matches found	No matches found	No matches found	No MS2	[M+H]+1	133971	393731	76232.3	107497	175206	144290	120101	326327	1.46081e+06	342237	152919	149091	157341	338736	279006	131347	143683	317493	539769	136719	153856	255570	144146	138664	143769
	TRUE		C20 H51 Cl N10 O4	Full match	No results	No results	No match	No results	-0.65	530.37798	20.243	1269964.22	1	0	0				No matches found	No matches found	No matches found	No matches found	No MS2	[M+H]+1	518776	135924	146005	191987	225934	1.26996e+06	396533	755086	214501	156015	133201	186920	1.26623e+06	135399	255284	1.04425e+06	155370	157977	193137	144468	136124	160388	145092	189868	135034
	TRUE		C16 H43 F N9 O P	Full match	No results	No results	No match	No results	-1.47	427.33059	18.812	1935315.109	10	0	0				No matches found	No matches found	No matches found	No matches found	No MS2	[M+H]+1	1.93532e+06	136304	98405.8	97207.9	80870.2	234912	98679.9	93772	97480.2	93761.3	90590.2	167176	119896	1.14685e+06	90164.7	88720.2	239892	95818.6	260854	87977.2	93648.7	1.6157e+06	97844.2	91048.7	101626
	TRUE	1,3,5-Norcaratriene	C7 H6	Full match	No results	No results	Full match	No results	-1.11	90.04685	20.797	2498042.705	17	0	0				No matches found	No matches found	No matches found	No matches found	No MS2	[M+H]+1	174035	164586	229180	164423	168946	166603	175504	175244	160923	162148	168340	236054	179959	170772	175662	172911	173212	162086	165935	171966	2.49804e+06	164622	162785	810248	172521
	TRUE	2-Carbethoxycyclopentanone	C8 H12 O3	Full match	No results	No results	Full match	No results	1.8	156.07893	2.064	250990.6815	601	0	0				No matches found	No matches found	No matches found	No matches found	DDA for preferred ion	[M+H]+1	64430.6	81295.8	34918	175622	146831	109047	38215.4	69833.1	17672.3	48389.1	42774.2	44975.1	48472.9	121437	38897.6	135418	68448	37771	67914.3	58047.5	101783	48681.1	104812	39320.1	90865.7
	TRUE	N-Dodecylacrylamide	C15 H29 N O	Full match	No results	No results	Full match	No results	-0.1	239.22489	17.056	1654915.797	79	0	0				No matches found	No matches found	No matches found	No matches found	No MS2	[M+H]+1	97877.4	174688	118638	544943	217228	1.37031e+06	1.65492e+06	76793.2	44542.1	230255	186667	196291	175072	127929	289032	198101	174553	100329	573699	166178	162162	1.63598e+06	335483	276687	141222
	TRUE		C12 H32 F N7 O2	Invalid mass	No results	No results	No match	No results	4.21	325.26152	19.043	1866021.549	34	0	0				No matches found	No matches found	No matches found	No matches found	No MS2	[M+H]+1	204017	1.26136e+06	1.58595e+06	94649.7	145049	126987	184449	171724	171627	161912	110218	164746	150072	1.56833e+06	166399	715868	218753	146505	182364	849336	1.29459e+06	1.86602e+06	223027	1.27731e+06	182444
	TRUE	Palmitic Acid	C16 H32 O2	Full match	No results	No results	Full match	No results	-0.3	256.24015	19.728	1344768.985	178	0	0				No matches found	No matches found	No matches found	No matches found	No MS2	[M+H]+1	103631	896186	150994	127865	244202	240022	127135	133970	116612	138944	132440	152784	123753	148105	123268	347284	126715	124975	106325	129343	132321	199529	309998	132778	126576
	TRUE	ARECOLINE	C8 H13 N O2	Full match	No results	No results	Full match	No results	0.16	155.09465	24.233	1715745.517	588	0	0				No matches found	No matches found	No matches found	No matches found	No MS2	[M+H]+1	128356	120887	167115	185006	147431	373948	129529	132370	131584	122810	1.17061e+06	138003	259117	131408	137420	351189	85963.6	132894	133131	124765	140368	180465	800714	137036	140813
	TRUE		C8 H16 S Si	Full match	No results	No results	No match	No results	-2.87	172.0737	0.985	1804093.874	425	0	0				No matches found	No matches found	No matches found	No matches found	DDA for preferred ion	[M+H]+1	83276.7	73081.1	90912.4	157278	1.80409e+06	65616.4	118261	158213	32247.2	51644.7	33943.6	195070	513816	73343.8	46044.7	69775.7	72093.6	161044	83260.7	60541.1	468368	336133	35343.3	86540.8	110871
	TRUE	4-Methoxyaniline	C7 H9 N O	Full match	No results	No results	Full match	No results	-0.79	123.06832	9.006	528206.3447	230	0	0				No matches found	No matches found	No matches found	No matches found	DDA for other ion	[M+H]+1	68033.2	156474	62663.9	34586.5	51201	57297.3	66370.7	68389.7	80141.5	89741.8	62599.6	134292	66262.7	50127.9	90404.8	76509.6	69232.8	62280.5	62076	123807	62157.3	45716.4	52294	46406.5	68306.1
	TRUE	Valpromide	C8 H17 N O	Full match	No results	No results	Full match	No results	-0.81	143.1309	10.285	692295.9283	341	0	0				No matches found	No matches found	No matches found	No matches found	No MS2	[M+H]+1	65276.6	83929.6	61792	84819.5	98177.4	69163.7	124617	74324.6	58033.1	112437	692296	104577	81514	73436.7	78850.7	122442	59939.7	68565.7	83021.2	383916	73392.5	414798	34269.3	26406.2	91229.9
	TRUE		C17 H38 F N7 O8	Full match	No results	No results	Invalid mass	No results	2.73	487.27792	21.519	2122292.086	5	0	0				No matches found	No matches found	No matches found	No matches found	No MS2	[M+H]+1	191504	265964	182808	1.45827e+06	184526	1.36642e+06	278112	140447	187967	188318	178136	181443	190155	193262	208197	181778	179599	171735	175098	292361	191460	219517	880012	201613	196386
	TRUE	2-Carbethoxycyclopentanone	C8 H12 O3	Full match	No results	No results	Full match	No results	2.46	156.07903	2.273	453315.5783	601	0	0				No matches found	No matches found	No matches found	No matches found	DDA for preferred ion	[M+H]+1	84877.5	124924	68903.6	189030	100946	98754.8	69730.9	73044.1	71908.4	105156	90333.3	109752	133343	260986	58310.9	70883.6	80549	65810.1	175510	69531.4	138585	453316	134055	69672.6	114235
	TRUE	(+)-Nootkatone	C15 H22 O	Full match	No results	No results	Full match	No results	-1	218.16685	24.244	1639011.167	401	0	0				No matches found	No matches found	No matches found	No matches found	No MS2	[M+H]+1	111118	122379	104899	164460	124233	150511	748352	1.63901e+06	117356	126062	115320	113675	116526	120118	117190	321514	106343	111983	132131	294203	120697	110448	115241	98467.8	106414
	TRUE		C H2 F2 I P S Si2	Full match	No results	No results	No match	No results	0.1	297.81664	0.777	985814.9846	1	0	0				No matches found	No matches found	No matches found	No matches found	No MS2	[M+H]+1	207037	164668	246569	226707	141393	244933	198334	153820	985815	63967.9	150360	202660	171622	218905	273183	199913	223298	209254	171388	392577	118964	272332	215343	142223	127844
	TRUE	2-Carbethoxycyclopentanone	C8 H12 O3	Full match	No results	No results	Full match	No results	2.93	156.0791	3.763	790692.2014	601	0	0				No matches found	No matches found	No matches found	No matches found	DDA for preferred ion	[M+H]+1	33637.1	297988	114113	790692	164625	147508	35374.2	46093.1	147288	115222	37117.6	33882.2	515443	102182	75783.6	49525.7	114286	148468	40704.1	35653.4	61429.8	46043.9	26239.4	76197.3	49045.5
	TRUE		C16 H37 F2 N5 O3	Full match	No results	No results	Invalid mass	No results	2.34	385.28735	23.15	1826877.844	1	0	0				No matches found	No matches found	No matches found	No matches found	No MS2	[M+H]+1	263653	258502	350001	271802	1.43001e+06	320339	244248	149726	243717	243515	201340	288849	288032	243285	263988	424885	251728	301088	270637	244798	1.82688e+06	342086	325504	271692	256501
	TRUE	Pentadecanedioic acid	C15 H28 O4	Full match	No results	No results	Full match	No results	-0.12	272.19873	19.396	2815851.727	173	0	0				No matches found	No matches found	No matches found	No matches found	No MS2	[M+H]+1	62932.2	112526	1.25018e+06	70462.2	121202	51789.1	112795	122854	2.81585e+06	125283	514391	105676	211390	195016	119506	106525	119232	121026	259595	120978	124800	79634.5	120018	120868	114653
	TRUE		C H7 N5 S Si	Full match	No results	No results	Invalid mass	No results	1.08	149.0193	19.536	6702810.978	1	0	0				No matches found	No matches found	No matches found	No matches found	No MS2	[M+H]+1	114891	113346	117669	86586.2	83274.8	155958	114811	151839	102138	118044	104059	145621	151190	120033	6.70281e+06	136448	121420	111747	151381	111890	115768	109086	118711	2.22026e+06	115032
	TRUE		C18 H47 F N9 O P	Full match	No results	No results	No match	No results	-2.43	455.36142	19.33	1839100.871	3	0	0				No matches found	No matches found	No matches found	No matches found	No MS2	[M+H]+1	130492	204473	149915	128400	140793	229600	134516	140981	129769	139653	169632	126621	126842	189202	129967	446425	225259	127713	145014	118842	137534	127926	1.8391e+06	173297	127853
	TRUE	Valpromide	C8 H17 N O	Full match	No results	No results	Full match	No results	-0.07	143.131	18.767	1600303.774	341	0	0				No matches found	No matches found	No matches found	No matches found	No MS2	[M+H]+1	221051	176135	123142	179167	156365	165835	214341	191804	200127	134736	140275	191411	239409	139735	141057	970200	128880	174460	131601	162681	342856	168074	647900	125768	234386
	TRUE	Furaneol	C6 H8 O3	Full match	No results	No results	Full match	No results	-0.44	128.04729	11.978	541438.9835	250	0	0				No matches found	No matches found	No matches found	No matches found	No MS2	[M+NH4]+1	80537.9	112402	86789.6	34731.3	107827	108234	66068.6	23220.2	72400.6	99461.6	107033	96315.8	104649	101276	57354	107400	104622	106249	98504.3	105701	90848.7	86689.1	67950.1	136155	101989
	TRUE		C H F I N S	Full match	No results	No results	Invalid mass	No results	1.69	204.88619	1.385	960312.7865	1	0	0				No matches found	No matches found	No matches found	No matches found	No MS2	[M+NH4]+1	167835	425010	167307	121417	99646.6	125327	398137	58639.5	153626	119859	176601	74755.3	185502	123723	118794	437755	161144	629272	712309	100708	960313	227626	214695	205677	236828
	TRUE		C17 H42 F N7 O4	Full match	No results	No results	No match	No results	2.76	427.32941	19.768	1730430.221	10	0	0				No matches found	No matches found	No matches found	No matches found	No MS2	[M+H]+1	202719	144826	1.73043e+06	143160	290638	81436.3	149640	1.59527e+06	156503	160948	157286	169395	159903	154134	156662	143292	147081	161056	218584	913471	153529	155843	164223	126241	88882.3
	TRUE		C17 H47 N10 O4 P	Full match	No results	No results	Invalid mass	No results	0.54	486.3522	21.385	3169305.631	8	0	0				No matches found	No matches found	No matches found	No matches found	No MS2	[M+H]+1	149131	155115	214417	140422	181857	105023	196083	144812	108701	143572	182720	147823	159863	166899	166653	325372	147349	146181	163832	145282	141406	108742	145680	150103	152012
	TRUE	Cyclopentane	C5 H10	Full match	No results	No results	Full match	Full match	-0.01	70.07825	18.705	1315121.12	16	0	0				No matches found	No matches found	No matches found	Single match found	No MS2	[M+H]+1	1.31512e+06	540564	155905	95478.9	622241	169786	441663	137354	138416	138343	186707	219599	155773	275421	387812	865832	143506	311683	516246	153336	1.06721e+06	146202	217591	141435	290689
	TRUE		C19 H45 F N5 O P3	Full match	No results	No results	Invalid mass	No results	2.52	471.28329	21.169	3011968.793	2	0	0				No matches found	No matches found	No matches found	No matches found	No MS2	[M+H]+1	145272	178030	163350	167886	161364	150590	161796	163960	154944	153084	151378	156451	153067	158875	206214	742494	390782	160322	146833	158867	162107	166191	157477	152905	173265
	TRUE	Decanamide	C10 H21 N O	Full match	No results	No results	Full match	No results	0	171.16231	24.206	2369731.103	184	0	0				No matches found	No matches found	No matches found	No matches found	No MS2	[M+H]+1	122965	191624	94246	411639	207287	228399	227951	198092	180821	176871	179387	175936	186863	196154	195801	190947	296463	182773	194441	134127	394738	193789	190897	192786	174924
	TRUE		C19 H34 F2 N4	Full match	No results	No results	Invalid mass	No results	-0.63	356.27493	20.412	4839424.383	6	0	0				No matches found	No matches found	No matches found	No matches found	No MS2	[M+H]+1	232708	2.31127e+06	181111	1.74225e+06	199027	2.32644e+06	172578	153700	208898	158694	264027	169751	157728	155253	223747	141904	4.83942e+06	167331	160590	541094	227108	171234	3.26864e+06	227810	165121
	TRUE	Acetaldehyde	C2 H4 O	Full match	No results	No results	Full match	Full match	-0.73	44.02618	1.855	1368856.748	6	0	0				No matches found	No matches found	No matches found	Single match found	No MS2	[M+NH4]+1	31251.7	152904	114037	74342.7	161886	138377	199233	55192.2	1.09251e+06	71485.6	87828.2	221208	101684	105137	86020.6	119459	29075.5	43541.7	240187	45946.6	113397	52085.7	139745	84992	156867
	TRUE		C16 H39 F N10	Full match	No results	No results	No match	No results	-1.62	390.33369	22.22	1085551.538	5	0	0				No matches found	No matches found	No matches found	No matches found	DDA for preferred ion	[M+H]+1	1.08555e+06	134622	540600	153549	139995	136211	235496	135093	131825	135566	129929	129992	136852	138623	128937	134074	301779	128917	124193	124787	261787	137336	128409	130654	130175
	TRUE		C H5 O2 P3 S2	Full match	No results	No results	Invalid mass	No results	1.41	205.89467	1.346	1071909.187	1	0	0				No matches found	No matches found	No matches found	No matches found	No MS2	[M+H]+1	111019	134470	173753	1.07191e+06	131845	113384	79352.2	115971	225139	114613	131753	720001	240796	387000	105509	380735	129268	190940	125789	169472	516673	480090	228388	34700.2	455125
	TRUE	Gabapentin	C9 H17 N O2	Full match	No results	No results	Full match	No results	-0.29	171.12588	17.131	2659954.826	526	0	0				No matches found	No matches found	No matches found	No matches found	No MS2	[M+H]+1	200058	207116	198044	181898	143644	189082	151666	1.81573e+06	176577	154536	1.33273e+06	196869	188342	148458	198026	195175	189998	200610	228614	195172	179853	204704	185233	213565	210849
	TRUE	(±)-Eucalyptol	C10 H18 O	Full match	No results	No results	Full match	No results	-0.83	154.13564	18.569	1192955.836	924	0	0				No matches found	No matches found	No matches found	No matches found	No MS2	[M+H]+1	85842.5	92250.5	88153.8	101050	108650	91471.5	99742.3	95273.8	93984.5	93462.4	81216.7	105614	91199	97672.1	126637	89126	84693.3	94438.3	93082.5	1.12814e+06	95099.6	96408.9	99287.1	99442.5	107169
	TRUE		C18 H44 F N7 O4	Full match	No results	No results	No match	No results	2.17	441.34484	18.407	1585663.01	11	0	0				No matches found	No matches found	No matches found	No matches found	No MS2	[M+H]+1	145928	146748	101314	101845	136748	135416	95780.2	98738.8	121715	93518.1	213291	133752	141365	121232	170041	411101	191156	106875	107236	91097.1	290809	154621	125395	157757	95225.9
	TRUE	3-(TRIMETHYLSILYLOXY)PROPIONITRILE	C6 H13 N O Si	Full match	No results	No results	Full match	No results	-0.19	143.07661	21.953	2247481.512	3	0	0				No matches found	No matches found	No matches found	No matches found	No MS2	[M+H]+1	317985	252527	210565	2.24748e+06	257225	229901	255510	124746	297241	306266	352613	236662	206118	358690	334605	269206	284426	287581	187712	249930	318191	211740	88767	98040.8	98128.8
	TRUE		C18 H47 F N9 P	Full match	No results	No results	No match	No results	-2.13	439.36667	18.686	2154093.796	15	0	0				No matches found	No matches found	No matches found	No matches found	No MS2	[M+H]+1	152953	162923	164499	1.88535e+06	210893	209393	149532	150852	1.2894e+06	209308	146327	242322	86570.9	1.22303e+06	762799	142929	166050	161234	163471	1.16264e+06	142350	192949	148316	136134	157654
	TRUE	methyprylon	C10 H17 N O2	Full match	No results	No results	Full match	No results	-0.61	183.12582	15.486	1382995.101	372	0	0				No matches found	No matches found	No matches found	No matches found	No MS2	[M+H]+1	122428	157792	120214	592669	76157.3	519032	139934	125922	77171.2	121955	89677.6	422379	161478	88260.5	106047	178094	102565	126226	118695	202701	112820	119200	345795	227828	508013
	TRUE		C18 H47 N7 O2 P2	Full match	No results	No results	No match	No results	0.16	455.32672	20.018	4069906.69	4	0	0				No matches found	No matches found	No matches found	No matches found	DDA for other ion	[M+H]+1	141187	133090	287820	397263	143564	134115	137173	84422	162071	133559	921979	138344	441436	147379	98147.9	138558	132533	135903	132565	520957	1.08129e+06	136323	600841	128107	208963
	TRUE		C18 H45 F N9 O2 P	Full match	No results	No results	No match	No results	-2.24	469.34074	24.028	1035863.313	3	0	0				No matches found	No matches found	No matches found	No matches found	No MS2	[M+H]+1	167259	184565	322707	225282	186460	140509	212716	179578	188747	940160	554394	178977	175490	184033	396436	960128	1.03586e+06	364761	198552	128104	249628	178603	178936	137352	112502
	TRUE		C17 H41 F3 N10 O	Full match	No results	No results	No match	No results	-2.86	458.34038	21.986	1590778.53	31	0	0				No matches found	No matches found	No matches found	No matches found	No MS2	[M+H]+1	193035	177134	178101	194291	173549	213057	198755	175655	203727	172008	173639	201262	177155	176443	175747	179135	188107	173273	176653	186619	187639	193213	163726	195682	191233
	TRUE		C19 H41 F N6 O	Full match	No results	No results	No match	No results	1.54	388.33319	21.616	16021736.22	37	0	0				No matches found	No matches found	No matches found	No matches found	No MS2	[M+H]+1	185245	136669	173463	132179	137464	137595	137979	130147	142153	135163	129041	133708	447880	158848	161855	583199	564584	163042	143107	72265.7	929144	130712	158908	144197	169529
	TRUE	HAD	C16 H35 N	Full match	No results	No results	Full match	No results	0.25	241.27701	22.947	1024556.32	26	0	0				No matches found	No matches found	No matches found	No matches found	No MS2	[M+H]+1	184090	245239	178737	152857	87058.7	52570.7	151432	158114	66059.1	195923	158787	160771	156330	350770	161448	144417	168719	115829	165369	151043	158574	157915	168178	164591	248825
	TRUE	1,1-Bis(8-carbamimidamidooctyl)guanidine	C19 H43 N9	Full match	No results	No results	Full match	No results	-0.27	397.36404	21.145	1187737.113	2	0	0				No matches found	No matches found	No matches found	No matches found	No MS2	[M+H]+1	125155	136713	126478	137593	137217	132707	131458	133514	125513	130299	189458	135119	147249	249654	124717	119135	133599	128360	120575	134786	131252	134586	124098	128514	138133
	TRUE		C16 H44 F N10 O5 P	Full match	No results	No results	Invalid mass	No results	1.12	506.32235	20.23	2399064.37	4	0	0				No matches found	No matches found	No matches found	No matches found	No MS2	[M+H]+1	171397	173160	199492	186113	222079	371185	218099	364547	167149	297684	191047	211512	426851	169682	227172	213900	290247	170371	495954	174762	225105	223293	449101	190021	455668
	TRUE		C16 H37 F2 N5 O3	Full match	No results	No results	Invalid mass	No results	1.47	385.28701	21.627	2964815.55	1	0	0				No matches found	No matches found	No matches found	No matches found	No MS2	[M+H]+1	564410	203909	177860	250815	130318	235782	148305	145996	161180	159716	213311	151059	206232	156041	172966	148345	154267	206227	180124	189879	165835	205575	256593	167253	255766
	TRUE	methyprylon	C10 H17 N O2	Full match	No results	No results	Full match	No results	-0.23	183.12589	19.314	1196851.374	372	0	0				No matches found	No matches found	No matches found	No matches found	No MS2	[M+H]+1	149246	104967	123489	226748	117872	167780	157635	119126	130047	119321	190969	108366	120603	106811	109820	186240	70570.4	83966.1	117847	100501	141828	105914	99372.4	113213	131840
	TRUE		C H3 O2 P S2	Full match	No results	No results	Invalid mass	No results	-2.79	141.93081	2.074	517024.8948	1	0	0				No matches found	No matches found	No matches found	No matches found	No MS2	[M+H]+1	212756	82941.6	91378	73819.1	92364.6	62842.1	299238	180023	111037	132235	194528	56520.8	332727	517025	102991	458963	73197.6	63389.5	54900.3	180721	93710.7	50053.8	94152.9	102340	59930
	TRUE		C17 H43 N7 O3	Full match	No results	No results	No match	No results	2.25	393.34362	23.025	1442777.33	1	0	0				No matches found	No matches found	No matches found	No matches found	No MS2	[M+H]+1	220554	184093	146480	149340	1.44278e+06	197296	203732	147022	129471	175821	158060	151834	232422	149619	152549	169033	1.36837e+06	159594	170458	149440	156159	155696	156214	151333	154851
	TRUE	tert-butyl 4-(3-ethoxy-3-oxopropyl)piperidine-1-carboxylate	C15 H27 N O4	Full match	No results	No results	Full match	No results	-0.73	285.1938	12.858	1432428.333	61	0	0				No matches found	No matches found	No matches found	No matches found	No MS2	[M+H]+1	244642	116700	83930.7	75502.9	200428	522494	113910	112739	129481	137380	110424	98091.8	159205	67743	97851.5	85934.9	111822	1.43243e+06	1.3671e+06	210439	107052	78150.2	159423	96557.9	119958
	TRUE		C12 H29 N9	Full match	No results	No results	No match	No results	-1.47	299.25415	20.32	821626.1835	1	0	0				No matches found	No matches found	No matches found	No matches found	No MS2	[M+H]+1	111835	281694	111783	127509	111221	125237	123833	119846	134838	821626	124342	133648	117095	129863	125845	113473	133046	125351	115738	111845	116075	229550	87460.2	167992	120011
	TRUE		C16 H44 N9 O P	Full match	No results	No results	No match	No results	-0.22	409.34055	22.582	4222733.481	1	0	0				No matches found	No matches found	No matches found	No matches found	No MS2	[M+H]+1	898978	179137	480492	172200	175513	140910	267103	163804	174061	164547	693338	175643	178364	151089	166898	165855	173935	186371	173340	163212	67645.5	1.24651e+06	534061	126194	175647
	TRUE	Jasmonal	C14 H18 O	Full match	No results	No results	Full match	No results	-0.48	202.13567	20.757	771586.3429	351	0	0				No matches found	No matches found	No matches found	No matches found	No MS2	[M+H]+1	222065	306540	128531	122883	134202	125792	162210	134011	131890	135013	105633	78927.5	133766	771586	219980	120481	117910	122058	123149	97074.1	227258	134909	90196.4	122604	140655
	TRUE	tert-butyl cyclohexylcarbamate	C11 H21 N O2	Full match	No results	No results	Full match	No results	-0.41	199.15715	19.22	2069538.352	238	0	0				No matches found	No matches found	No matches found	No matches found	No MS2	[M+H]+1	220373	675316	198570	381981	355241	373584	747318	809837	436694	180019	1.06548e+06	367387	225896	601413	209573	211275	194540	87464.2	221310	194965	284996	128522	224180	112175	1.22481e+06
	TRUE	2-(1H-imidazol-5-yl)ethanol	C5 H8 N2 O	Full match	No results	No results	Full match	No results	-0.39	112.06362	23.124	1070929.466	131	0	0				No matches found	No matches found	No matches found	No matches found	DDA for preferred ion	[M+H]+1	1.07093e+06	115052	118236	85831.1	117830	175218	114674	111822	113019	303646	112970	104264	134802	116053	114944	137088	194424	200159	123311	78192.1	112199	122293	270548	109093	210462
	TRUE	1-tetradecyl-5-oxopyrrolidine-3-carboxylic acid	C19 H35 N O3	Full match	No results	No results	Full match	No results	-0.89	325.2614	19.085	1909951.194	34	0	0				No matches found	No matches found	No matches found	No matches found	No MS2	[M+H]+1	113711	77379.4	1.60901e+06	159302	116890	208851	128713	111547	80408	114542	153346	252201	131805	1.5381e+06	1.70644e+06	715868	313702	140470	111286	139223	111292	1.90995e+06	207063	150728	114158
	TRUE	3,5-Dimethylpyrazole	C5 H8 N2	Full match	No results	No results	Full match	No results	-0.83	96.06867	24.236	1937272.01	52	0	0				No matches found	No matches found	No matches found	No matches found	No MS2	[M+H]+1	163230	181616	165665	129698	184367	223366	161981	165532	164550	184607	171141	1.93727e+06	173883	178261	171848	180095	168455	166188	196088	180651	175535	190184	214077	172054	157923
	TRUE	Valpromide	C8 H17 N O	Full match	No results	No results	Full match	No results	-0.46	143.13095	18.897	1614460.211	341	0	0				No matches found	No matches found	No matches found	No matches found	No MS2	[M+H]+1	109076	117090	138551	109337	104109	116134	128740	108748	135325	111986	150485	1.61446e+06	111576	106538	97954.8	112423	99468.7	118698	119442	156981	276860	105489	105872	130633	115737
	TRUE	2-Carbethoxycyclopentanone	C8 H12 O3	Full match	No results	No results	Full match	No results	2.45	156.07903	2.661	391585.0626	601	0	0				No matches found	No matches found	No matches found	No matches found	DDA for preferred ion	[M+H]+1	88878.3	111603	70628.9	208285	143237	391585	68230.3	246539	72322.5	62407.4	80776	70742.5	56289	139554	60236.9	138312	141380	75841.2	73643.3	67330.4	91361.1	147369	284766	158546	63891
	TRUE		C H2 F2 I P S Si2	Full match	No results	No results	No match	No results	-0.08	297.81659	1.383	880270.3542	1	0	0				No matches found	No matches found	No matches found	No matches found	No MS2	[M+H]+1	119458	180945	106139	131759	146749	105076	76440.5	119466	103455	136725	125297	88400.8	105033	124145	153138	90588.4	94493.7	135814	79994.2	87435.4	94725.5	156301	92668.2	114570	112614
	TRUE		C16 H37 F2 N5 O3	Full match	No results	No results	No match	No results	0.32	385.28657	22.686	1407998.14	1	0	0				No matches found	No matches found	No matches found	No matches found	No MS2	[M+H]+1	133553	119053	232158	90909.9	140305	105841	147974	119590	1.408e+06	163039	124423	175560	135944	124237	537898	148891	125817	133730	252373	128330	167933	142767	124109	959600	126890
	TRUE	ethyl[(5-propyl-1,2,4-oxadiazol-3-yl)methyl]amine	C8 H15 N3 O	Full match	No results	No results	Full match	No results	0.71	169.12163	22.284	1229849.915	94	0	0				No matches found	No matches found	No matches found	No matches found	No MS2	[M+H]+1	124774	170778	113244	123637	125140	113506	1.22985e+06	120966	789254	416170	193970	600153	98864.9	123545	1.14083e+06	153739	162451	108016	106939	140163	172706	112633	114395	113258	124566
	TRUE	Tributyl Orthoformate	C13 H28 O3	Full match	No results	No results	Full match	No results	-0.21	232.2038	17.312	1538127.329	22	0	0				No matches found	No matches found	No matches found	No matches found	No MS2	[M+H]+1	1.53813e+06	1.14951e+06	155898	801147	986198	700315	818246	123816	615690	1.02324e+06	431109	640796	124163	111744	1.30561e+06	181461	262317	484272	235307	135597	145997	190505	318315	390350	143831
	TRUE	3,5-DIMETHYLPYRAZOL-1-METHANOL	C6 H10 N2 O	Full match	No results	No results	Full match	No results	-0.75	126.07922	21.982	1858949.933	187	0	0				No matches found	No matches found	No matches found	No matches found	No MS2	[M+H]+1	238143	217998	219189	116574	228745	209673	247634	134701	250727	211690	166843	76719.3	218024	222577	219683	220461	231503	282227	217407	84775.7	224083	241904	1.48161e+06	240825	235351
	TRUE	methyprylon	C10 H17 N O2	Full match	No results	No results	Full match	No results	-0.03	183.12592	24.203	1833568.449	372	0	0				No matches found	No matches found	No matches found	No matches found	No MS2	[M+H]+1	438527	132922	142336	154447	448817	1.83357e+06	620197	130714	200816	160993	138042	122040	149547	131600	106558	1.13052e+06	176638	152017	132207	137306	123986	132551	172996	152767	119537
	TRUE		C17 H47 N10 O4 P	Full match	No results	No results	No match	No results	1.03	486.35244	21.218	1067114.376	3	0	0				No matches found	No matches found	No matches found	No matches found	No MS2	[M+H]+1	123330	914387	242747	90860	599469	115744	128803	119973	424415	122747	262749	107163	798759	163297	139760	117469	119543	124739	130030	124915	175021	131332	125507	118817	109968
	TRUE	Diethyl fumarate	C8 H12 O4	Full match	No results	No results	Full match	No results	0	172.07356	1.853	460004.9618	426	0	0				No matches found	No matches found	No matches found	No matches found	No MS2	[M+H]+1	80603.5	80820.8	90820.7	103838	460005	99230.6	78426.7	127479	98831.2	69619.5	84591.1	88005.7	63351.1	83733	68508	57999.4	84345.6	60948.9	63355.5	74132.9	90311.1	70552.7	157342	196138	154461
	TRUE	n-Butyl lactate	C7 H14 O3	Full match	No results	No results	Full match	No results	-0.82	146.09417	20.836	1210715.303	383	0	0				No matches found	No matches found	No matches found	No matches found	No MS2	[M+NH4]+1	124918	213341	65772.3	120816	742164	133655	166681	51984.1	1.17807e+06	71044.4	97574.5	114114	212239	140638	182251	115609	67585.3	219632	131556	98742.6	321976	90696.9	133984	1.21072e+06	136224
	TRUE		C8 H15 F Si	Full match	No results	No results	Invalid mass	No results	1.07	158.09287	12.796	1019420.268	16	0	0				No matches found	No matches found	No matches found	No matches found	No MS2	[M+H]+1	1.01942e+06	46101.2	54779.7	62223.4	53814	62269.1	64894.4	72883.1	45423.5	56252.2	43471.3	54467.2	78699	49200.9	49926.1	57807	63643	51816	51655.7	78812.2	84263.9	105673	62946.3	52142.3	52611.9
	TRUE	Boc-10-Adc-OH	C15 H29 N O4	Full match	No results	No results	Full match	No results	-1.34	287.20927	20.534	1766079.962	89	0	0				No matches found	No matches found	No matches found	No matches found	No MS2	[M+H]+1	185483	205737	197511	175440	169460	73676.8	183814	177237	359265	1.32413e+06	170544	162989	177622	158955	184908	281950	177121	213988	171374	173277	180177	174455	1.76608e+06	171027	180251
	TRUE		C17 H42 F N7 O4	Invalid mass	No results	No results	No match	No results	3.18	427.32959	20.142	1326931.316	10	0	0				No matches found	No matches found	No matches found	No matches found	No MS2	[M+H]+1	153298	139823	482077	143612	154324	150207	140913	189983	137678	192828	139197	131256	148320	471246	141411	134257	148848	70407.8	137366	140163	136804	251169	125621	257052	143104
	TRUE		C13 H38 F N10 O2 P	Invalid mass	No results	No results	Invalid mass	No results	3.14	416.29139	23.65	1729650.775	45	0	0				No matches found	No matches found	No matches found	No matches found	No MS2	[M+H]+1	148673	140353	134009	142250	135762	135198	246413	153252	129990	136769	142511	133111	131707	168117	134579	130162	136463	269904	194624	137366	142982	158498	128338	142885	1.72965e+06
	TRUE	Boc-8-Aoc-OH	C13 H25 N O4	Full match	No results	No results	Full match	No results	-0.17	259.17831	19.327	1448021.554	122	0	0				No matches found	No matches found	No matches found	No matches found	No MS2	[M+H]+1	161945	159044	1.44802e+06	165952	161436	173650	166700	107528	507014	94411.2	160557	159158	214511	524641	161294	317735	153374	158496	184428	199884	156519	155556	164691	147183	241552
	TRUE	Cyclopentane	C5 H10	Full match	No results	No results	Full match	Full match	0.08	70.07826	19.052	1720195.462	16	0	0				No matches found	No matches found	No matches found	Single match found	No MS2	[M+H]+1	145495	132052	132991	788404	125370	201946	529862	149374	148558	142949	166155	119202	137700	119606	208947	167722	126410	137129	125494	133865	167557	135557	132800	167517	142251
	TRUE		C5 H18 N7 O3 P	Full match	No results	No results	Invalid mass	No results	-2.75	255.12017	21.386	1225011.531	6	0	0				No matches found	No matches found	No matches found	No matches found	No MS2	[M+NH4]+1	104819	124449	124026	81845.5	214792	121936	88111.5	136446	386781	149850	74159.7	118599	59281.2	116720	63342.1	212099	118219	128678	110164	114973	1.22501e+06	929583	110055	237136	121960
	TRUE	Diethyl fumarate	C8 H12 O4	Full match	No results	No results	Full match	No results	-0.48	172.07348	2.548	850480.8971	426	0	0				No matches found	No matches found	No matches found	No matches found	DDA for preferred ion	[M+H]+1	156047	164683	42463	112112	86049.6	80400.3	50406	850481	155670	132156	66678.1	176802	132358	138412	83785.2	103383	115683	127343	70273.9	217461	122381	64917	65679.4	60229.9	61328.3
	TRUE	dimethyl itaconate	C7 H10 O4	Full match	No results	No results	Full match	No results	0.1	158.05792	20.9	1876168.004	302	0	0				No matches found	No matches found	No matches found	No matches found	No MS2	[M+H]+1	145934	1.11158e+06	142651	103853	141301	148758	151445	149509	147454	148043	136637	142536	139288	143366	164966	132974	239262	154357	138530	82591.8	236002	203455	139700	895770	134047
	TRUE	2-[2-(Tetradecyloxy)ethoxy]ethanol	C18 H38 O3	Full match	No results	No results	Full match	No results	0.64	302.28229	19.378	1729998.253	8	0	0				No matches found	No matches found	No matches found	No matches found	No MS2	[M+H]+1	185450	170061	177734	255870	295446	1.73e+06	184181	189393	181555	203886	175525	178007	167459	169471	178719	176886	183930	195470	205169	196819	174405	181675	185880	175405	178694
	TRUE	n-Butyl lactate	C7 H14 O3	Full match	No results	No results	Full match	No results	-0.73	146.09419	23.724	1629506.81	383	0	0				No matches found	No matches found	No matches found	No matches found	No MS2	[M+NH4]+1	169995	146988	94044.8	145264	50427.4	147446	1.62951e+06	140660	220951	135890	170401	147765	140743	137086	90977.1	652247	157799	288971	147077	82665.2	145955	144707	144977	139139	170121
	TRUE	N-Myristoyl-DL-homoserine lactone	C18 H33 N O3	Full match	No results	No results	Full match	No results	-1.04	311.24572	18.178	1560200.058	32	0	0				No matches found	No matches found	No matches found	No matches found	No MS2	[M+H]+1	304973	109675	361649	218539	159054	100099	136318	294098	120398	96310.7	126868	257917	78928.2	1.5602e+06	278137	252251	141605	1.31418e+06	104532	140653	116025	230891	216087	222419	465929
	TRUE	2-Acetamidobutanoic acid	C6 H11 N O3	Full match	No results	No results	Full match	No results	-0.66	145.0738	8.38	954378.89	324	0	0				No matches found	No matches found	No matches found	No matches found	DDA for other ion	[M+H]+1	107714	72735.4	77084.4	145753	177341	78483.2	88457.2	31574.9	96073.7	43535.7	71296.4	82088.4	78560.4	100725	71900.6	326446	92669.1	84561.4	68754.9	78394.4	78594.3	57579.6	71473	70608	128592
	TRUE	Dmapn	C5 H10 N2	Full match	No results	No results	Full match	No results	-0.67	98.08433	19.509	1320171.843	78	0	0				No matches found	No matches found	No matches found	No matches found	No MS2	[M+H]+1	126806	137974	63301.6	152378	128389	178153	137596	140292	125563	149779	135557	133482	1.32017e+06	259443	128036	152911	154747	122929	142898	194392	140440	136400	139161	128262	144113
	TRUE		C2 H8 P2 S2	Invalid mass	No results	No results	Invalid mass	No results	4.05	157.9549	11.461	1279960.742	2	0	0				No matches found	No matches found	No matches found	No matches found	No MS2	[M+H]+1	183784	107813	511782	75948.3	145973	111240	62371.8	181492	65591.8	172870	64361.5	99617.6	89752.9	47814.7	72839	103755	127732	123758	123709	87286.3	62428.6	187260	30414.9	137915	97417.8
	TRUE	Civetone	C17 H30 O	Full match	No results	No results	Full match	No results	0.39	250.22976	21.829	1160763.524	86	0	0				No matches found	No matches found	No matches found	No matches found	No MS2	[M+H]+1	162941	157531	180409	171176	169702	626061	148501	158604	161368	95951	161148	148069	336856	142294	156538	647580	956363	158118	212422	179812	171425	1.16076e+06	173602	153001	162260
	TRUE		C15 H36 F N5 Si	Full match	No results	No results	Invalid mass	No results	2.37	333.27319	19.593	1678313.136	3	0	0				No matches found	No matches found	No matches found	No matches found	No MS2	[M+H]+1	240861	294310	191184	189595	181788	181397	184035	200595	237004	184494	187103	166612	179685	228640	214839	191936	196235	182294	215650	215632	186990	248733	202374	185901	189823
	TRUE	Ethyl levulinate	C7 H12 O3	Full match	No results	No results	Full match	No results	0.11	144.07866	24.243	2519976.295	517	0	0				No matches found	No matches found	No matches found	No matches found	No MS2	[M+H]+1	147975	164517	149880	221088	167010	202336	146419	146181	157765	146350	118604	152817	85092.5	161478	155669	170541	813274	150541	177627	90702.6	162256	148478	138756	155855	143055
	TRUE		C H4 F4 I O5 P3 Si2	Full match	No results	No results	Invalid mass	No results	-1.85	447.77826	0.791	1689629.351	1	0	0				No matches found	No matches found	No matches found	No matches found	No MS2	[M+H]+1	207138	91083	83329.2	378400	150768	96123	100945	138556	108094	150628	1.68963e+06	119275	195514	109308	184183	88852.6	167470	175366	111308	349830	110185	186761	133948	85448.6	209724
	TRUE	3,5-ditert-butyl-4-hydroxybenzonitrile	C15 H21 N O	Full match	No results	No results	Full match	No results	-0.68	231.16216	8.954	587760.034	323	0	0				No matches found	No matches found	No matches found	No matches found	No MS2	[M+H]+1	68709.8	67950.6	62129.1	72272.5	75635.9	317979	62372.7	64812.8	59158.3	276424	62094.7	48975.1	72112.9	61163.8	68461.9	59830	68253.8	62021.2	82585.8	38188.8	66038.1	61187.3	71280.8	70502.7	419961
	TRUE	Diethyl fumarate	C8 H12 O4	Full match	No results	No results	Full match	No results	-0.74	172.07343	0.555	1726141.926	426	0	0				No matches found	No matches found	No matches found	No matches found	No MS2	[M+H]+1	184743	171751	95175.1	919238	112498	150407	93104.1	109518	164723	109900	146949	131943	188700	208452	124461	118635	520070	182798	124455	101967	183459	114852	85942.2	93420.1	77663.2
	TRUE		C18 H42 N10 O	Full match	No results	No results	No match	No results	-1.28	414.35378	18.564	1056841.646	4	0	0				No matches found	No matches found	No matches found	No matches found	No MS2	[M+H]+1	133318	63449.4	104865	79098.1	73784	71600.5	78074.6	74576.8	73567.7	69105.8	112249	169696	103527	76454.1	91452.3	69764.6	561887	89000.6	72861.6	806485	1.05684e+06	123785	129500	66743.3	166354
	TRUE		C10 H28 F2 N8	Full match	No results	No results	Unused	No results	-2.2	298.23984	20.039	942453.1691	24	0	0				No matches found	No matches found	No matches found	No matches found	No MS2	[M+H]+1	113722	119380	116785	155416	89685.5	128466	122438	128372	105066	120467	508994	121932	143142	164871	135382	121544	132255	110030	542434	674275	640738	121846	271045	246678	126187
	TRUE	tert-butyl cyclohexylcarbamate	C11 H21 N O2	Full match	No results	No results	Full match	No results	-0.66	199.1571	19.249	2069538.352	238	0	0				No matches found	No matches found	No matches found	No matches found	No MS2	[M+H]+1	76264.7	675316	112132	292526	78021.8	169159	203041	809837	987396	125034	1.06548e+06	124375	259622	601413	235157	125825	153086	357187	130599	211322	145424	131702	246927	100318	1.22481e+06
	TRUE	dimethyl itaconate	C7 H10 O4	Full match	No results	No results	Full match	No results	-0.25	158.05787	20.765	1876168.004	302	0	0				No matches found	No matches found	No matches found	No matches found	No MS2	[M+H]+1	159741	123957	150443	126298	137069	179025	135904	141089	140348	137897	135918	130933	136623	135068	127895	121172	131105	129946	171421	69410.9	202224	134234	132566	125223	212449
	TRUE		C2 H7 P Si2	Full match	No results	No results	Invalid mass	No results	2.39	117.98267	17.213	1846040.518	8	0	0				No matches found	No matches found	No matches found	No matches found	DDA for preferred ion	[M+H]+1	213230	130172	283097	313549	352440	334766	281435	334387	302089	114647	607694	335507	594505	173779	293894	302432	241087	527040	326641	320148	305727	661679	291425	1.84604e+06	756942
	TRUE		C16 H42 F2 N10	Full match	No results	No results	No match	No results	-3	412.35496	21.769	2179034.797	112	0	0				No matches found	No matches found	No matches found	No matches found	No MS2	[M+H]+1	190116	190422	193629	173512	214557	184734	196015	201529	188571	228784	180246	184435	195692	191158	191203	2.17903e+06	196841	206832	198307	198033	184387	197294	190438	252441	192878
	TRUE		C H2 F2 I P S Si2	Full match	No results	No results	No match	No results	0.01	297.81661	0.558	1156726.152	1	0	0				No matches found	No matches found	No matches found	No matches found	No MS2	[M+H]+1	126499	68480.4	121396	164504	73029.1	75203.8	60576.8	135288	51634.1	92935	128444	80201.7	115580	1.15673e+06	800730	89656.8	168370	123128	110198	124414	95742.2	83664.2	117646	147543	85495.4
	TRUE		C18 H41 F5 N10	Full match	No results	No results	Unused	No results	-0.45	492.34336	21.589	2189858.631	4	0	0				No matches found	No matches found	No matches found	No matches found	No MS2	[M+H]+1	164347	860177	169937	156750	156784	162494	185591	163483	112225	159204	161537	174081	196761	2.18986e+06	169516	153325	160633	160093	161776	166711	163305	159194	157265	164603	392607
	TRUE	N-[(1,1-Dimethylethoxy)carbonyl]-N-(methoxymethyl)-L-isoleucine ethyl ester	C15 H29 N O5	Full match	No results	No results	Full match	No results	0.11	303.20461	23.715	2980390.35	14	0	0				No matches found	No matches found	No matches found	No matches found	No MS2	[M+H]+1	141873	154437	145978	144654	145393	139191	147612	138724	152055	147302	127037	146931	176010	342327	148262	122488	89486.6	154087	159671	141718	145342	145937	144368	2.98039e+06	153511
	TRUE	Butyric anhydride	C8 H14 O3	Full match	No results	No results	Full match	No results	-1.6	158.09404	14.548	1297953.07	666	0	0				No matches found	No matches found	No matches found	No matches found	No MS2	[M+H]+1	113924	96734.5	122281	56386.3	91291.9	48298.4	114684	205594	115403	227614	92284.8	190754	110439	1.29795e+06	125938	133112	88956.1	113661	113504	92654.4	123905	113854	203808	118039	127272
	TRUE		C H2 F2 I P S Si2	Full match	No results	No results	No match	No results	0.24	297.81668	1.305	613894.4624	1	0	0				No matches found	No matches found	No matches found	No matches found	No MS2	[M+H]+1	140110	347627	613894	389662	85951.5	224021	77156.8	106606	86053	428783	119564	132763	262571	163731	300648	89588.2	101801	105981	80985.2	82119.9	527740	148361	81764.3	111123	474186
	TRUE	1-tetradecyl-5-oxopyrrolidine-3-carboxylic acid	C19 H35 N O3	Full match	No results	No results	Full match	No results	0.03	325.2617	18.964	1909951.194	34	0	0				No matches found	No matches found	No matches found	No matches found	No MS2	[M+H]+1	185958	1.26136e+06	1.60901e+06	184647	122374	128363	262427	127920	104061	1.75833e+06	120892	130058	142471	1.5381e+06	1.70644e+06	715868	299379	157327	162451	849336	161262	1.90995e+06	201538	214535	423911
	TRUE	DIETHYLAMINOETHYL METHACRYLATE	C10 H19 N O2	Full match	No results	No results	Full match	No results	0.23	185.14162	24.254	1950261.117	373	0	0				No matches found	No matches found	No matches found	No matches found	No MS2	[M+H]+1	193112	207108	202533	280797	213289	256980	77962.8	198294	200372	196032	196896	303523	116335	205088	199565	216598	207565	194929	225598	207838	225195	211021	127280	206085	1.48364e+06
	TRUE	aminoazobenzene	C6 H7 N3	Full match	No results	No results	Full match	No results	-0.87	121.06389	23.964	955775.7046	69	0	0				No matches found	No matches found	No matches found	No matches found	No MS2	[M+H]+1	151854	149418	163582	97174.9	152366	144395	172904	100429	726148	85822.9	150446	151753	341141	158298	147389	154875	167607	210687	154871	826050	155985	149539	195007	155950	955776
	TRUE	N-lauroylglycine	C14 H27 N O3	Full match	No results	No results	Full match	No results	-0.33	257.19901	20.877	2233235.423	92	0	0				No matches found	No matches found	No matches found	No matches found	No MS2	[M+H]+1	222868	172835	311911	195775	211471	221960	226189	302530	238740	2.23324e+06	633489	264557	223867	232823	228019	208922	224859	169414	221836	232394	223043	1.2701e+06	241223	813374	217169
	TRUE	Dodecylethanol amide	C14 H29 N O2	Full match	No results	No results	Full match	No results	0	243.21983	17.37	949970.0473	62	0	0				No matches found	No matches found	No matches found	No matches found	No MS2	[M+H]+1	124657	142736	891103	163468	136975	132333	471761	133011	262416	794726	183162	294100	594730	116946	588475	128827	887524	174728	152287	175087	129682	145010	129875	281775	123343
	TRUE		C18 H40 F N7 O3	Full match	No results	No results	No match	No results	0.92	421.31806	23.248	1927793.379	11	0	0				No matches found	No matches found	No matches found	No matches found	No MS2	[M+H]+1	198350	209861	199990	205699	198945	204586	196977	333636	200898	197146	201335	199156	198686	200216	1.30743e+06	181470	206356	203185	202859	200674	1.32157e+06	203959	221353	212520	203096
	TRUE		C H3 F4 N Si2	Full match	No results	No results	Invalid mass	No results	-1.14	160.97383	15.246	1251107.606	3	0	0				No matches found	No matches found	No matches found	No matches found	No MS2	[M+H]+1	94558.4	97149.4	95625.9	123562	112067	101411	117100	95373.2	75536.1	92696.7	66588.4	122132	110555	73497.1	111059	125062	99632	41076.9	121145	104777	99872.8	103618	101542	102808	95428.5
	TRUE		C18 H43 F N6 O4	Full match	No results	No results	No match	No results	2.28	426.33396	19.809	1727612.103	11	0	0				No matches found	No matches found	No matches found	No matches found	No MS2	[M+H]+1	202719	172082	1.72761e+06	96388.5	146045	129561	139589	125306	251944	149825	142673	191387	139886	134083	144724	123074	472399	136781	129400	127833	308118	164690	130132	294822	145788
	TRUE	DPA	C12 H23 N O2	Full match	No results	No results	Full match	No results	0.53	213.17299	21.826	985444.4896	146	0	0				No matches found	No matches found	No matches found	No matches found	No MS2	[M+H]+1	323791	135066	130354	102690	121427	125524	127324	143380	138356	133736	138168	126953	139714	110327	711522	632879	517829	985444	139070	70912.4	146979	146098	138012	101046	86743
	TRUE		C H2 F2 O P2 Si2	Full match	No results	No results	No match	No results	-1.49	185.90847	1.987	647254.2762	6	0	0				No matches found	No matches found	No matches found	No matches found	DDA for other ion	[M+H]+1	96082.2	143273	170029	224998	93780.5	270111	99712	95197	91689.7	136655	647254	89415.6	422468	230394	56674.4	188499	124437	91522.9	92549.2	95033.3	435557	86746.1	121130	97101.5	94897.2
	TRUE	4,5-dimethyl-2-heptene	C9 H18	Full match	No results	No results	Full match	No results	-1.39	126.14068	21.339	5477071.808	175	0	0				No matches found	No matches found	No matches found	No matches found	No MS2	[M+H]+1	167177	131629	5.47707e+06	127430	122757	177872	165892	142177	123014	125188	115481	239396	137870	119538	172117	114315	137116	121299	124598	123475	122105	137685	118993	157551	135507
	TRUE		C16 H39 F5 N10	Full match	No results	No results	Invalid mass	No results	1.25	466.32852	19.588	4183501.604	15	0	0				No matches found	No matches found	No matches found	No matches found	No MS2	[M+H]+1	179881	167045	182514	174470	175414	175037	175972	173928	183368	178025	180543	160771	306564	185541	132469	434915	255352	171869	218672	171264	179493	196173	283175	179383	172596
	TRUE	(−)-Lupinine	C10 H19 N O	Full match	No results	No results	Full match	No results	-0.07	169.14665	1.85	3668252.613	314	0	0				No matches found	No matches found	No matches found	No matches found	No MS2	[M+H]+1	61097.5	107167	157417	102623	94054.1	91053.3	128986	91567.2	104372	57624	121238	152538	57603.4	145132	118743	100529	132193	128130	80813.9	128492	156533	122287	118357	88959.9	74849.5
	TRUE		C14 H34 F3 N9	Invalid mass	No results	No results	Invalid mass	No results	-3.19	385.2877	22.799	1632901.541	1	0	0				No matches found	No matches found	No matches found	No matches found	No MS2	[M+H]+1	154675	162520	160025	158908	151602	282954	178110	285801	195082	152635	341582	222808	309477	161462	176889	177053	159631	94140.8	197206	809608	154641	161907	154802	165450	135463
	TRUE	Stearoylethanolamide	C20 H41 N O2	Full match	No results	No results	Full match	No results	0.14	327.31378	21.363	2450316.869	37	0	0				No matches found	No matches found	No matches found	No matches found	No MS2	[M+H]+1	237044	238764	236170	221977	230861	405446	234570	230599	230098	214865	232785	236784	242118	233194	179730	215964	239141	237411	277972	231849	229635	230333	224041	216434	232767
	TRUE		C16 H39 F N9 O5 P	Full match	No results	No results	Invalid mass	No results	-2.25	487.27848	21.781	1871696.654	6	0	0				No matches found	No matches found	No matches found	No matches found	No MS2	[M+H]+1	841503	271353	139099	124647	1.8717e+06	112749	499875	170786	134061	153830	289785	992131	140581	242946	137356	117688	137084	148583	136589	142262	579005	280148	149128	136019	236552
	TRUE	1-Hexadecanoylpyrrolidine	C20 H39 N O	Full match	No results	No results	Full match	No results	0.65	309.30337	19.244	1396296.224	46	0	0				No matches found	No matches found	No matches found	No matches found	No MS2	[M+H]+1	126036	124321	118277	84477.9	118149	118810	152110	115216	120530	113253	119335	115069	111043	121988	125894	111234	112256	288739	122779	123839	112047	311367	89570.3	71706.4	123184
	TRUE	Ethyl levulinate	C7 H12 O3	Full match	No results	No results	Full match	No results	-0.46	144.07858	24.207	2519976.295	517	0	0				No matches found	No matches found	No matches found	No matches found	No MS2	[M+H]+1	131329	176790	174083	240316	203446	210718	162639	173854	166823	163179	165501	162317	172398	175032	180644	176165	813274	168625	175840	136998	168667	1.24442e+06	190879	177862	108792
	TRUE	1,2-Dioxin	C4 H4 O2	Full match	No results	No results	Full match	No results	-0.12	84.02112	19.585	3533262.671	29	0	0				No matches found	No matches found	No matches found	No matches found	No MS2	[M+H]+1	179861	201610	184238	174451	175395	180900	175952	199249	293102	182847	180523	58517.9	92829.1	604543	166462	181714	189334	179256	159279	171245	179473	345989	184912	258035	1.37679e+06
	TRUE	N-Heptadecyl-1,3-propanediamine	C20 H44 N2	Full match	No results	No results	Full match	No results	-0.75	312.35022	21.279	1149057.388	4	0	0				No matches found	No matches found	No matches found	No matches found	No MS2	[M+H]+1	198803	187025	165053	163184	160492	157310	168688	162266	159354	163685	170685	959796	164029	1.14906e+06	178123	161300	155838	124829	152748	195989	167241	224026	86152.5	672231	180088
	TRUE	ethyl[(5-propyl-1,2,4-oxadiazol-3-yl)methyl]amine	C8 H15 N3 O	Full match	No results	No results	Full match	No results	0.05	169.12152	23.145	1624472.112	94	0	0				No matches found	No matches found	No matches found	No matches found	No MS2	[M+H]+1	142094	144868	139827	125030	919977	141149	198398	142176	461751	151942	148047	246479	581527	1.62447e+06	146172	140527	211043	139876	151668	132751	145310	147833	146858	152411	852273
	TRUE		C18 H41 F4 N9 O	Invalid mass	No results	No results	Invalid mass	No results	3.82	475.33883	21.607	4766812.539	1	0	0				No matches found	No matches found	No matches found	No matches found	No MS2	[M+H]+1	168378	161569	158949	208141	145938	168409	146484	151196	150916	223303	2.53121e+06	141950	157886	4.76681e+06	160051	146610	194905	148677	213123	185244	151756	145462	150244	196769	209145
	TRUE	3,3′-(dodecylimino)bispropane-1,2-diol	C18 H39 N O4	Full match	No results	No results	Full match	No results	-0.44	333.28776	17.538	1826002.539	2	0	0				No matches found	No matches found	No matches found	No matches found	No MS2	[M+H]+1	145335	148788	152101	179532	1.18934e+06	143898	148644	187906	125638	145519	191435	1.826e+06	142919	150465	150204	356976	147253	139465	147020	145517	152319	329600	408161	138605	161243
	TRUE		C16 H36 F N5 O S	Full match	No results	No results	Invalid mass	No results	0.76	365.26274	21.285	3007518.75	1	0	0				No matches found	No matches found	No matches found	No matches found	No MS2	[M+H]+1	147251	207161	164023	162165	160885	156328	161736	95528.2	158359	196804	120027	162804	214007	160565	158329	223663	154865	165549	151794	323557	3.00752e+06	145374	156319	167521	159963
	TRUE	N-Carbethoxypiperazine	C7 H14 N2 O2	Full match	No results	No results	Full match	No results	0.27	158.10557	20.462	2366674.068	274	0	0				No matches found	No matches found	No matches found	No matches found	No MS2	[M+H]+1	214791	224757	747943	322851	204751	176847	192947	187350	123304	204270	234028	85860.5	202780	189428	146027	180934	198150	228329	183516	191241	181892	602968	210180	194490	195325
	TRUE	Pentadecanedioic acid	C15 H28 O4	Full match	No results	No results	Full match	No results	0.01	272.19876	21.921	2437479.965	173	0	0				No matches found	No matches found	No matches found	No matches found	No MS2	[M+H]+1	147817	206952	208182	244930	192129	188609	1.24687e+06	2.43748e+06	1.15952e+06	207540	776397	223854	190810	203585	213728	182703	191528	212117	145594	209930	396577	200074	191828	107035	219484
	TRUE	1,1′-(Octylimino)dipropan-2-ol	C14 H31 N O2	Full match	No results	No results	Full match	No results	-0.01	245.23548	21.757	4463979.463	9	0	0				No matches found	No matches found	No matches found	No matches found	No MS2	[M+H]+1	157614	172584	571987	102551	170342	173771	163298	178664	117975	60402.2	180972	222714	172458	169470	200811	166094	174508	170998	182610	179581	388959	174910	168866	58263.7	121641
	TRUE	Butyldiglycol acetate	C10 H20 O4	Full match	No results	No results	Full match	No results	-0.27	204.1361	21.218	1415216.792	77	0	0				No matches found	No matches found	No matches found	No matches found	No MS2	[M+H]+1	166944	138939	68563.5	124789	153047	128846	135550	133554	136035	136642	154038	119294	207631	146060	140974	130767	133075	202670	144749	139056	142626	146198	79613.4	132267	108209
	TRUE		C18 H44 F2 N10 O	Full match	No results	No results	No match	No results	-2.24	454.36574	20.272	1483238.55	7	0	0				No matches found	No matches found	No matches found	No matches found	No MS2	[M+H]+1	84766.9	144569	135219	192812	90742.9	185286	144568	125568	124633	151128	140843	141451	150569	143917	147250	164567	141259	134961	138926	105262	146698	143619	125131	97677.6	201703
	TRUE	Heptenal	C7 H12 O	Full match	No results	No results	Full match	No results	-0.83	112.08872	24.15	2299506.664	403	0	0				No matches found	No matches found	No matches found	No matches found	No MS2	[M+H]+1	174841	176056	137799	197611	177016	176872	148807	218614	168487	161726	216339	167335	177298	2.08585e+06	178374	167652	106650	172308	227196	170702	171120	161171	162985	172189	156704
	TRUE	Rasagiline	C12 H13 N	Full match	No results	No results	Full match	No results	0.21	171.10484	22.057	999309.5178	168	0	0				No matches found	No matches found	No matches found	No matches found	No MS2	[M+H]+1	129650	126805	179564	91819.1	133244	89500.4	132759	203072	135020	309328	128028	88048.8	137603	544350	134565	117725	999310	79862.8	128585	130341	128784	91554	128190	132953	139958
	TRUE	2-Carbethoxycyclopentanone	C8 H12 O3	Invalid mass	No results	No results	Invalid mass	No results	3.54	156.0792	5.036	677949.5777	601	0	0				No matches found	No matches found	No matches found	No matches found	DDA for preferred ion	[M+H]+1	48115.3	68714.7	116885	677950	131932	35836.8	34344.6	48102.8	133376	63725.5	58287.5	35622.9	460401	114264	117855	80215.7	38486.3	35574	76175.6	80242	67434.7	61967.5	86363.6	58278.9	31718.9
	TRUE		C H2 F3 N O Si	Full match	No results	No results	Invalid mass	No results	-2.08	128.98551	25.17	1123917.434	2	0	0				No matches found	No matches found	No matches found	No matches found	DDA for preferred ion	[M+H]+1	162436	872157	161646	160534	541274	118739	145970	154897	410912	1.12392e+06	683876	160402	166030	205684	164532	1.0504e+06	147036	164521	154878	160742	162355	133688	159413	215284	372779
	TRUE	Stearoylethanolamide	C20 H41 N O2	Full match	No results	No results	Full match	No results	-0.67	327.31351	20.768	1853303.427	37	0	0				No matches found	No matches found	No matches found	No matches found	No MS2	[M+H]+1	257070	201409	218587	205213	190021	72916.5	1.07394e+06	222397	218876	284367	238738	212743	221989	222346	224245	218215	187392	211141	208578	193045	204737	99746.6	215398	203466	233423
	TRUE	Diethyl malonate	C7 H12 O4	Full match	No results	No results	Full match	Full match	-0.5	160.07348	20.804	1534388.503	321	0	0				No matches found	No matches found	No matches found	Single match found	No MS2	[M+H]+1	271653	255514	267107	255262	262284	258646	272464	870377	249827	282476	261342	270172	279380	265118	272710	268439	269624	271345	257609	266972	269276	399762	1.53439e+06	291431	84203.9
	TRUE		C4 H9 N9	Full match	No results	No results	No match	No results	-2.39	183.09765	24.307	3170573.134	1	0	0				No matches found	No matches found	No matches found	No matches found	No MS2	[M+H]+1	177003	182985	239855	232831	2.80499e+06	200730	184960	181402	172708	225996	164861	172888	182557	186889	187714	192582	143494	174376	202017	192581	198874	181899	196090	184191	300775
	TRUE	Valproic acid	C8 H16 O2	Full match	No results	No results	Full match	Full match	0.18	144.11506	7.502	2527874.067	472	0	0				No matches found	No matches found	No matches found	Single match found	No MS2	[M+H]+1	59868.5	57589	282188	54342.7	62066.5	110889	60277.2	376143	60359.2	68725.2	302548	149613	59714.9	57890.4	146259	59918	61221.2	74809.6	56437	411729	58156.3	117865	26617.1	60494.5	59954.8
	TRUE	N-Boc-guanidine	C6 H13 N3 O2	Full match	No results	No results	Full match	No results	-0.24	159.10074	9.781	715184.7739	45	0	0				No matches found	No matches found	No matches found	No matches found	No MS2	[M+H]+1	53740.3	155483	119495	124844	65867.3	48473.4	715185	56645.3	61924.9	50914.3	48726.4	56308.1	58280.4	54481	60505	57633.3	107658	47135.8	50790.6	50531.3	53084.8	24735.5	48232.8	50204.6	52478.9
	TRUE		C18 H41 F5 N10	Full match	No results	No results	No match	No results	0.42	492.34379	23	1366252.905	4	0	0				No matches found	No matches found	No matches found	No matches found	No MS2	[M+H]+1	201122	197007	194169	184100	213480	198608	195104	188782	191761	197268	202238	306698	196036	250291	189438	218318	202448	1.36625e+06	425382	188535	208786	196794	222491	157575	194481
	TRUE		C17 H38 F2 N10 O2	Invalid mass	No results	No results	Invalid mass	No results	-4.34	452.31276	22.182	1193673.206	9	0	0				No matches found	No matches found	No matches found	No matches found	No MS2	[M+H]+1	670809	143406	204185	564845	150684	153004	148862	152717	154678	153082	142019	165170	148734	137937	156028	154404	146122	153851	141306	136108	182727	73282.3	153407	150430	270801
	TRUE		C28 H57 Br N4	Full match	No results	No results	Invalid mass	No results	2.65	528.37806	20.342	1686197.61	5	0	0				No matches found	No matches found	No matches found	No matches found	No MS2	[M+H]+1	181598	381891	171053	140970	143650	131233	143383	146036	152401	117179	149473	136873	238698	157440	112456	404653	197959	124281	149138	1.6862e+06	158185	145401	143493	160069	150194
	TRUE	Quinuclidinol	C7 H13 N O	Full match	No results	No results	Full match	Full match	-0.65	127.09963	20.145	3090147.243	325	0	0				No matches found	No matches found	No matches found	Single match found	No MS2	[M+H]+1	286714	119053	1.14404e+06	825023	263908	128337	119981	112213	124347	122677	136806	111129	126288	111337	114057	114314	126738	396188	116961	119343	139622	778821	136683	281655	3.09015e+06
	TRUE	3-Ethyl-1-heptyne	C9 H16	Full match	No results	No results	Full match	No results	-0.93	124.12509	22.951	1413452.716	202	0	0				No matches found	No matches found	No matches found	No matches found	No MS2	[M+H]+1	133578	141735	137066	711605	136626	137805	135390	141365	134547	135164	141967	143740	139769	143014	144346	129119	150846	756515	137333	1.41345e+06	141776	141187	150363	147156	135227
	TRUE		C15 H36 F N5 Si	Full match	No results	No results	Invalid mass	No results	0.96	333.27272	19.852	3387180.15	3	0	0				No matches found	No matches found	No matches found	No matches found	No MS2	[M+H]+1	184508	3.03385e+06	3.38718e+06	190208	873032	1.13052e+06	2.54555e+06	203773	178864	203971	177095	183802	191419	178676	175503	679028	177105	188315	179457	195749	199706	200445	218548	219751	233272
	TRUE		C3 H13 F N5 P	Full match	No results	No results	No match	No match	-0.18	169.08923	20.223	2799645.843	68	0	0				No matches found	No matches found	No matches found	Single match found	No MS2	[M+H]+1	205173	204362	194463	255641	193597	401510	212531	206054	200087	215298	86925.6	209487	225301	203119	231562	366114	213466	203944	938365	202279	195107	87366.6	204688	92914.6	214446
	TRUE		C15 H42 F N10 O5 P	Full match	No results	No results	Invalid mass	No results	0.71	492.30648	19.608	2846510.269	4	0	0				No matches found	No matches found	No matches found	No matches found	No MS2	[M+H]+1	311666	180787	191036	135126	103674	184052	407686	195770	100162	374850	181035	182090	176704	189092	393687	185213	1.50496e+06	181713	183331	161336	189234	199928	203278	108115	628912
	TRUE	N-ethylmaleimide	C6 H7 N O2	Full match	No results	No results	Full match	No results	-0.02	125.04768	1.822	635584.797	214	0	0				No matches found	No matches found	No matches found	No matches found	DDA for other ion	[M+H]+1	391628	593403	35904.2	106569	82344.1	58839.1	57668	67818.3	635585	60317.4	93542.3	58735.3	64041.5	76743.5	97713.1	62890.9	76342.3	90153.5	60205.6	78186.6	76009.4	76940.8	58647.9	81107.9	59863.8
	TRUE	Diethyl fumarate	C8 H12 O4	Full match	No results	No results	Full match	No results	-0.46	172.07348	0.669	964572.2813	426	0	0				No matches found	No matches found	No matches found	No matches found	No MS2	[M+H]+1	78850.9	228212	55849.8	132121	106157	87613.9	167758	93526.4	91638.5	73725.6	69475.4	89950.1	188700	74471.7	58547.6	337236	67224.7	103895	61268.1	82222.5	80587.4	68334.1	126779	164062	166043
	TRUE	Acetophenone	C8 H8 O	Full match	No results	No results	Full match	Full match	-1.21	120.05737	21.54	1489793.345	58	0	0				No matches found	No matches found	No matches found	Single match found	No MS2	[M+H]+1	185407	178351	287738	197474	194903	173841	177084	179940	193310	145892	59341.4	178249	195560	185577	126618	195498	179835	150879	1.48979e+06	368137	190378	188978	184030	196734	185721
	TRUE		C17 H49 N10 P3	Invalid mass	No results	No results	No match	No results	-3.44	486.33378	21.124	925294.2629	30	0	0				No matches found	No matches found	No matches found	No matches found	No MS2	[M+H]+1	135500	146732	136165	128493	145996	143472	141259	129163	125789	142363	139787	146342	156669	146528	136765	120158	131397	132638	121737	134213	142226	139668	141256	144994	143036
	TRUE	Diethyl malonate	C7 H12 O4	Full match	No results	No results	Full match	Full match	0.06	160.07357	20.452	1428022.17	321	0	0				No matches found	No matches found	No matches found	Single match found	No MS2	[M+H]+1	157414	144286	137471	142725	290004	87319.5	221082	171314	165731	149654	1.06652e+06	154921	136969	1.21217e+06	132008	136616	149615	156763	219028	153176	139286	128199	246405	146851	147482
	TRUE	N-lauroylglycine	C14 H27 N O3	Full match	No results	No results	Full match	No results	-0.66	257.19892	20.242	1451874.492	92	0	0				No matches found	No matches found	No matches found	No matches found	No MS2	[M+H]+1	112014	192497	199565	265504	113317	139946	861007	205655	91329.9	770265	98883.1	206642	97794.6	204479	201976	252574	315851	201175	208576	1.45187e+06	188249	221127	200651	200533	208674
	TRUE		C16 H44 F N10 O2 P	Full match	No results	No results	No match	No results	2.63	458.33824	20.807	7783686.685	30	0	0				No matches found	No matches found	No matches found	No matches found	No MS2	[M+H]+1	2.03008e+06	114718	236585	228338	288619	215330	169610	2.02198e+06	1.88322e+06	193880	272134	158738	209246	153504	146968	141662	193541	151408	174369	150326	155912	2.51445e+06	3.19655e+06	168739	201282
	TRUE		C16 H37 F2 N5 O3	Invalid mass	No results	No results	Invalid mass	No results	3.01	385.28761	22.143	6418628.952	1	0	0				No matches found	No matches found	No matches found	No matches found	No MS2	[M+H]+1	184197	150864	137468	129074	201169	197944	149175	132318	280922	177839	154478	317738	235428	234819	147873	224211	381873	172948	175437	133193	242613	6.41863e+06	141389	152205	788945
	TRUE		C8 H15 F Si	Full match	No results	No results	Invalid mass	No results	-1.03	158.09254	23.047	1095302.283	12	0	0				No matches found	No matches found	No matches found	No matches found	No MS2	[M+H]+1	216450	235275	375430	283315	221744	216417	218111	211545	217313	150817	216981	230638	285865	189937	230588	220643	213036	229662	245296	73179	275142	224054	216855	235842	226366
	TRUE	N,N′,N″-Tris(2-aminoethyl)-1,3,5-triazine-2,4,6-triamine	C9 H21 N9	Full match	No results	No results	Full match	No results	-0.87	255.19177	22.644	892112.3855	1	0	0				No matches found	No matches found	No matches found	No matches found	No MS2	[M+H]+1	119859	120137	74189	134095	122579	128990	117177	121769	116360	123224	116158	115005	106980	129440	124427	104542	96112.2	129299	112031	117228	118347	129733	122340	120493	223153
	TRUE	11-Aminoundecanoic acid	C11 H23 N O2	Full match	No results	No results	Full match	No results	0.29	201.17294	23.004	930039.8766	121	0	0				No matches found	No matches found	No matches found	No matches found	No MS2	[M+H]+1	116763	145275	143183	158021	137107	132399	143872	136120	141407	145468	154232	139038	90606.6	930040	139694	99341.3	149288	146082	148566	139028	142590	105039	145330	154100	256156
	TRUE	Brassylic acid	C13 H24 O4	Full match	No results	No results	Full match	No results	0.02	244.16746	24.305	2538761.962	203	0	0				No matches found	No matches found	No matches found	No matches found	No MS2	[M+H]+1	203866	230352	239821	293099	218278	252690	232837	228358	2.53876e+06	234707	207535	141152	235877	235266	144099	242432	232890	219514	254309	242431	250353	228985	246849	231869	218066
	TRUE	Diethyl fumarate	C8 H12 O4	Full match	No results	No results	Full match	No results	-0.78	172.07343	2.707	433714.615	426	0	0				No matches found	No matches found	No matches found	No matches found	DDA for preferred ion	[M+H]+1	151556	70882.5	88188.3	176485	172797	70724.6	59855.3	74440.6	330749	139536	433715	57813.7	149426	90941.6	96921.9	114928	84218.2	124403	195655	103429	107549	50963.1	63670	106792	65038.1
	TRUE	3-Hydropyridazine	C4 H10 N2	Full match	No results	No results	Full match	No results	-0.9	86.08432	12.609	577030.7567	60	0	0				No matches found	No matches found	No matches found	No matches found	No MS2	[M+H]+1	57099.4	59788.4	58176.6	53466.7	53326.4	63458.3	56407.4	119904	55649.1	55032.1	47897.2	44031.2	114132	63328.1	56830.7	54481.4	57910.6	55731.3	60897.5	56467.6	100108	50643.3	55419.6	54014.4	55306.7
	TRUE		C5 H19 N4 P Si2	Full match	No results	No results	Invalid mass	Invalid mass	-1.18	222.08832	0.421	3444652.644	679	0	0				No matches found	No matches found	No matches found	Single match found	No MS2	[M+H]+1	64466	91472	86071.4	96560.3	49440.1	100039	3.44465e+06	53168	216764	61376.2	53236.8	83362	66687.9	81102.8	47900.2	76636.3	104993	115560	52316.5	93358.3	187602	72325.5	78457.6	58128.2	68881.9
	TRUE	Dicyclohexylamine	C12 H23 N	Full match	No results	No results	Full match	Full match	-0.01	181.18305	17.235	2414486.571	97	0	0				No matches found	No matches found	No matches found	Single match found	No MS2	[M+H]+1	78169.8	95081.6	144610	86888.1	119884	94660.1	53336.7	88145.7	728152	87104	91210.9	91422.3	357930	76897.5	92641.5	90871.1	489374	88236.5	91990	93461.8	93455	102776	86646.2	100593	87157.7
	TRUE	Tert-Butyl 4-(3-Amino-2-Hydroxypropyl)Piperazine-1-Carboxylate	C12 H25 N3 O3	Full match	No results	No results	Full match	No results	0.08	259.18961	25.223	967751.8355	13	0	0				No matches found	No matches found	No matches found	No matches found	No MS2	[M+H]+1	98613.3	273450	161746	106107	151053	179056	178299	173278	117681	142810	134890	112010	108965	967752	70290.2	120841	135995	165534	168799	174868	162561	68810.5	175328	119244	147437
	TRUE	Palmitoyl Serinol	C19 H39 N O3	Full match	No results	No results	Full match	No results	0.33	329.2931	21.166	2597223.642	17	0	0				No matches found	No matches found	No matches found	No matches found	No MS2	[M+H]+1	2.10664e+06	191397	162838	285281	160859	328710	78390.1	136616	154459	152605	155244	147233	245919	158378	223720	515678	141237	159820	146556	158370	161600	97649.6	98959.2	156205	167885
	TRUE	N-STEARYLTRIMETHYLENEDIAMINE	C21 H46 N2	Full match	No results	No results	Full match	No results	-0.11	326.36606	12.96	1747264.814	3	0	0				No matches found	No matches found	No matches found	No matches found	No MS2	[M+H]+1	73482.9	913277	99105.4	70471.5	224668	175224	798630	151608	182288	798697	1.46811e+06	620773	172029	830660	1.18703e+06	1.30509e+06	491089	126012	977950	1.32587e+06	785705	122669	116745	647021	184983
	TRUE	Civetone	C17 H30 O	Full match	No results	No results	Full match	No results	0.57	250.22981	21.718	3269703.8	86	0	0				No matches found	No matches found	No matches found	No matches found	No MS2	[M+H]+1	3.2697e+06	281643	215359	217990	192700	192970	202907	196592	2.3645e+06	150145	227327	218466	211386	184640	159650	186537	207133	1.23602e+06	93797.4	159106	209503	213570	213552	210350	210514
	TRUE		C4 H F I N O7 P2 S2	Full match	No results	No results	Invalid mass	No results	0.56	446.77009	2.01	1569784.536	1	0	0				No matches found	No matches found	No matches found	No matches found	No MS2	[M+H]+1	253733	675039	233021	244926	591402	203036	154087	246433	47789.9	934661	280938	584267	477039	364441	681580	210661	276087	510245	421577	220621	61747.6	472407	147454	84292.4	54141.3
	TRUE		C17 H40 F2 N6 O	Invalid mass	No results	No results	No match	No results	3.36	382.32445	21.945	1884358.533	23	0	0				No matches found	No matches found	No matches found	No matches found	No MS2	[M+H]+1	1.88436e+06	252848	326772	309408	266636	246023	303149	274135	294118	251791	266321	276874	240542	247931	300673	1.23459e+06	192966	260227	117782	254671	246331	271839	888527	282143	274808
	TRUE	N-Caprylyldiethanolamine	C12 H27 N O2	Full match	No results	No results	Full match	No results	-0.23	217.20413	23.721	930371.3744	21	0	0				No matches found	No matches found	No matches found	No matches found	No MS2	[M+H]+1	123516	121117	673918	97108.1	292468	121181	128512	121946	126308	128243	127119	212425	122028	125591	88344.5	117968	218474	139715	127509	124803	238010	930371	242137	337107	141481
	TRUE		C16 H39 F N6 O4	Full match	No results	No results	No match	No results	-1.18	398.30121	24.235	2461211.557	8	0	0				No matches found	No matches found	No matches found	No matches found	No MS2	[M+H]+1	244717	272075	248178	365631	475471	1.30265e+06	242659	249124	260908	314147	256382	252725	260490	267049	257441	282037	252359	248962	293756	270629	268334	254125	1.05451e+06	141622	236581
	TRUE	3-Hydropyridazine	C4 H10 N2	Full match	No results	No results	Full match	No results	-1.24	86.08429	7.568	975413.0404	60	0	0				No matches found	No matches found	No matches found	No matches found	No MS2	[M+H]+1	52836	173715	78640.8	20483.1	164857	41845.8	59299.8	256778	54849.2	390943	59501.6	61494.5	54629	56695.9	162899	184407	91665.4	63472.2	69480.2	143132	32972.3	121448	124372	55381.4	57321.9
	TRUE		C2 H10 F3 N9	Full match	No results	No results	Invalid mass	No results	-1.8	217.10074	24.235	2114241.018	20	0	0				No matches found	No matches found	No matches found	No matches found	No MS2	[M+H]+1	153941	171280	156237	218189	2.11424e+06	210654	152762	156112	155185	1.42482e+06	152876	125407	114196	168116	409362	169845	161855	156730	209339	170370	1.48068e+06	150603	159146	161615	148936
	TRUE	TRIS(HYDROXYETHYL)AMINOMETHANE	C7 H17 N O3	Full match	No results	No results	Full match	No results	-0.54	163.12076	23.715	1629506.81	12	0	0				No matches found	No matches found	No matches found	No matches found	No MS2	[M+H]+1	169995	136083	176221	140904	50427.4	147446	1.62951e+06	135128	148113	262624	142226	143122	136519	140517	144419	652247	153063	156319	138024	82665.2	144727	142155	140625	156325	170121
	TRUE		C17 H46 N8 O3 P2	Full match	No results	No results	No match	No results	2.1	472.3178	21.067	1781101.484	13	0	0				No matches found	No matches found	No matches found	No matches found	No MS2	[M+H]+1	158669	159380	195921	165113	157659	411511	154523	310819	156938	165322	159663	155438	233792	163451	174298	134331	155958	165479	155902	112368	164091	166820	177935	498474	159819
	TRUE	tert-butyl 4-(3-ethoxy-3-oxopropyl)piperidine-1-carboxylate	C15 H27 N O4	Full match	No results	No results	Full match	No results	-1.48	285.19358	20.876	1778902.202	61	0	0				No matches found	No matches found	No matches found	No matches found	No MS2	[M+H]+1	69869.2	172868	170840	196346	154669	157914	171942	161832	166463	173471	155519	154709	539076	164505	184323	149892	173586	141960	162250	441413	163133	160061	194201	220259	158837
	TRUE		C2 H10 F3 N9	Full match	No results	No results	No match	No results	-1.14	217.10088	21.553	1694812.398	20	0	0				No matches found	No matches found	No matches found	No matches found	No MS2	[M+H]+1	146030	149497	1.69481e+06	177305	153510	188001	140956	167297	146495	148487	194811	181078	156367	145571	156296	153979	149541	191457	147069	248709	202242	190092	144946	154951	99655.8
	TRUE	4-tert-Butylthiophenol	C6 H15 F O2 Si	Full match	No results	No results	Invalid mass	No results	-2.28	166.08215	20.995	1048126.111	71	0	0				No matches found	No matches found	No matches found	No matches found	DDA for preferred ion	[M+H]+1	336748	362121	401598	149250	146972	254304	155892	146926	95300.6	145547	146094	154671	121220	159336	158423	133554	174963	885416	145519	339371	165235	83375.9	160962	78349.7	233925
	TRUE	1,1,6-Trimethyl-1,2-dihydronaphthalene	C13 H16	Full match	No results	No results	Full match	No results	0.31	172.12525	19.956	1365701.079	135	0	0				No matches found	No matches found	No matches found	No matches found	No MS2	[M+H]+1	153508	147855	85258.5	368951	157329	156549	141456	538719	417595	140914	129726	146046	149292	131129	139711	157679	135936	155214	183981	142364	206537	85177.9	141442	356479	154380
	TRUE		C15 H37 F5 N10	Full match	No results	No results	Invalid mass	No results	-0.23	452.31218	23.152	1257648.064	9	0	0				No matches found	No matches found	No matches found	No matches found	No MS2	[M+H]+1	133342	138131	131388	119216	136093	124221	123127	1.25765e+06	129487	124634	180453	106524	145289	128388	130755	328266	134512	975410	139429	126578	138553	140394	134341	86515.3	137062
	TRUE	Triacetonamine	C9 H17 N O	Full match	No results	No results	Full match	No results	-0.83	155.13089	20.537	1062852.065	362	0	0				No matches found	No matches found	No matches found	No matches found	No MS2	[M+H]+1	104174	96587.3	99143.5	90233	126411	80942.5	111996	85711.7	84789.4	100952	85847.4	108229	93528.1	81754.1	85590.1	83525.7	87770.2	118114	83697.1	89120.4	87008.7	87654.7	86935.5	148123	84210
	TRUE	Isovalerylglycine	C7 H13 N O3	Full match	No results	No results	Full match	No results	-0.45	159.08947	21.356	1034235.646	361	0	0				No matches found	No matches found	No matches found	No matches found	No MS2	[M+H]+1	865286	166648	173450	912035	169551	171301	113987	165384	159286	157804	180408	173901	177818	242142	173459	158610	175632	237244	182342	170277	168651	169163	164543	158955	172499
	TRUE	Dicyclohexylamine	C12 H23 N	Full match	No results	No results	Full match	Full match	-0.42	181.18297	15.731	1257073.574	97	0	0				No matches found	No matches found	No matches found	Single match found	No MS2	[M+H]+1	118519	84048	161409	113923	108113	40391	1.25707e+06	120077	130733	118517	119415	105990	119228	118999	65377.3	115391	103766	115356	1.23845e+06	923469	120583	122419	117429	118914	230604
	TRUE	Boc-10-Adc-OH	C15 H29 N O4	Full match	No results	No results	Full match	No results	0.11	287.20969	23.89	879353.1515	89	0	0				No matches found	No matches found	No matches found	No matches found	No MS2	[M+H]+1	116531	126721	194302	123096	129380	130071	125640	879353	164049	124494	119447	121226	123552	125299	121520	109310	117015	152324	123690	120493	115416	128355	110250	129298	135430
	TRUE	Gly-Leu	C8 H16 N2 O3	Full match	No results	No results	Full match	No results	-1.26	188.11585	21.307	704592.9511	131	0	0				No matches found	No matches found	No matches found	No matches found	No MS2	[M+H]+1	97334.7	307395	466158	116670	126029	374613	704593	118345	124251	210371	124973	100684	181108	119980	131384	136528	133795	162081	118540	167015	136736	130106	150623	131228	131657
	TRUE	ethyl[(5-propyl-1,2,4-oxadiazol-3-yl)methyl]amine	C8 H15 N3 O	Full match	No results	No results	Full match	No results	1.22	169.12172	22.014	1218232.449	94	0	0				No matches found	No matches found	No matches found	No matches found	No MS2	[M+H]+1	155836	158502	171740	198377	149020	112535	180783	164484	122166	164455	161259	168032	172632	171784	155314	1.21823e+06	108465	160142	146441	78375.4	170806	172997	163816	227146	176590
	TRUE	Diethyl malonate	C7 H12 O4	Full match	No results	No results	Full match	Full match	-0.4	160.07349	20.951	2040649.425	321	0	0				No matches found	No matches found	No matches found	Single match found	No MS2	[M+H]+1	173354	168822	754615	169207	170999	165951	160359	157021	69766.5	502741	155618	87676.8	169407	175535	161962	152260	157063	164479	237400	245504	165698	2.04065e+06	167148	168913	155747
	TRUE		C17 H46 F N10 O4 P	Full match	No results	No results	Invalid mass	No results	0.74	504.34289	21.487	1436181.978	18	0	0				No matches found	No matches found	No matches found	No matches found	No MS2	[M+H]+1	179132	214440	163462	144536	185570	158278	249574	285787	103235	172093	1.43618e+06	164138	153537	159044	159866	178725	152878	135097	974654	164729	172882	157391	109388	175398	170178
	TRUE		C15 H37 F5 N10	Full match	No results	No results	Invalid mass	No results	1.05	452.31276	19.54	1330270.356	9	0	0				No matches found	No matches found	No matches found	No matches found	No MS2	[M+H]+1	388271	127294	72057.6	186834	125760	175151	150311	643079	290897	117230	173472	134476	133492	134805	115389	130849	142413	137098	119607	125660	119435	122510	129258	124880	117508
	TRUE	Cyclopentane	C5 H10	Full match	No results	No results	Full match	Full match	-0.39	70.07822	7.62	553068.9307	16	0	0				No matches found	No matches found	No matches found	Single match found	No MS2	[M+H]+1	36877.8	75573.8	86440.4	80461.3	31418.4	77337	69012	76052.7	73525.4	74853.9	70824.9	49964.5	65466.7	65047.9	36867.6	131117	68588.1	113163	146462	71252.6	62816.3	118183	56713.6	69528	127038
	TRUE	PYRIDOXAMINE	C8 H12 N2 O2	Full match	No results	No results	Full match	No results	-0.07	168.08987	7.17	1302401.29	417	0	0				No matches found	No matches found	No matches found	No matches found	No MS2	[M+H]+1	1.02629e+06	88748.2	88517.1	111454	176885	52554.6	78923.5	87082.7	430032	109108	99556.2	1.15966e+06	141912	148350	80629.9	90800.7	48373	81481	81567.9	81558.7	180762	79925	77265.2	64962.7	77134.8
	TRUE	2-(Methylthio)pyrimidine-4,5,6-triamine	C5 H9 N5 S	Full match	No results	No results	Full match	No results	1.16	171.05806	1.657	1013884.939	9	0	0				No matches found	No matches found	No matches found	No matches found	No MS2	[2M+NH4]+1	53293.4	266928	375310	103425	99992.4	92354.8	73924.3	55171.5	78426.9	80000.9	67679.8	100465	117751	83791.8	87255	92516.8	80406.1	79692.6	340865	360641	426002	96967	97852.1	93232.2	245093
	TRUE	valdipromide	C11 H23 N O	Full match	No results	No results	Full match	No results	-0.3	185.17791	12.77	565921.7021	122	0	0				No matches found	No matches found	No matches found	No matches found	No MS2	[M+H]+1	80779.4	60435.3	79324.1	71954.1	72598.7	78614	62400.9	80168.4	75393.5	74039.8	61896.7	59178.1	77374.3	79793.6	73555.4	71759.1	134635	96716.4	71456.6	157206	52223.2	69394.8	81938.2	72951.2	565922
	TRUE		C16 H37 F N6 O5	Full match	No results	No results	Invalid mass	No results	-2.08	412.28009	23.994	2388892.732	15	0	0				No matches found	No matches found	No matches found	No matches found	DDA for preferred ion	[M+H]+1	197246	194005	206981	207381	215113	163997	208868	192443	193426	151570	199422	221739	207106	300551	426944	207650	207815	215971	209461	211977	212290	202365	204093	2.38889e+06	203207
	TRUE	Acetophenone	C8 H8 O	Full match	No results	No results	Full match	Full match	-1.31	120.05736	22.008	2275715.58	58	0	0				No matches found	No matches found	No matches found	Single match found	No MS2	[M+H]+1	108238	158995	169998	196365	185618	179077	85182.2	121764	185761	162787	688838	232944	170882	2.27572e+06	153739	161236	133765	167588	145922	183909	181482	171243	162155	172328	174799
	TRUE	1,3,5-Norcaratriene	C7 H6	Full match	No results	No results	Full match	No results	-1.09	90.04685	20.879	2498042.705	17	0	0				No matches found	No matches found	No matches found	No matches found	No MS2	[M+H]+1	154918	165847	700923	157179	148388	1.17428e+06	158715	155259	159703	166426	149203	142681	157086	157824	160000	143805	157782	166928	155661	163069	2.49804e+06	153561	169264	165578	152386
	TRUE	TRIS(HYDROXYETHYL)AMINOMETHANE	C7 H17 N O3	Full match	No results	No results	Full match	No results	-0.36	163.12078	23.212	1269017.597	12	0	0				No matches found	No matches found	No matches found	No matches found	No MS2	[M+H]+1	1.25697e+06	153385	147298	138177	172704	140863	147535	138319	147765	87921.3	191861	148561	144650	1.26902e+06	155033	135741	126154	185385	110987	156232	828691	149642	119192	145627	228734
	TRUE	Benzylideneacetone	C10 H10 O	Full match	No results	No results	Full match	No results	-1.09	146.07301	23.264	1348691.166	205	0	0				No matches found	No matches found	No matches found	No matches found	No MS2	[M+H]+1	139538	145875	182923	131247	1.34869e+06	141138	70227.4	63162.5	141330	134731	593312	138022	73685.2	128355	122163	128873	429166	138012	174188	137095	137728	336640	135813	112550	134428
	TRUE	ethyl[(5-propyl-1,2,4-oxadiazol-3-yl)methyl]amine	C8 H15 N3 O	Full match	No results	No results	Full match	No results	0.36	169.12157	22.51	1214315.752	94	0	0				No matches found	No matches found	No matches found	No matches found	No MS2	[M+H]+1	154902	284163	156729	157537	155321	159216	152450	159077	153160	147833	161078	113366	167897	154583	156130	205866	153292	126430	144336	150862	153614	154077	166851	150820	673043
	TRUE	1-nonanoic acid	C9 H18 O2	Full match	No results	No results	Full match	No results	-0.39	158.13062	22.805	1288157.907	426	0	0				No matches found	No matches found	No matches found	No matches found	No MS2	[M+H]+1	162918	164259	161738	160609	209661	158217	155985	162387	487221	806156	165941	152486	88514.7	1.28816e+06	159013	147998	161340	173889	168791	156963	156296	163640	158493	244167	159986
	TRUE	Stearoylethanolamide	C20 H41 N O2	Full match	No results	No results	Full match	No results	-0.14	327.31368	20.772	1853303.427	37	0	0				No matches found	No matches found	No matches found	No matches found	No MS2	[M+H]+1	257070	168392	194917	90394.4	252218	194616	1.07394e+06	217466	127816	284367	184640	177868	185598	182276	187484	182442	156672	176528	174385	160123	182058	182353	180087	123448	171561
	TRUE		C2 H8 P2 S2	Full match	No results	No results	Unused	No results	0.91	157.95441	16.954	1140965.986	3	0	0				No matches found	No matches found	No matches found	No matches found	No MS2	[M+H]+1	88024.9	83901.2	846443	82387	76583.1	78477.6	65608.4	90790.7	65568.6	136234	352809	110443	81236.5	61160.7	82706.4	1.14097e+06	260149	98142.2	156271	77783.7	74817.4	80771.8	133239	401743	58972.4
	TRUE		C H5 O2 P3 S2	Full match	No results	No results	Invalid mass	No results	1.7	205.89473	2.247	1532531.465	1	0	0				No matches found	No matches found	No matches found	No matches found	No MS2	[M+H]+1	63012.1	71660.3	51391.8	83821.8	49303.9	459440	69517.9	141438	65116	55566.8	54156.6	46923.9	171502	178538	65503.8	60511	57898.8	54468.7	52116.7	70868.8	49593.3	66678.7	63334.2	55889.4	1.53253e+06
	TRUE		C18 H43 F N6 O4	Full match	No results	No results	No match	No results	0.8	426.33332	19.843	2021855.661	11	0	0				No matches found	No matches found	No matches found	No matches found	No MS2	[M+H]+1	143634	157933	130916	148072	150267	145264	155882	149604	139240	156420	138401	142554	154860	139094	136624	128825	2.02186e+06	137446	139702	143465	156973	198501	222059	141044	152368
	TRUE		C16 H39 F5 N10	Full match	No results	No results	No match	No results	1.08	466.32844	20.061	1384476.42	11	0	0				No matches found	No matches found	No matches found	No matches found	No MS2	[M+H]+1	126838	122438	133367	127230	131167	114801	136273	174842	234105	155423	128471	515944	124239	139526	116493	119711	133747	140278	121969	122843	297466	126814	200774	128997	131672
	TRUE	aminoazobenzene	C6 H7 N3	Full match	No results	No results	Full match	No results	-0.75	121.06391	23.872	1897825.502	69	0	0				No matches found	No matches found	No matches found	No matches found	No MS2	[M+H]+1	148481	208235	151997	92952.3	62760.7	163091	152684	157348	726148	142628	156317	504443	97787.1	160407	165456	215242	148319	80850.7	157603	92639.4	153839	160641	156196	163837	159236
	TRUE	TRIETHYLENE GLYCOL MONOTRIDECYL ETHER	C19 H40 O4	Full match	No results	No results	Full match	No results	0.36	332.29278	21.137	1875129.304	2	0	0				No matches found	No matches found	No matches found	No matches found	No MS2	[M+H]+1	160477	255982	698105	161886	172908	169919	165650	368864	158159	164189	160616	173318	185548	281427	187666	150123	168348	161747	144177	74603.9	168443	169592	172919	164982	174062
	TRUE	1,1′-(Octylimino)dipropan-2-ol	C14 H31 N O2	Full match	No results	No results	Full match	No results	-0.15	245.23544	22.696	1358996.937	9	0	0				No matches found	No matches found	No matches found	No matches found	No MS2	[M+H]+1	138344	125060	134030	140201	146697	154299	133295	126415	131805	137775	137395	132186	135772	129897	519293	298173	762645	251704	1.359e+06	88043	130647	91748	128448	130786	92544.2
	TRUE		C2 H5 P Si2	Invalid mass	No results	No results	Invalid mass	No results	3.25	115.96712	1.709	713048.8692	1	0	0				No matches found	No matches found	No matches found	No matches found	DDA for preferred ion	[M+H]+1	97569.3	138174	53344.5	74500.8	346215	77495.2	101013	131921	97680	57523.8	78925.3	713049	636783	114680	563534	100426	118446	173847	117146	536428	151528	96828.6	87694.3	84219.4	89685.9
	TRUE	N-Heptadecyl-1,3-propanediamine	C20 H44 N2	Full match	No results	No results	Full match	No results	-0.68	312.35024	22.105	1009485.708	4	0	0				No matches found	No matches found	No matches found	No matches found	No MS2	[M+H]+1	89981.2	1.00949e+06	138777	142015	448962	275423	88482	207077	133690	132616	130994	134026	238043	148514	279187	138844	88909.9	131392	427565	148038	135874	143421	134077	210354	138380
	TRUE		C16 H44 N9 O P	Full match	No results	No results	Invalid mass	No results	-0.81	409.34031	20.758	3274272.824	1	0	0				No matches found	No matches found	No matches found	No matches found	No MS2	[M+H]+1	214899	201911	232606	294670	221597	275519	205496	243186	217779	473563	239654	211677	228377	221231	3.27427e+06	198941	213980	210082	203347	398978	184394	217015	214318	214636	288458
	TRUE	tranexamic acid	C8 H15 N O2	Full match	No results	No results	Full match	No results	-0.73	157.11016	22.3	1358719.545	734	0	0				No matches found	No matches found	No matches found	No matches found	DDA for preferred ion	[M+H]+1	1.35872e+06	303257	66130.9	265587	173473	158018	151258	47660.8	172146	166924	119676	95042.9	171549	171262	60447.1	167547	178224	158302	158024	181780	156518	163175	158681	156782	172678
	TRUE		C16 H43 F N9 O P	Full match	No results	No results	No match	No results	-2.93	427.32997	18.987	1961099.213	10	0	0				No matches found	No matches found	No matches found	No matches found	No MS2	[M+H]+1	74942	129859	194752	273409	132773	153301	147962	209633	139797	145754	144112	113301	189130	535002	137297	226560	534738	145876	143023	562036	996167	152528	136964	141612	856601
	TRUE	Dmapn	C5 H10 N2	Full match	No results	No results	Full match	No results	-1.17	98.08428	19.603	2041533.095	78	0	0				No matches found	No matches found	No matches found	No matches found	No MS2	[M+H]+1	149334	144435	1.07108e+06	142953	164614	69677.6	144591	130102	141261	144425	144428	130903	1.32017e+06	259443	152414	147971	128981	87163.1	146380	125846	151184	85107.3	142171	111308	140531
	TRUE	N-lauroylglycine	C14 H27 N O3	Full match	No results	No results	Full match	No results	0.1	257.19912	24.127	1840703.621	92	0	0				No matches found	No matches found	No matches found	No matches found	No MS2	[M+H]+1	158122	154506	104111	154742	156102	147451	142942	137293	144624	644112	1.8407e+06	142375	152394	143002	144731	460655	139073	101792	152185	151570	153489	145114	140257	143370	143505
	TRUE	L-(−)-Threonine	C4 H9 N O3	Full match	No results	No results	Full match	No results	-1.09	119.05811	17.054	2138100.636	101	0	0				No matches found	No matches found	No matches found	No matches found	No MS2	[M+H]+1	136092	132857	143883	111534	112588	118822	126790	121493	98849.9	183116	272748	141583	133737	103188	168974	134154	139929	140114	143769	123763	124370	146104	139821	2.1381e+06	113910
	TRUE	1,2-Dioxin	C4 H4 O2	Full match	No results	No results	Full match	No results	-0.26	84.02111	24.086	1409964.725	29	0	0				No matches found	No matches found	No matches found	No matches found	No MS2	[M+H]+1	157582	168193	170473	293177	177085	173924	164930	164737	160260	161308	172908	123941	175054	159614	172650	168567	848567	113110	176966	172543	182974	159209	171735	182117	167692
	TRUE		C19 H41 F N6 O	Full match	No results	No results	Invalid mass	No results	0.45	388.33276	21.21	13979657.17	37	0	0				No matches found	No matches found	No matches found	No matches found	No MS2	[M+H]+1	188418	160680	149125	158047	176995	138660	156761	1.32261e+06	157321	158023	169310	147999	174792	165048	284634	651348	246068	138528	264370	160815	156297	112142	170898	152964	152051
	TRUE		C17 H41 F5 N10	Full match	No results	No results	No match	No results	0.5	480.34382	19.89	2234371.841	12	0	0				No matches found	No matches found	No matches found	No matches found	No MS2	[M+H]+1	155926	145987	158281	417112	174649	162396	623564	171600	140578	207671	166628	167219	182688	144436	182314	131308	2.23437e+06	152485	155668	186273	164145	162911	241832	155109	159866
	TRUE		C17 H39 N5 O5	Full match	No results	No results	Invalid mass	No results	-2.68	393.29407	20.285	2673679.624	3	0	0				No matches found	No matches found	No matches found	No matches found	No MS2	[M+H]+1	97796.1	114078	110246	136350	115443	142274	167081	2.67368e+06	115386	76705.7	118951	121083	111223	256267	173470	193169	100993	104987	114807	1.1921e+06	137750	119589	104715	190623	106091
	TRUE	.alpha.-Aminoadipic acid	C6 H11 N O4	Full match	No results	No results	Full match	No results	-0.79	161.06868	23.408	2535636.606	201	0	0				No matches found	No matches found	No matches found	No matches found	No MS2	[M+H]+1	83207.6	141631	136266	127397	243805	137577	137107	141709	133287	139293	84035.7	2.53564e+06	147868	157025	145170	141956	138834	140065	138078	137444	140730	155870	123739	148834	152361
	TRUE	tert-butyl 4-(3-ethoxy-3-oxopropyl)piperidine-1-carboxylate	C15 H27 N O4	Full match	No results	No results	Full match	No results	-0.96	285.19374	20.59	1439816.164	61	0	0				No matches found	No matches found	No matches found	No matches found	No MS2	[M+H]+1	181893	115284	144817	63302.8	79999.8	101497	181755	109517	98590.2	1.43982e+06	199792	138428	107471	240934	121828	236897	100770	149581	180553	67016.6	437484	110827	116460	467561	109753
	TRUE	Triacetonamine	C9 H17 N O	Full match	No results	No results	Full match	No results	-0.26	155.13097	19.903	1458618.11	362	0	0				No matches found	No matches found	No matches found	No matches found	No MS2	[M+H]+1	108903	103997	113668	104526	127110	117459	115839	109410	153500	85393.1	109050	108336	108133	106414	111417	104284	121917	99898.1	112593	107091	118724	110525	112482	112189	190391
	TRUE	1,1′-(Octylimino)dipropan-2-ol	C14 H31 N O2	Full match	No results	No results	Full match	No results	-0.52	245.23535	22.198	1169866.741	9	0	0				No matches found	No matches found	No matches found	No matches found	No MS2	[M+H]+1	104133	98153	101214	111700	109334	154924	1.16987e+06	110809	103831	183761	103868	166486	111917	185407	113212	174496	103674	105241	102530	105507	102471	87401.2	125743	433586	109287
	TRUE	Pentadecanedioic acid	C15 H28 O4	Full match	No results	No results	Full match	No results	-0.08	272.19874	22.69	1715320.497	173	0	0				No matches found	No matches found	No matches found	No matches found	No MS2	[M+H]+1	228522	102400	110259	118004	120680	126933	109654	1.71532e+06	108909	87604.3	118931	72151.2	191959	106859	109852	535750	111827	165172	130303	110380	108497	116889	106749	107591	109141
	TRUE		C17 H41 F5 N10	Full match	No results	No results	Invalid mass	No results	-0.36	480.34341	19.804	3096559.582	12	0	0				No matches found	No matches found	No matches found	No matches found	No MS2	[M+H]+1	167928	154654	190604	142255	1.22888e+06	193413	623564	146328	162950	135629	166608	168211	164254	3.09656e+06	162484	156213	2.23437e+06	513774	151108	149279	91886.5	174320	174568	157669	171559
	TRUE	N-lauroylglycine	C14 H27 N O3	Full match	No results	No results	Full match	No results	0.6	257.19925	24.084	1840703.621	92	0	0				No matches found	No matches found	No matches found	No matches found	No MS2	[M+H]+1	150820	160976	77312.5	158728	782719	166461	152046	157668	153383	168814	1.8407e+06	166605	163161	152764	114576	380261	172910	163536	169372	165140	156843	192682	164366	174303	160496
	TRUE	4,4′-Trimethylenebis-(N-piperidineethanol)	C17 H34 N2 O2	Full match	No results	No results	Full match	No results	-1.21	298.26167	16.087	1679767.262	22	0	0				No matches found	No matches found	No matches found	No matches found	No MS2	[M+H]+1	154201	99139.3	144513	152244	151425	156591	147750	149763	116091	150865	148099	126807	147634	118216	146019	148559	126380	147217	127601	125237	145360	148792	147919	149233	126849
	TRUE	Gly-Leu	C8 H16 N2 O3	Full match	No results	No results	Full match	No results	-0.93	188.11592	22.975	2123319.779	131	0	0				No matches found	No matches found	No matches found	No matches found	DDA for other ion	[M+H]+1	173642	169334	178418	160934	161376	157267	156608	165627	162419	826192	175396	161370	215715	165616	160919	157988	177394	624160	2.12332e+06	148360	180259	283489	170131	177704	180686
	TRUE		C4 H5 F S2	Invalid mass	No results	No results	No match	No results	3.21	135.98211	20.05	2208238.826	1	0	0				No matches found	No matches found	No matches found	No matches found	No MS2	[M+H]+1	156891	148558	164967	166887	88960.7	348726	168562	86487.4	140950	159744	161063	162632	153676	172585	449069	148076	2.20824e+06	170080	152723	157508	149204	75593	108455	159561	162870
	TRUE		C2 H10 F3 N9	Full match	No results	No results	No match	No results	-1.13	217.10088	22.626	2644628.435	20	0	0				No matches found	No matches found	No matches found	No matches found	No MS2	[M+H]+1	1.20344e+06	167436	166733	196767	164655	199452	165530	167311	171420	162617	1.96386e+06	156107	165341	176253	941340	158173	154055	177850	2.64463e+06	154854	164334	176229	170052	378216	221369
	TRUE	2-Carbethoxycyclopentanone	C8 H12 O3	Full match	No results	No results	Full match	No results	2.6	156.07905	2.06	359980.622	601	0	0				No matches found	No matches found	No matches found	No matches found	DDA for preferred ion	[M+H]+1	55583.1	53129.6	58661.8	71735.6	213424	75370.1	38521	97030.8	24555.1	45585.9	62565.4	40951.9	67351.4	359981	54046.9	355980	60602	52481.6	88861.7	62093	101783	277350	126620	33352.4	69797.6
	TRUE	1-Ethyl-4-(4-propylcyclohexyl)benzene	C17 H26	Full match	No results	No results	Full match	No results	-0.15	230.20342	18.636	2609859.674	35	0	0				No matches found	No matches found	No matches found	No matches found	No MS2	[M+H]+1	205757	734991	580060	110720	556225	150225	141707	62749	134914	391187	335877	856497	461406	967845	1.85413e+06	727222	963101	217450	170183	195933	155325	154675	143581	149199	641643
	TRUE		C17 H46 F N10 O4 P	Full match	No results	No results	Invalid mass	No results	0.98	504.34301	22.985	1714813.702	18	0	0				No matches found	No matches found	No matches found	No matches found	No MS2	[M+H]+1	168440	1.71481e+06	155141	673072	156541	120721	154500	158105	767283	778363	175166	169865	164180	215280	129220	153255	161834	159696	861975	87276.8	174859	137788	156199	172380	153778
	TRUE	Lauric acid	C12 H24 O2	Full match	No results	No results	Full match	Full match	-0.31	200.17757	24.252	2343238.923	362	0	0				No matches found	No matches found	No matches found	Single match found	No MS2	[M+H]+1	352248	186834	178038	253310	192410	329053	145978	224641	180757	176843	177622	175088	183798	471804	180030	195395	173997	175848	2.34324e+06	187493	225046	177535	189686	185912	163904
	TRUE	1,1,6-Trimethyl-1,2-dihydronaphthalene	C13 H16	Full match	No results	No results	Full match	No results	-0.14	172.12518	20.294	1391310.735	135	0	0				No matches found	No matches found	No matches found	No matches found	No MS2	[M+H]+1	137594	257623	142486	158276	79886.7	175390	148668	151661	148118	883593	153735	156492	152379	113823	86323.9	217393	274495	147811	148380	149265	148222	144407	142493	160226	175591
	TRUE	tert-butyl 4-(3-ethoxy-3-oxopropyl)piperidine-1-carboxylate	C15 H27 N O4	Full match	No results	No results	Full match	No results	0.03	285.19402	20.803	1778422.186	61	0	0				No matches found	No matches found	No matches found	No matches found	No MS2	[M+H]+1	69869.2	167365	160997	167200	171799	756570	204959	178203	197412	185025	168328	400497	182997	173656	166261	167884	176607	171284	168737	94026.1	176379	228601	96517.6	215610	175434
	TRUE	1,2-Dioxin	C4 H4 O2	Full match	No results	No results	Full match	No results	-0.93	84.02105	20.043	2537961.135	29	0	0				No matches found	No matches found	No matches found	No matches found	No MS2	[M+H]+1	146285	147601	137747	155604	104953	85426.7	157167	144071	131421	148945	858367	150757	1.79481e+06	156749	90524.7	454551	133466	145378	142398	190487	131519	1.04413e+06	145540	383052	143999
	TRUE	octapinol	C15 H31 N O	Full match	No results	No results	Full match	No results	0.44	241.24067	19.939	1292071.925	47	0	0				No matches found	No matches found	No matches found	No matches found	No MS2	[M+H]+1	113793	113443	117028	1.29207e+06	128695	133250	123266	126944	125864	119003	117348	133480	114499	1.15582e+06	120622	119414	123342	119705	341677	124214	261880	68914.6	118184	123566	134107
	TRUE	(Dioxido-λ~6~-sulfanylidene)methanethiol	C H2 O2 S2	Full match	No results	No results	Full match	No results	-2.23	109.94938	20.913	3792375.181	1	0	0				No matches found	No matches found	No matches found	No matches found	No MS2	[M+H]+1	151526	150361	148118	147037	146715	155265	113015	158206	153104	154287	139737	159193	3.79238e+06	148860	161029	147647	176384	183892	159297	158108	154141	153912	409928	160816	138469
	TRUE	1-cyclohexylpiperidin-4-one	C11 H19 N O	Full match	No results	No results	Full match	No results	-0.39	181.14659	7.562	873899.619	208	0	0				No matches found	No matches found	No matches found	No matches found	No MS2	[M+H]+1	45044.9	301320	66000.4	567654	113450	133099	51404	159435	77629.6	67486.3	42426.6	53306.5	47355.1	49146.8	48021.7	45738.6	47908.7	55020.8	204181	124074	45580.1	23509.3	191333	48007.3	46925.3
	TRUE	3-Ethyl-1-heptyne	C9 H16	Full match	No results	No results	Full match	No results	-0.93	124.12508	19.96	1743374.071	202	0	0				No matches found	No matches found	No matches found	No matches found	No MS2	[M+H]+1	148792	177693	154274	1.74337e+06	96409.4	162877	136863	134600	147275	194793	124159	139779	142887	129681	143244	150913	130104	148554	127530	136255	178536	187039	186359	145519	173737
	TRUE	N-Boc-piperidine-3-methanol	C11 H21 N O3	Full match	No results	No results	Full match	No results	-0.08	215.15213	19.852	1432177.459	194	0	0				No matches found	No matches found	No matches found	No matches found	No MS2	[M+H]+1	126111	138665	140372	59147.5	66177	121175	149616	131078	122253	131977	108552	90516.9	121384	122124	119108	139795	1.43218e+06	120677	114226	133794	123970	137003	149377	131977	133779
	TRUE	Paraldehyde	C6 H12 O3	Full match	No results	No results	Full match	No results	-1.07	132.0785	17.069	1070508.361	316	0	0				No matches found	No matches found	No matches found	No matches found	No MS2	[M+H]+1	107582	109374	600254	84693.1	1.07051e+06	280373	98293.1	952544	79053.3	107848	114823	115457	106171	85459.2	111713	115445	87730.8	62771.1	113653	110372	116466	110885	109216	94984.4	109399
	TRUE	Octanoic anhydride	C16 H30 O3	Full match	No results	No results	Full match	No results	-0.68	270.21931	18.131	1382243.095	112	0	0				No matches found	No matches found	No matches found	No matches found	No MS2	[M+NH4]+1	93055.4	64430.4	161004	76355.5	818070	74969.8	162332	85166.3	85574.3	269334	79108.6	145336	92904.8	83921.8	90191	69715	91467.9	413210	69208.4	90850.1	77572.5	82748.9	69939.9	65894.7	71662.3
	TRUE		C16 H45 N9 O2 P2	Full match	No results	No results	Invalid mass	No results	0.36	457.31731	17.311	883920.877	9	0	0				No matches found	No matches found	No matches found	No matches found	No MS2	[M+H]+1	113515	883921	69718.4	122957	89009	129343	120372	242515	50315.3	108512	111135	131692	113906	91781.3	115048	118714	110451	229592	112753	78946.6	110411	114383	641279	182068	110081
	TRUE	Diethyl malonate	C7 H12 O4	Full match	No results	No results	Full match	Full match	-0.33	160.07351	20.661	3027418.941	321	0	0				No matches found	No matches found	No matches found	Single match found	No MS2	[M+H]+1	153641	3.02742e+06	124878	205327	140493	119801	247478	183615	54960.2	130100	134570	133936	145443	140466	138530	121656	294209	131766	120102	98842.8	186001	135978	1.53439e+06	144533	121480
	TRUE	Lauric acid	C12 H24 O2	Full match	No results	No results	Full match	Full match	0.06	200.17764	19.782	1164747.811	362	0	0				No matches found	No matches found	No matches found	Single match found	No MS2	[M+H]+1	138644	126420	135823	75054.1	152248	133750	289393	125038	136072	67691.8	88630.1	126560	144227	133369	980479	125015	137070	207086	125968	130456	133486	123152	221898	1.04766e+06	83056.3
	TRUE	Tetramethylurea	C5 H12 N2 O	Full match	No results	No results	Full match	No results	-1.64	116.09477	22.913	1607800.741	116	0	0				No matches found	No matches found	No matches found	No matches found	DDA for preferred ion	[M+H]+1	1.08491e+06	237665	247066	220689	238794	222043	229721	225661	560733	234480	241130	229485	242145	297707	248620	701315	231596	249295	258545	136661	141426	241523	248889	252025	153294
	TRUE	L6TJ AVMZ DVMZ	C8 H16 N4 O2	Full match	No results	No results	Full match	No results	1.18	200.12756	10.476	982218.3062	32	0	0				No matches found	No matches found	No matches found	No matches found	DDA for preferred ion	[M+H]+1	141831	81743.3	81622.7	168316	722690	109231	112777	116731	158151	982218	75631.2	116176	98579	116740	236825	694430	181503	776812	393742	103204	667567	199539	47873.6	462311	91223.9
	TRUE		C19 H44 N3 O P	Full match	No results	No results	No match	No results	2.91	361.32325	21.841	4428379.007	2	0	0				No matches found	No matches found	No matches found	No matches found	No MS2	[M+H]+1	134590	130199	118943	123535	132352	120844	1.52667e+06	128001	134096	131399	126073	174701	127484	2.37439e+06	124991	113131	2.64014e+06	123702	2.36707e+06	4.42838e+06	129472	139103	140113	124509	130786
	TRUE	N-Heptadecyl-1,3-propanediamine	C20 H44 N2	Full match	No results	No results	Full match	No results	-0.07	312.35043	21.216	2933841.548	4	0	0				No matches found	No matches found	No matches found	No matches found	No MS2	[M+H]+1	242571	2.32722e+06	227831	246122	296583	239847	271812	235969	250830	241425	258668	227134	282742	1.14906e+06	248192	231044	237588	245343	255749	245689	240137	204637	139868	672231	240159
	TRUE	ethyl[(5-propyl-1,2,4-oxadiazol-3-yl)methyl]amine	C8 H15 N3 O	Full match	No results	No results	Full match	No results	0.51	169.1216	23.277	2402175.196	94	0	0				No matches found	No matches found	No matches found	No matches found	No MS2	[M+H]+1	171725	176633	133733	254476	919977	170897	164255	168159	164630	160365	168604	164176	581527	1.62447e+06	163295	162882	196858	548065	160860	169449	174650	374743	170244	175621	155118
	TRUE	5-methylisoxazol	C4 H5 N O	Full match	No results	No results	Full match	No results	-0.98	83.03703	23.722	1131171.297	37	0	0				No matches found	No matches found	No matches found	No matches found	No MS2	[M+H]+1	131985	138687	145527	144207	307766	138761	227436	139637	151585	146847	145560	146690	171322	143810	394473	126940	156651	289939	142775	87023.5	144893	143654	143921	108358	217585
	TRUE	C6E2	C10 H22 O3	Full match	No results	No results	Full match	No results	-0.94	190.15672	24.032	691660.8183	63	0	0				No matches found	No matches found	No matches found	No matches found	No MS2	[M+H]+1	112273	117224	303195	115207	125162	119846	116382	112088	109913	113202	691661	120139	115860	123533	113284	424674	117046	116179	172519	118921	122942	215144	120111	321946	107013
	TRUE		C18 H41 F N5 O5 P	Full match	No results	No results	No match	No results	1.68	457.2837	23.149	1744419.087	8	0	0				No matches found	No matches found	No matches found	No matches found	No MS2	[M+H]+1	206482	258796	259793	237790	259274	248091	244527	253987	243995	243793	264476	250122	286364	243562	283779	262635	252015	250157	270945	239351	259586	268708	1.74442e+06	1.42137e+06	256793
	TRUE		C17 H47 N10 O4 P	Full match	No results	No results	No match	No results	1.07	486.35246	23.546	972330.8685	3	0	0				No matches found	No matches found	No matches found	No matches found	No MS2	[M+H]+1	318898	138828	135420	310152	138158	133972	416594	127256	134554	354558	137832	436812	135224	133541	137861	266480	131342	116678	148553	130029	136163	129913	162130	136437	126989
	TRUE	1-Hexadecanoylpyrrolidine	C20 H39 N O	Full match	No results	No results	Full match	No results	-0.32	309.30307	19.2	1396296.224	46	0	0				No matches found	No matches found	No matches found	No matches found	No MS2	[M+H]+1	118726	134228	125056	318846	109781	125963	123695	155552	111721	126811	124023	154956	122160	122577	86301.4	120167	112482	122432	120649	82537.2	118870	311367	118557	126279	118729
	TRUE	Boc-10-Adc-OH	C15 H29 N O4	Full match	No results	No results	Full match	No results	0.52	287.20981	21.126	1730981.611	89	0	0				No matches found	No matches found	No matches found	No matches found	No MS2	[M+H]+1	171102	185285	171942	164283	184355	1.73098e+06	124277	163100	158839	179767	1.091e+06	184793	214501	185028	183120	162078	781432	172770	153723	169476	179595	176365	184367	669740	103171
	TRUE	Diamantane	C14 H20	Full match	No results	No results	Full match	No results	-0.22	188.15646	21.773	2383476.785	145	0	0				No matches found	No matches found	No matches found	No matches found	No MS2	[M+H]+1	143709	143940	146365	131158	145240	139641	148168	152336	142541	151458	136249	129211	173305	144497	144531	133252	148792	156345	217050	149693	139378	2.38348e+06	149177	141198	148250
	TRUE		C17 H44 F N9 O2	Full match	No results	No results	Invalid mass	No results	-0.22	425.36011	20.472	2362004.182	1	0	0				No matches found	No matches found	No matches found	No matches found	No MS2	[M+H]+1	172107	180093	170193	148595	1.98342e+06	145977	154604	157788	155880	167013	148481	117028	2.362e+06	151938	163420	144127	169236	182955	149437	147872	145746	154972	168412	284130	165703
	TRUE		C15 H39 N9 O2	Full match	No results	No results	Invalid mass	No results	0.89	377.32301	20.004	1429236.04	1	0	0				No matches found	No matches found	No matches found	No matches found	No MS2	[M+H]+1	186180	729878	190488	180045	201299	186817	181890	181502	173956	179391	177882	186959	182451	180971	187070	167045	273807	180206	720413	191296	186122	181401	483242	1.42924e+06	184660
	TRUE	tridec-2-enal	C13 H24 O	Full match	No results	No results	Full match	No results	0.21	196.18276	21.166	4381468.957	309	0	0				No matches found	No matches found	No matches found	No matches found	No MS2	[M+H]+1	332921	219238	213132	219052	210541	196483	211105	479536	225831	199738	203192	101224	199715	207294	210746	246805	184859	151124	191821	87015.1	211511	64270.1	205470	204450	219738
	TRUE	N-Carbethoxypiperazine	C7 H14 N2 O2	Full match	No results	No results	Full match	No results	-0.2	158.1055	24.041	1774018.153	274	0	0				No matches found	No matches found	No matches found	No matches found	No MS2	[M+H]+1	164810	179027	234473	166482	184657	173184	168178	163990	177701	163983	181756	179642	167424	178512	168967	167589	169139	167886	190401	171848	142737	173245	169181	281034	1.77402e+06
	TRUE		C11 H7 F2 I N10 O7 P2	Full match	No results	No results	No match	No results	-1.08	617.89805	17.363	2533685.826	3	0	0				No matches found	No matches found	No matches found	No matches found	No MS2	[M+H]+1	103635	101298	274054	122420	106010	121021	103312	98416.7	90239.5	93872.4	101437	127241	113924	77467.4	119713	105797	101703	101018	103685	104592	94766.7	97460.4	100784	104857	99006.4
	TRUE	4-(1-Pyrrolidinyl)piperidine	C9 H18 N2	Full match	No results	No results	Full match	No results	0.88	154.14713	20.008	4323965.737	152	0	0				No matches found	No matches found	No matches found	No matches found	No MS2	[M+H]+1	349850	120278	128936	77610.4	273511	87467.2	123116	117618	117746	121425	116034	126547	123496	313596	126623	151670	124330	121976	123245	129483	136255	232100	119150	81085.9	3.84059e+06
	TRUE	Ethyl levulinate	C7 H12 O3	Full match	No results	No results	Full match	No results	-0.69	144.07854	19.524	2093831.791	517	0	0				No matches found	No matches found	No matches found	No matches found	No MS2	[M+H]+1	158032	173351	154693	182616	146176	204842	163419	643594	1.08171e+06	105797	161575	137139	160074	164307	140382	167792	251005	163401	149724	159261	164780	927098	922015	147477	165703
[truncated: 2,596 more rows]
[truncated: 73 more columns]
